# Supplementary material for: Noncoding origins of anthropoid traits and a new null model of transposon functionalization
Source: HighWire-hosted journal article supplement (doi:10.1101/gr.168963.113), 2014-07-20
Supplement: Supplemental_Table_S3.xlsx [file Supplemental_Table_S3.xlsx]

## Sheet: Sheet1
Ontology	Term Name	P-value	FDR Q-value	Fold Enrichment	Expected	Foreground Region Hits (ASCs)	Background Region Hits (ACs)	Foreground Gene Hits	Background Gene Hits	Total Genes Annotated	Foreground Genes	Background Genes
MSigDB Perturbation	The 'group 2 set' of genes associated with acquired endocrine therapy resistance in breast tumors expressing ESR1 and ERBB2 [Gene ID=2099, 2064].	1.27237e-18	8.75438e-15	1.45388	356.289	518	2799	162	256	355	ABLIM2,AGBL2,AIFM2,AIG1,ANKS1A,ANUBL1,API5,ARL4C,ARL6,ARMC2,ARMC4,ATP9B,BBS12,C10orf46,C14orf129,C16orf80,C17orf79,C21orf59,C3orf15,C5orf53,C6orf103,C8orf48,C9orf24,CAMSAP1,CAPS2,CC2D2A,CCDC113,CCDC19,CCDC89,CCT6B,CDK5R1,CDKL3,CEP120,CEP70,CMPK2,COCH,CRY1,CYP2U1,CYTH3,DHFR,DNAH11,DNAH5,DNAH6,DNAI1,DNAJC27,DNAL4,DPY19L1,DPY19L2P2,DYNLRB2,DZIP1,E2F7,EFCAB6,EFHC1,EFHC2,EIF2C2,EML1,EML6,ENKUR,ERCC4,F…	ABHD6,ABLIM2,AGBL2,AIFM2,AIG1,AK7,AKNA,ANKS1A,ANUBL1,API5,APOLD1,ARL4C,ARL6,ARMC2,ARMC3,ARMC4,ATP9B,BBS12,C10orf46,C14orf129,C16orf80,C17orf79,C1orf151,C21orf59,C3orf15,C5orf42,C5orf53,C6orf103,C6orf165,C6orf64,C8orf48,C9orf135,C9orf24,C9orf6,C9orf98,CAMSAP1,CAPS2,CC2D2A,CCDC113,CCDC19,CCDC89,CCNO,CCPG1,CCT6B,CDK5R1,CDKL3,CDKN2D,CEP120,CEP350,CEP70,CMPK2,COCH,COG7,CRY1,CYP2U1,CYTH3,DCTN2,DDX25,DH…
MSigDB Perturbation	Genes down-regulated in nsopharyngeal carcinoma relative to the normal tissue.	1.40558e-10	9.55149e-08	1.37379	271.512	373	2133	110	171	278	ABCA13,ABLIM1,AGBL2,AGR2,ALDH1L1,ARMC2,ARMC4,ATP10B,BACE2,BANK1,BASP1,C9orf24,CAPN9,CC2D2A,CCDC113,CCDC19,CD19,CDH26,CFB,CHST9,CLIC6,COBL,CR1,CR2,CXXC5,DHCR24,DNAH5,DNAH9,DNAI1,DNAI2,DNER,DYNLRB2,EFCAB1,EFHC1,EML6,ENKUR,EPB41L4B,FAM3D,FBXO15,FLJ23834,FOXJ1,GCLM,GOLSYN,IFT172,IFT57,IL20RA,IQCA1,KATNB1,LRRC10B,LTF,MAP3K7IP1,MFSD4,MS4A8B,MUC13,MYO1D,NBEA,NMU,NQO1,OMG,OSCP1,PACRG,POR,PRR18,PTGR1,PTPR…	ABCA13,ABLIM1,AGBL2,AGR2,AK7,ALDH1L1,AQP3,ARMC2,ARMC3,ARMC4,ASS1,ATP10B,B3GNT7,BACE2,BANK1,BASP1,C21orf63,C2orf40,C6orf165,C9orf135,C9orf24,CAPN9,CC2D2A,CCDC113,CCDC19,CCNO,CCPG1,CD19,CDH26,CES1,CFB,CGN,CHST6,CHST9,CKB,CLDN10,CLDN23,CLIC6,COBL,CR1,CR2,CRYL1,CXXC5,DHCR24,DNAH2,DNAH5,DNAH7,DNAH9,DNAI1,DNAI2,DNAL1,DNALI1,DNER,DUOX1,DYNLRB2,DYX1C1,EFCAB1,EFHB,EFHC1,ELF3,EML6,ENKUR,EPB41L4B,EZR,FAM131…
MSigDB Perturbation	Genes within amplicon 17p11 identified in a copy number alterations study of 191 breast tumor samples.	2.93879e-10	1.77758e-07	4.81496	3.94603	19	31	8	9	11	ALDH3A1,ALDH3A2,MFAP4,RNF112,SLC47A1,SLC47A2,ULK2,b9	ALDH3A1,ALDH3A2,EPN2,MFAP4,RNF112,SLC47A1,SLC47A2,ULK2,b9
MSigDB Perturbation	Genes within amplicon 11q12-q14 identified in a copy number alterations study of 191 breast tumor samples.	3.2565e-09	1.3683e-06	1.61546	90.3769	146	710	57	87	143	AIP,ANO1,B3GNT6,C11orf73,CCDC89,CCND1,CCS,CD5,CHRDL2,CLNS1A,CREBZF,CTTN,DAGLA,DDB1,DGAT2,DHCR7,DPP3,EED,FADD,FGF3,GAB2,GAL,GDPD4,IGHMBP2,KLC2,MRGPRD,NARS2,NEU3,ODZ4,P4HA3,PAK1,PELI3,PGM2L1,PICALM,POLD4,PPFIA1,PRKRIR,RBM14,RCE1,RNF169,SAPS3,SDHAF2,SERPINH1,SHANK2,SLCO2B1,SPCS2,SPTBN2,SYT7,SYTL2,TMEM109,TMEM138,TPCN2,USP35,UVRAG,VWCE,WNT11,XRRA1	ACER3,AIP,ALG8,ANO1,ARRB1,B3GNT6,C11orf30,C11orf73,CABP4,CCDC89,CCND1,CCS,CD5,CD6,CHRDL2,CLCF1,CLNS1A,CPT1A,CREBZF,CTTN,DAGLA,DDB1,DGAT2,DHCR7,DPP3,EED,FADD,FGF19,FGF3,FGF4,GAB2,GAL,GDPD4,GDPD5,IGHMBP2,KCNE3,KLC2,LRFN4,LRRC32,MAP6,ME3,MRGPRD,MTL5,NARS2,NDUFV1,NEU3,NPAS4,ODZ4,OR2AT4,P4HA3,PAK1,PELI3,PGM2L1,PICALM,PITPNM1,POLD3,POLD4,PPFIA1,PPME1,PRKRIR,RAB1B,RBM14,RCE1,RNF169,RPS3,RSF1,SAPS3,SDHAF…
MSigDB Perturbation	Down-regulated genes distinguishing between two groups of non-BRCA1/BRCA2 [Gene ID=672, 675] breast tumors (BRACx): group A vs group B.	6.82451e-09	2.52109e-06	3.26326	8.27394	27	65	7	9	12	BANP,EHD1,EP300,EVI5,MLLT4,NAP1L1,SVIL	BANP,EHD1,EP300,EVI5,FKBP8,METAP2,MLLT4,NAP1L1,SVIL
MSigDB Perturbation	Genes up-regulated in chronic lymphocytic leukemia (CLL) samples bearing deletions in the 13q14 region.	4.10542e-08	1.05596e-05	1.6593	68.1009	113	535	42	51	83	ADAM17,ADRA1A,ARHGAP20,ASPHD1,BBX,CDC27,CENPJ,CEP250,CLASP1,CYB5A,FANCI,FRS2,GINS4,GLIPR1,HIST1H4C,HIST1H4H,IMPA1,INCENP,KIAA1033,KLHL5,LONRF3,MAPK1,MED6,NEDD4L,PAFAH1B1,PHTF2,PLRG1,PTPRO,RASGEF1B,RHOXF2B,RPAIN,RUFY3,SGK3,SPACA3,SPNS1,TBC1D8,TPD52,TRIM38,UBE2Q1,USP6NL,ZBTB44,ZNF226	ADAM17,ADRA1A,ARHGAP20,ASPHD1,ATAD2,BBX,C6orf125,CDC27,CENPJ,CEP250,CLASP1,CLPB,CYB5A,FANCI,FRS2,GINS4,GLIPR1,HIST1H4C,HIST1H4H,IMPA1,INCENP,KIAA1033,KLHL5,LONRF3,MAPK1,MED6,NDRG2,NEDD4L,PAFAH1B1,PHTF2,PLRG1,PPTC7,PTPRO,RAB1A,RASGEF1B,RHOXF2B,RPAIN,RUFY3,SGK3,SLC15A2,SPACA3,SPNS1,TBC1D8,TPD52,TRIM38,UBE2Q1,USP6NL,ZBTB44,ZNF226,ZNF24,ZNF572
MSigDB Perturbation	Genes up-regulated in SCLC (small cell lung cancer) cells with acquired resistance to ABT-737 [PubChem=11228183], an inhibitor of the BCL2 [Gene ID=596] family proteins.	4.24704e-08	1.0873e-05	2.08275	27.3677	57	215	16	23	34	D4S234E,DCX,ELAVL3,FSCN1,GNG2,GPX2,HOXB9,ITM2C,KCNK16,NPTX2,OLFM1,PPP2R2C,RTN1,SST,STMN2,VCX	ATP8B2,CD81,D4S234E,DCX,ELAVL3,FLNC,FSCN1,GNG2,GPX2,HOXB9,IGSF9,ITM2C,KCNK16,KCNT1,NPTX2,OLFM1,PNMA2,PPP2R2C,RTN1,SST,STMN2,TAGLN2,VCX
MSigDB Perturbation	List of genes in the 19q13 amplicon region based on a copy number alterations study of a panel of 16 pancreatic cancer cell lines and 31 primary tumors.	1.0831e-07	2.48405e-05	3.437	6.10999	21	48	10	13	26	AKT2,GMFG,IL29,MAP3K10,PLD3,PSMC4,SAMD4B,SUPT5H,TTC9B,ZNF546	AKT2,GMFG,IL29,LRFN1,MAP3K10,PAF1,PLD3,PSMC4,SAMD4B,SUPT5H,TTC9B,ZFP36,ZNF546
MSigDB Perturbation	Cluster d: genes identifying an intrinsic group in head and neck squamous cell carcinoma (HNSCC).	1.09935e-07	2.51084e-05	3.1424	7.63748	24	60	10	11	37	ABI3BP,AGR2,CCL19,DTNB,KIAA1324,LTF,SCGB3A1,SLC34A2,SORBS2,TFF3	ABI3BP,AGR2,CCL19,DTNB,KIAA1324,LTF,SCGB3A1,SLC34A2,SORBS2,TFF3,TMC5
MSigDB Perturbation	The 'NPM1-mutated signature 2': genes down-regulated in pediatric AML (acute myeloid leukemia) samples with mutated NPM1 [Gene ID=4869] compared to the AML cases with the intact gene and without recurring cytogenetic anomalities or M7 phenotype.	3.88866e-07	7.45796e-05	1.5712	75.7384	119	595	38	57	77	ABCG1,ACLY,ADAR,ARID3B,ARL4C,C20orf103,CARM1,CD34,CHST7,DGKD,EFCAB1,EHD1,EIF3D,ELAVL1,FAM134B,FHL1,FXYD5,GDI2,GPI,GPR6,KCNQ1,LAX1,LPAR6,LRP4,LRRN2,LTBP4,MEF2A,PPM1F,PPP1R16B,RAB4A,RERE,RRP9,SLC9A3R1,STK10,SYNJ2,TMPRSS2,UBE2L3,UXT	ABCG1,ACLY,ADAR,ALDOA,ARID3B,ARL4C,C20orf103,CARM1,CD34,CHST7,DGKD,DSC1,EFCAB1,EHD1,EIF3D,EIF4B,EIF6,ELAVL1,FAM134B,FHL1,FXYD5,GDI2,GPI,GPR6,GRHPR,GUCY1B3,HOXC4,KCNQ1,LAX1,LDHA,LDLR,LPAR6,LRP4,LRRN2,LTBP4,MEF2A,MLNR,MMP15,MRC1,NBL1,PPM1F,PPP1R16B,RAB4A,RARA,RERE,RRP9,SERPINF1,SLC9A3R1,SORBS3,STK10,SYNJ2,TCF7,TMPRSS2,UBE2L3,UTP11L,UXT,WDR1
MSigDB Perturbation	Genes down-regulated in response to both hypoxia and overexpression of an active form of HIF1A [Gene ID=3091].	5.30457e-07	9.54181e-05	1.33022	207.485	276	1630	104	177	285	AASDHPPT,AKAP1,ATP13A3,C3orf52,CBWD2,CCNE1,CDC2,CENPN,CORT,CPN2,CSE1L,CTPS,DBF4,DDX11,DDX18,DDX19B,DDX23,DHCR24,DHCR7,DHFR,DHX35,DKC1,EEF1E1,ELOVL6,EXO1,EXOSC2,FANCI,FREQ,FUS,GEMIN6,GINS1,GINS3,GK,GLRX2,GPD1L,GRWD1,GTPBP4,HEATR3,HJURP,HMGA1,HNRNPD,HNRNPU,IDH3A,ILF3,KIAA0020,KIAA0564,LETM1,MAD2L1,MAP2K3,MCFD2,MELK,MLLT10,MPHOSPH9,MRPL46,MRPS12,MTHFD1,NARS2,NOL11,NOP56,NUP85,ODC1,PARP1,PET112L,PFAS…	AASDHPPT,ABCF2,AKAP1,ASF1B,ATIC,ATP13A3,BARD1,BRCA1,C12orf48,C17orf80,C1QBP,C1orf163,C3orf52,CBWD1,CBWD2,CCDC99,CCNA2,CCNE1,CCNE2,CDC2,CDC6,CDC7,CENPN,CISD1,CLPB,CORT,CPN2,CSE1L,CTPS,DBF4,DDX11,DDX18,DDX19B,DDX23,DHCR24,DHCR7,DHFR,DHX35,DKC1,EEF1E1,EIF2B3,EIF2S1,ELOVL6,ENPP1,ERCC6L,EXO1,EXOSC2,FAM136A,FANCI,FBXO42,FBXO5,FERMT1,FREQ,FUS,GEMIN6,GINS1,GINS2,GINS3,GK,GLRX2,GMNN,GNPDA1,GPD1L,GRWD1,GTP…
MSigDB Perturbation	Top 200 marker genes down-regulated in the 'proliferation' subclass of hepatocellular carcinoma (HCC); characterized by increased proliferation, high levels of serum AFP [Gene ID=174], and chromosomal instability.	5.90387e-07	0.000102837	1.5095	90.7588	137	713	53	83	154	ABAT,ACADL,ADH4,ADRB2,AGXT,AGXT2L1,ALDH1L1,ALDH3A2,ALDH5A1,ANGPTL3,AQP9,BHMT,C6,C8A,CAT,CDC14B,CLDN14,CTH,CYP2J2,CYP8B1,ECM2,EHHADH,F8,FGF2,FMO4,GPT2,HAO1,HIBADH,HPD,HSD11B1,HSD17B6,KLF9,LDHD,MAT1A,MPDZ,MTHFD1,MYRIP,NAT2,NR1I3,NUDT6,OGDHL,OTC,PFKFB1,POR,RGN,SERPINA10,SLC10A1,SLC2A2,SLC38A4,SRD5A1,SYTL4,TST,WNK3	AASS,ABAT,ABCB4,ABCG8,ACADL,ACYP2,ADH4,ADRB2,AGXT,AGXT2L1,ALDH1L1,ALDH3A2,ALDH5A1,ALDH6A1,ANGPTL3,AQP9,BAAT,BHMT,BLOC1S1,BOK,BTD,C6,C8A,CAT,CDC14B,CLDN14,CTH,CYP2J2,CYP8B1,DAO,ECHDC3,ECM2,EHHADH,ETNK2,F8,FGF2,FMO4,GPT2,GRHPR,HAAO,HAO1,HIBADH,HPD,HSD11B1,HSD17B6,KLF9,LDHD,MAT1A,MLYCD,MPDZ,MTHFD1,MYO1B,MYRIP,NAT2,NR1I2,NR1I3,NUDT6,OGDHL,OTC,PCK1,PDK4,PFKFB1,PIPOX,PNPO,POR,RCL1,RGN,RHOB,RORC,SEC14L2…
MSigDB Perturbation	Genes up-regulated in robust Cluster 2 (rC2) of hepatoblastoma samples compared to those in the robust Cluster 1 (rC1).	9.27892e-07	0.000147613	1.21317	455.83	553	3581	225	358	599	AARS,AATF,ACLY,ACTR3B,ADSL,AGBL5,AGFG1,AGPAT5,AK3L1,ALDH18A1,AMD1,AP2B1,ARFGEF1,ARMC9,ATP2B1,ATP6V1H,BRCA2,BUB1,BUB3,C13orf34,C14orf166,C18orf10,C2orf3,CALU,CANX,CAPRIN1,CCNB1IP1,CCNB2,CCNE1,CCT4,CD164,CDC2,CDC25A,CDC27,CDKAL1,CDKN3,CENPI,CENPN,CEP57,CHD7,CKAP5,CLNS1A,CNOT6,COPS5,CSE1L,CSNK2A1,CXCR7,DBF4,DDX1,DDX10,DDX18,DDX27,DDX39,DDX41,DGKD,DGUOK,DKC1,DLGAP5,DNAJC10,DNMT1,DNMT3A,DPH5,DTL,E2F5,…	AARS,AATF,ABCF2,ACLY,ACTR3B,ADSL,AGBL5,AGFG1,AGPAT5,AHCY,AK3L1,ALDH18A1,AMD1,AP1G2,AP2B1,ARFGEF1,ARMC9,ATIC,ATP2B1,ATP5G2,ATP6V1H,BCCIP,BLMH,BRCA2,BUB1,BUB3,BZW2,C13orf34,C14orf166,C18orf10,C1QBP,C21orf45,C22orf9,C2orf3,CALU,CANX,CAPRIN1,CCDC88A,CCDC99,CCNA2,CCNB1IP1,CCNB2,CCNE1,CCT2,CCT4,CD164,CDC2,CDC25A,CDC25C,CDC27,CDC6,CDCA8,CDKAL1,CDKN3,CENPI,CENPN,CEP57,CHD7,CHEK1,CHEK2,CKAP5,CLNS1A,CNOT6,…
MSigDB Perturbation	Genes down-regulated in MCF7 cells (breast cancer) under hypoxia conditions.	9.48098e-07	0.000150392	1.44978	110.362	160	867	55	101	150	ALDH4A1,AMD1,ATP6V0A2,C2CD2,CA2,CALM1,CALM2,CCND3,CENPN,CHKA,CTPS,CXCL12,CYB561,EEF1E1,ELMO2,ESR1,FKBP4,GCH1,GLUD2,GPATCH2,GULP1,HHEX,HSPA4,HSPH1,IDH3A,JAK2,KLC2,KPNA1,KPNA4,LARS2,MAPK1,MRPS12,NETO2,ODC1,PIK3R3,PSEN2,RAB35,RET,RPP25,RRP15,SDF2L1,SEC23IP,SFRS1,SLC24A3,SLC35B1,SLCO3A1,SNRNP40,SOBP,SORT1,SPAG1,SPDEF,TMEM33,TMEM50B,TOR3A,URB2	ABCF2,ACOT7,ADORA1,ALDH4A1,AMD1,ATP2A3,ATP6V0A2,BAK1,BC070039,C12orf5,C14orf169,C22orf9,C2CD2,CA2,CALM1,CALM2,CALM3,CCND3,CDV3,CEBPA,CENPN,CHKA,CORO1A,CTPS,CXCL12,CYB561,DDX3X,DNAJA1,EEF1E1,EIF5A,ELMO2,ESR1,ETF1,FKBP4,GCH1,GLUD2,GLYR1,GNA13,GPATCH2,GPR56,GULP1,GYG1,HHEX,HNRNPH1,HSPA4,HSPH1,IDE,IDH3A,JAK2,KIAA0317,KLC2,KPNA1,KPNA4,LARS2,LRRC59,MAPK1,MAPKAPK2,MRPS12,NETO2,NR1H3,NR2F6,ODC1,OSTM1,PIK…
MSigDB Perturbation	Cluster 2: genes up-regulated in B493-6 cells (B lymphocytes) by serum alone or in combination with MYC [Gene ID=4609] but not by MYC alone.	1.19243e-06	0.000182827	1.63447	56.8993	93	447	37	66	108	ABLIM1,ADA,AIP,BRD3,CABIN1,ERP44,ICT1,IGFBP2,KCNH2,KDM5C,KIAA0892,LPCAT1,MAP4,MED24,MED6,MPHOSPH9,NCOR2,NPIPL3,NR2E3,NUP50,PMS2L3,PPP5C,PRPF19,RALA,RER1,RGS10,SLC2A5,SORL1,SUPT5H,SYMPK,TFF2,TMEM109,UBE2M,UBE2S,ZFP36L2,ZNF148,ZNF593	ABLIM1,ADA,AHCYL1,AIP,BCR,BRD3,CABIN1,CASR,CLPTM1,CTRL,EIF4A1,ERCC1,ERP44,GLS2,HDGF,ICT1,IGFBP2,KCNAB2,KCNH2,KDM5C,KIAA0892,LCK,LPCAT1,LSM12,MAP4,MAST1,MED24,MED6,MLF2,MPHOSPH9,MTF1,NCOR2,NDUFV1,NKTR,NPIPL3,NR2E3,NUP50,OSM,OTUB1,PDAP1,PKM2,PMS2L3,PPP5C,PRPF19,PSMD11,PURA,RAD54L2,RALA,RER1,RGL1,RGS10,RNF8,SLC2A5,SORL1,SUPT5H,SUPT6H,SYMPK,TFF2,TMEM109,UBE2M,UBE2S,UBTF,YWHAE,ZFP36L2,ZNF148,ZNF593
MSigDB Perturbation	Selected genes up-regulated in peripheral blood monocytes (PBMC) of patients with hepatocellular carcinoma (HCC) compared to those with chronic hepatitis.	1.20746e-06	0.000184106	1.45308	106.67	155	838	45	64	88	APAF1,APBB1,ATF6,AXIN2,CANX,CAT,CENPC1,CSE1L,CTSS,CUL1,GLRX2,HLA-DOA,HNRNPR,HNRNPU,HSF2,HSP90AA1,HSPA4,ITPR1,JAK1,KPNA4,MAP3K5,MAPKSP1,MPHOSPH6,MYC,PCNA,PTPRC,RANBP2,RNASE4,RNMT,SFRS1,SOD2,ST13,TACC1,TLR2,TRA,TRA@,TXN,UBE2L3,UBE2NL,UBE2V2,UBE3A,USP14,USP7,USP8,YME1L1	APAF1,APBB1,ATF2,ATF6,AXIN2,CANX,CAT,CENPC1,CSE1L,CTSS,CUL1,FBXO5,GLRX2,GPX3,HAT1,HIF1A,HLA-DOA,HNRNPA1,HNRNPK,HNRNPR,HNRNPU,HSF2,HSP90AA1,HSPA4,ITPR1,JAK1,KPNA4,MAP3K5,MAPKSP1,MPHOSPH6,MTCP1NB,MYC,PCNA,PIK3CA,PPP3R1,PRDX3,PTPRC,RANBP2,RNASE4,RNMT,SFRS1,SMNDC1,SOD2,ST13,TACC1,TLR2,TNPO1,TRA,TRA@,TRAF6,TXN,UBE2A,UBE2D1,UBE2D2,UBE2D3,UBE2L3,UBE2N,UBE2NL,UBE2V2,UBE3A,USP14,USP7,USP8,YME1L1
MSigDB Perturbation	Genes down-regulated in the MM1S cells (multiple myeloma) after treatment with aplidin [PubChem=44152164], a marine-derived compound with potential anti-cancer properties.	1.43295e-06	0.000210893	1.26778	284.751	361	2237	122	181	251	ACLY,AGBL5,AGPAT5,AKAP11,AKT3,ALDH5A1,ATP13A3,ATP8A1,ATXN1,AVL9,BICD2,BLM,BUB1,C18orf10,C19orf2,CALM1,CALM2,CAMSAP1,CASP6,CCNE1,CDC42BPA,CLTC,CNOT1,CSE1L,CSNK2A1,CSNK2A1,CTNNA1,CTPS,CUL3,DDAH1,DEK,DEPDC6,DHCR24,DLGAP5,DSP,DUT,ECT2,EDEM3,ELAVL1,ENO2,EPRS,FAM20B,FANCI,FUT8,GINS1,GMPS,GNB1,GPI,GPR161,HDAC9,HJURP,HNRNPD,HNRNPR,IMPDH1,IPO5,KCTD12,KIAA1026,KIF4A,LBR,LPCAT1,LYPLA1,MACF1,MBNL1,MELK,MFHAS…	ACLY,ADD3,AGBL5,AGPAT5,AHCY,AKAP11,AKT3,ALDH5A1,ARHGAP19,ATP13A3,ATP8A1,ATXN1,AVL9,BICD2,BLM,BUB1,C18orf10,C19orf2,CALM1,CALM2,CALM3,CAMSAP1,CASP6,CBFB,CBX5,CCNA2,CCNE1,CD9,CDC42BPA,CDC7,CDCA8,CERK,CHD4,CLTC,CMPK1,CNOT1,CPNE3,CSE1L,CSNK2A1,CSNK2A1,CTNNA1,CTPS,CUL3,DCP2,DDAH1,DDX46,DEK,DEPDC6,DERL1,DHCR24,DLGAP5,DSP,DUT,ECT2,EDEM3,EIF4B,EIF4G1,ELAVL1,ENO2,EPRS,ERCC6L,FAM20B,FANCI,FBXO5,FERMT1,FUT8…
MSigDB Perturbation	Genes down-regulated in non-metastatic breast cancer tumors having type 1 amplification in the 20q13 region; involves ZNF217 [Gene ID=7764] locus only.	2.07137e-06	0.000286469	1.37618	144.603	199	1136	88	168	303	APBA1,ARHGAP17,ARHGEF11,ARHGEF2,ATN1,B4GALT1,BAZ1B,BRD1,C20orf54,CHRNB2,CIC,CNTROB,CRYGS,CTNND1,DCLRE1C,DDX11,DMWD,DRG2,EHMT2,ENGASE,EYA3,FKBP1A,FMN2,GATAD2A,GLP1R,GLTSCR1,GRAMD4,HIRA,HNRNPD,ILF3,KCTD13,KDM4A,LARP1,LIMK2,LMNA,LPAR2,LSM14B,MAPRE3,MARK2,MCTP2,MEF2D,MINK1,MYL10,MYO9B,NOL8,NPIPL3,NUP214,PHF21A,PICK1,PPM1G,PPP1R12C,RANBP3,RAP1GAP2,RBBP6,RBM14,RBM15B,RBM33,RCC1,RHEB,RUNX3,SAPS2,SCUBE1,…	ACIN1,AGRN,AMPD2,APBA1,ARHGAP17,ARHGEF11,ARHGEF2,ARPC5L,ATF5,ATN1,ATXN2L,B4GALT1,BAZ1B,BRD1,C14orf166B,C20orf54,C6orf125,CDC42EP1,CHRNB2,CIC,CNTROB,CRYGS,CSNK1E,CTNND1,DCAF8,DCLRE1C,DDX11,DENND5A,DMWD,DRG2,EHMT2,ENGASE,EPN1,EVI5L,EYA3,FAM57B,FBXL19,FBXO46,FKBP1A,FMN2,FOXO4,FTSJD2,FURIN,FXR2,GATAD2A,GBA2,GLP1R,GLTSCR1,GRAMD4,GRIP2,HCFC1,HDAC7,HEYL,HIP1R,HIRA,HNRNPD,HPCA,ILF3,KCTD13,KDM4A,KHSRP,KIA…
MSigDB Perturbation	Genes up-regulated in metastatic tumors from the whole panel of patients with prostate cancer.	5.05176e-06	0.000581723	1.43744	100.178	144	787	41	67	95	ADAM17,AK3L1,AP2B1,ATXN2,BASP1,BPTF,DDX17,DNAJC3,E2F3,EIF2C2,FOLH1,FSCN1,G3BP1,GRAMD4,GRB2,HS6ST1,HSPA6,LARP1,LYN,MTF2,NCK2,NFATC1,NGF,NPIPL3,PAICS,RAB6B,RAD23B,RALA,RBBP5,RBBP6,RIPK2,RNF216,SEL1L,TGFBRAP1,THBS2,TRIM3,TRIO,VEGFA,WNK1,ZBTB7A,ZMYND8	ADAM17,AK3L1,AP2B1,ATXN2,BASP1,BPTF,CDKN2D,CLDN5,CUGBP1,DDIT4,DDX17,DNAJC3,E2F3,EIF1AX,EIF2C2,EPB41,ESR2,FOLH1,FSCN1,G3BP1,GRAMD4,GRB2,GSK3B,HBB,HBD,HBE1,HOXC6,HS6ST1,HSPA1A,HSPA6,LARP1,LRRC37A2,LYN,MTF2,NBPF10,NCK2,NFATC1,NGF,NKTR,NPIPL3,P4HA1,PAICS,PCTK3,PDLIM5,PRKAB2,PRRC1,RAB6B,RAD23B,RALA,RBBP5,RBBP6,RIPK2,RNF216,SEL1L,SLC16A1,SPP1,STARD7,TGFBRAP1,THBS2,TRIM3,TRIO,TYRO3,VCAN,VEGFA,WNK1,ZBTB7…
MSigDB Perturbation	Top genes down-regulated in liver tissue from mice with knockout of ZMPSTE24 [Gene ID=10269].	9.38991e-06	0.000962475	1.81292	29.7862	54	234	17	19	37	ALDH1A1,ALDH3A2,ALDOB,CA13,CA3,CAT,CCRN4L,EHHADH,FABP1,HSD17B10,IDI1,IFI27L1,LASP1,OTC,PHLDA1,RGN,S100A10	ALDH1A1,ALDH3A2,ALDOB,CA13,CA3,CAT,CCRN4L,EHHADH,FABP1,HSD17B10,IDI1,IFI27L1,LASP1,OSTC,OTC,PHLDA1,RGN,S100A10,SLC31A1
MSigDB Perturbation	Genes up-regulated in erythroid progenitor cells isolated from bone marrow of patients with Diamond-Blackfan anemia (DBA) and mutated RPS19 [Gene ID=6223].	9.78146e-06	0.00099153	2.07623	17.8208	37	140	15	19	27	C17orf42,CSF1,DPY19L1,DRAM1,HNRNPR,LIMK2,NSF,NUFIP1,NUP62CL,PDK3,PRKX,SESN1,SOS1,SPHK2,TRIM38	AEN,ATP6V1B2,C17orf42,CSF1,DPY19L1,DRAM1,HNRNPR,LIMK2,NSF,NUFIP1,NUP62CL,PDK3,PRKX,SCRN1,SESN1,SOS1,SPHK2,TRIM38,UTP6
MSigDB Perturbation	Down-regulated genes that vary between HNSCC (head and neck squamous cell carcinoma) groups formed on the basis of their level of pathological differentiation: moderately vs poorly differentiated tumors.	1.06743e-05	0.00106633	1.95264	22.0214	43	173	19	27	52	ANP32A,CSPP1,E2F3,EIF2S2,FANCI,FUS,GPR161,HIST1H4C,HIST1H4H,IPO5,IPO9,KNTC1,LPCAT3,NCAPG,ORC1L,POP4,PRMT1,RAMP1,SFRS1	ANP32A,CDC25C,CSPP1,CUGBP1,E2F3,EIF2S2,FANCI,FTSJD2,FUS,GPR161,HIST1H4C,HIST1H4H,IPO5,IPO9,KNTC1,LPCAT3,NAT10,NCAPG,ORC1L,POP4,PRMT1,RAMP1,SFRS1,SFRS3,SNRPA1,TGIF2,ZNF286A
MSigDB Perturbation	Down-regulated genes in cervical carcinoma and head and neck tumors positive for human papilloma virus (HPV) compared to those negative for HPV.	1.37753e-05	0.00131867	2.5449	9.03769	23	71	6	6	10	CAV1,CCND1,CTTN,KLK8,KLK9,KRTDAP	CAV1,CCND1,CTTN,KLK8,KLK9,KRTDAP
MSigDB Perturbation	Genes whose expression profile is specific to Cluster III of urothelial cell carcinoma (UCC) tumors.	1.62157e-05	0.00147531	1.24982	257.638	322	2024	128	206	328	ABP1,ADAM17,AK2,AKR7A2,ATP6V1C1,BCL2L1,BTG3,BUB1,C13orf27,C19orf2,C3orf26,C6orf1,CCNB2,CCNE1,CDC2,CDC25A,CDKN2C,CENPE,CENPN,CPD,CSRP2BP,CSTF2,CTPS,CXCL14,DAB2,DAPK1,DBF4,DDAH1,DEK,DEPDC1,DLGAP5,E2F8,ERBB2,EXO1,EZH2,FAF1,FIGNL1,GGCT,GGH,GNB3,GUCY1A3,H2AFZ,HIST1H1C,HMGB2,ING1,ITPR1,KIF11,KIF4A,KIFAP3,KPNA4,MAD2L1,MELK,METTL2A,MKRN2,MLF1IP,MLLT4,MOBP,MORC4,MRPS12,MTHFD2,NCAPG2,NCOA6,NDUFA9,NEDD9,NET…	ABP1,ACADM,ACSL1,ACSL4,ADAM17,AK2,AKAP12,AKR7A2,ALAS2,ANXA4,AP1S2,ARRB2,ASS1,ATAD2,ATG5,ATP6V1C1,BCAR3,BCL2L1,BRCA1,BTG3,BUB1,C13orf27,C19orf2,C21orf45,C3orf26,C6orf1,CCNB2,CCNE1,CDC2,CDC25A,CDC6,CDC7,CDCA8,CDKN2C,CENPE,CENPN,CKS1B,CLPTM1L,COPB2,CPD,CRIPT,CSRP2BP,CSRP3,CSTF2,CSTF3,CTPS,CXCL14,DAB2,DAPK1,DBF4,DBI,DDAH1,DEK,DEPDC1,DLGAP5,E2F1,E2F8,ERBB2,EXO1,EZH2,FABP3,FAF1,FAM136A,FAM83D,FIGNL1,GA…
MSigDB Perturbation	Genes in the most frequently gained loci in a panel of glioma cell lines.	1.63639e-05	0.00148633	1.3499	135.565	183	1065	44	59	83	AHR,BCL3,CALCR,CHST1,CKM,CREB3L1,DGKI,DPF1,ECT2,ELMO1,F2,FOLH1,FOSB,GALNT10,GALNT11,GALNT5,GALNT7,GEMIN7,LRP4,MAPK8IP1,MARK4,MLL3,MLL5,NLGN1,ORC5L,PCDH18,PIK3CG,PRKAG2,PTPRJ,PTPRN2,RELB,RELN,RHEB,SIPA1L3,SLC7A11,SMARCD3,SPATA16,SYT13,TRIM28,UBE2M,VIPR2,XRCC2,ZNF132,ZNF584	ABCF2,AHR,APOC1,BCL3,CALCR,CHRM4,CHST1,CKM,CLPTM1,CREB3L1,CRY2,DGKI,DGKZ,DPF1,ECT2,ELMO1,ERCC1,F2,FOLH1,FOSB,GALNT10,GALNT11,GALNT5,GALNT6,GALNT7,GEMIN7,LECT1,LRP4,MAPK8IP1,MARK4,MLL3,MLL5,MYBPC3,NLGN1,NR1H3,ORC5L,PACSIN3,PCDH18,PIK3CG,PPP1R13L,PRKAG2,PTPRJ,PTPRN2,RELB,RELN,RHEB,SIPA1L3,SLC35C1,SLC7A11,SMARCD3,SPATA16,SPI1,SYT13,TRIM28,UBE2M,VIPR2,XRCC2,ZNF132,ZNF584
MSigDB Perturbation	Top 20 negative significant genes associated with synovial sarcoma tumors.	2.65145e-05	0.00220792	6.73371	0.89104	6	7	5	5	8	C7,CTSS,LGALS9,RARRES3,RNASE6	C7,CTSS,LGALS9,RARRES3,RNASE6
MSigDB Perturbation	Genes down-regulated in normal tissue adjacent to liver tumor, compared to the normal liver samples.	3.31462e-05	0.00264799	1.20703	340.504	411	2675	140	208	366	AARS,ABHD10,ACADSB,ADH4,ADI1,AGMAT,ALDH7A1,ALG9,ANGPTL3,ANXA10,ARHGAP10,ARNT,ATP1B1,ATP6V0E2,BCL2L13,C14orf147,CADM1,CALML3,CAMK1,CBARA1,CCRN4L,CD99L2,CENPV,CLDN3,CLPP,CNOT2,CSK,CYB5B,CYP39A1,DBH,DDX18,DGAT2,DIAPH1,DYNLL2,DYSF,EFHD2,EML4,EMP1,ERLIN1,EVL,F8A3,FAM20B,FGGY,FKBP4,FOXD4L4,GALM,GLUD1,GOT2,GPR88,GPT2,H3F3B,HEPACAM,HIST1H4C,HIST1H4H,HMGCR,HMGCS1,HPD,HPS6,IRF8,KHDRBS3,KIAA0182,KPNA1,LASP1…	AARS,ABCC2,ABHD10,ABHD6,ACADSB,ACTG1,ADH4,ADI1,AGMAT,AGPAT2,AGT,AHCY,ALDH7A1,ALG9,ALPL,ANGPTL3,ANXA10,APH1A,ARHGAP10,ARNT,ATF5,ATP1B1,ATP6V0E2,BCL2L13,BOK,C14orf147,C9orf103,CADM1,CALML3,CAMK1,CAPN6,CBARA1,CBX7,CCRN4L,CD99L2,CDA,CENPV,CLDN2,CLDN3,CLPP,CLPTM1,CNOT2,CSK,CYB5B,CYGB,CYP39A1,DBH,DDX18,DGAT2,DHRS7,DIAPH1,DNAJA1,DONSON,DYNLL2,DYSF,EEF2K,EFHD2,EIF2AK1,EIF4A1,EML4,EMP1,ERLIN1,EVL,F8A3,FAM…
MSigDB Perturbation	Genes up-regulated in myeloid progenitor cells isolated from bone marrow of patients with Diamond-Blackfan anemia (DBA) and mutated RPS19 [Gene ID=6223].	3.80435e-05	0.00293693	1.67744	35.7689	60	281	18	24	29	ARFGEF1,CA2,CENPN,CREM,FOSL2,FRY,IPCEF1,NECAP1,NR4A3,PDE4A,POLS,PPAP2A,RAB20,SFRS1,SLC4A7,TRIM38,ZMAT3,ZNF451	ARFGEF1,CA2,CAPN7,CENPN,CREM,FOSL2,FRY,HBEGF,IPCEF1,MAP4K5,MFSD5,MTMR11,NECAP1,NR4A3,PDE4A,POLS,PPAP2A,RAB20,SEC24A,SFRS1,SLC4A7,TRIM38,ZMAT3,ZNF451
MSigDB Perturbation	Genes down-regulated in pre B lymphocyte after induction of physiological DNA double-strand breaks (DSB) by RAG2 [Gene ID=5897]; the changes are independent of ATM [Gene ID=472] signaling.	3.86919e-05	0.0029828	1.43737	80.7027	116	634	31	42	54	ARHGAP26,ARVCF,ASPH,AVL9,CAMK4,DUSP3,EDEM2,FUNDC2,GFOD1,HIPK2,JAKMIP1,KCNQ5,KLRD1,KREMEN1,LIFR,MSH5,NAGLU,NAV2,OSR2,PDXDC1,PDZD2,RASGRP3,RFC3,RGS18,RIOK3,RPAP2,SCN8A,SLPI,SMURF1,SNX10,TSPAN2	ABCA1,ARHGAP26,ARVCF,ASPH,AVL9,CAMK4,CCBE1,CRLF1,DUSP3,EDEM2,EIF2S1,FUNDC2,GFOD1,HIPK2,JAKMIP1,KCNQ5,KLRD1,KREMEN1,LANCL1,LIFR,MSH5,NAGLU,NAV2,OSR2,PCBP4,PDXDC1,PDZD2,PI4K2A,RASGRP3,RFC3,RGS18,RIOK3,RNF122,RPAP2,SCN8A,SLC15A2,SLPI,SMURF1,SNX10,TMEM100,TSPAN2,ZW10
MSigDB Perturbation	Up-regulated at any timepoint following infection of primary human foreskin fibroblasts with CMV	4.12228e-05	0.00314706	1.56318	49.8982	78	392	26	38	60	ATP6V1C1,CSE1L,ENO2,FGFR1,GAL,GCH1,GMPR,IDH3A,IRF2,ITGA8,KDM5C,MANF,MSX1,MX1,MX2,NAMPT,NFKBIA,NR4A3,NUBP1,OAS1,PLA2G4A,PSMD6,SP100,SSR1,UBE2S,WARS	ATP6V1C1,CSE1L,DNAJA1,EIF1AX,ENO2,FGFR1,GAL,GCH1,GMPR,IDH3A,IFI6,IL11,IL6,IL7R,IRF2,ITGA8,KDM5C,MANF,MSX1,MX1,MX2,NAMPT,NFKBIA,NR4A1,NR4A3,NUBP1,OAS1,PLA2G4A,PSMC1,PSMD6,SLC39A14,SNRPA1,SNRPB2,SP100,SSR1,TRIM21,UBE2S,WARS
MSigDB Perturbation	Cellular genes up-regulated in forskin fibroblasts by expression of CMV EI86 protein off an adenovirus vector.	7.31381e-05	0.00495781	1.56685	45.9522	72	361	24	33	48	BLM,BTG3,CASP3,CCNE1,CDC2,CSPG5,DCK,DDX23,DHFR,EZH2,HMGB2,KIF11,MAD2L1,NP,NUP214,PCNA,PPIH,RFC2,RFC3,RRM1,TFAM,UMPS,UNG,ZWINT	BARD1,BLM,BTG3,CASP3,CCNE1,CDC2,CSPG5,DCK,DDX23,DHFR,E2F1,EZH2,HMGB2,KIF11,MAD2L1,MCM5,NP,NUP214,PCNA,POLA1,POLD3,PPIH,RAB27A,RFC2,RFC3,RPA1,RRM1,SLC29A1,TFAM,TPX2,UMPS,UNG,ZWINT
MSigDB Perturbation	Genes up-regulated in biphasic (mixed) vs epithelial subtypes of malignant peritoneal mesothelioma.	7.77082e-05	0.00517206	1.21148	294.68	357	2315	126	216	312	ACAP2,ACBD3,ANXA2,AP2S1,AP3B1,AZIN1,BET1,BICD2,BLVRA,BRP44,BUB3,C1orf156,CALD1,CALU,CCNG1,CDC27,CDC42BPA,CDKN2C,COPS5,CORT,CREBBP,DBN1,DCK,DDX18,DKC1,DOCK1,EIF3H,EPRS,ERGIC3,F8,F8A3,FKBP1A,FKBP4,FNTA,FSCN1,FZD6,G3BP1,GDI2,GINS1,GRB2,H2AFZ,HMGA1,HSPA4,ITGAV,KDM1A,KDM5B,KIF11,KIF2A,KIFAP3,LAMC1,LDOC1,LIN37,LPGAT1,LYPLA1,MAD2L1,MAPK9,MAPKAP1,MSH6,NAP1L1,NCBP2,NDUFS2,PAPOLA,PARK7,PARP1,PCMT1,PCNA,PGC…	ACAP2,ACBD3,ACTL6A,ADNP,AHCY,ANXA2,AP2S1,AP3B1,ATP2A2,AZIN1,BAT2D1,BET1,BICD2,BLMH,BLVRA,BRP44,BUB3,C1orf107,C1orf156,C1orf77,C7orf44,CALD1,CALU,CAPN7,CCNE2,CCNG1,CCT2,CDC27,CDC42BPA,CDKN2C,CGRRF1,CKS1B,COPS5,CORT,CRABP2,CREBBP,DBI,DBN1,DCK,DDX18,DENND5A,DKC1,DNAJA1,DOCK1,EIF3H,EPRS,ERGIC3,F2R,F8,F8A3,FKBP1A,FKBP4,FLNA,FNTA,FSCN1,FTSJ1,FZD6,G3BP1,GARS,GDI2,GINS1,GRB2,H2AFY,H2AFZ,HBXIP,HDGF,HIPK1,…
MSigDB Perturbation	Genes upreglated in peripheral blood lymphocytes (PBL) from patients with well functioning kidneys more than 1-year post transplant compared to those from normal living kidney donors.	0.000101906	0.00633807	1.47607	60.9726	90	479	28	38	43	ABL1,AHR,AMFR,ANP32E,ANXA5,ARFGAP3,BCLAF1,CANX,CDC42EP3,DNAJB6,IMPA1,ITSN2,LY96,LYN,MAPK14,MYL12B,POLS,PPP1R10,PTPN12,RHEB,SLC2A3,SQLE,TRA,TRA@,TRAF3IP2,UBE2E3,USP7,ZBED4	ABL1,AHR,AMFR,ANP32E,ANXA5,ARFGAP3,BCLAF1,CANX,CD53,CDC42EP3,DDX5,DNAJB6,EID1,ETFA,FLI1,IL1B,IMPA1,ITSN2,LY96,LYN,MAPK14,MKNK1,MYL12B,NFYA,PAX8,POLS,PPP1R10,PTPN12,RAB11A,RHEB,SLC2A3,SQLE,TRA,TRA@,TRAF3IP2,UBE2E3,USP7,ZBED4
MSigDB Perturbation	Genes up-regulated in primary cultures of ovarian surface epithlium cells exposed to progesterone [PubChem=5994] for 5 days.	0.000105295	0.00649023	1.25594	196.665	247	1545	70	100	151	ABCG1,ADAMTS20,ARHGEF3,BBS10,BBS7,C10orf12,CCNB2,CDC2,CDKN2C,CENPN,CEP57,CNTN6,CYB5B,DHCR7,DLGAP5,DNAJB9,ELOVL6,ETV1,EVI2A,FADS2,FANCI,GALK2,GK,GK,GPR126,HJURP,HMGB2,HMGCR,HMGCS1,HMGN3,IDI1,ITGBL1,KCNJ16,KDSR,KIAA1009,KIF4A,KLF5,KLF6,LPIN1,MAP7,MLF1IP,MON2,MTF2,NCAPG,NDC80,NEUROD1,NPY,NPY1R,ORC4L,PCSK6,PDS5A,PLA2G4A,RGS2,RIF1,SAMD9,SC4MOL,SC5DL,SEC14L1,SGK1,SGK3,SMC2,SMPDL3A,TLL2,TNFAIP6,TRPC4,TT…	ABCG1,ADAMTS20,AREG,ARHGEF3,BBS10,BBS7,C10orf12,C14orf109,C7orf25,CCNB2,CCRL1,CDC2,CDC6,CDKN2AIP,CDKN2C,CENPN,CEP57,CNTN6,CYB5B,CYP51A1,DHCR7,DLGAP5,DLX4,DNAJB9,ELOVL6,ETV1,EVI2A,FADS2,FANCI,GALK2,GK,GK,GPR126,HAND2,HBB,HBD,HBP1,HBS1L,HJURP,HMGB2,HMGCR,HMGCS1,HMGN3,HNRNPA1,IDI1,IFNAR2,INSIG1,ITGBL1,KCNJ16,KDSR,KIAA1009,KIF4A,KLF5,KLF6,KLHL24,LDLR,LIPG,LPIN1,MAP3K8,MAP7,MDM1,MLF1IP,MON2,MTF2,MVK,N…
MSigDB Perturbation	Genes down-regulated in PCI-35 cells (pancreatic cancer, lack endogenous DUSP6 [Gene ID=1848]) upon expression of DUSP6 off an adenoviral vector.	0.000111869	0.00678896	1.45313	66.0642	96	519	25	42	66	ACOX2,BLM,CCNB2,DLGAP5,DTL,DYSF,EPHA2,ETS1,HJURP,HPCAL1,KHDRBS3,KIF11,KIF20B,LAT2,MAP7,MARCH4,NCAPG,NEDD4L,NGF,PMEPA1,RIOK1,RRM1,SIPA1L3,WDR3,WDR5	ACOX2,ADORA2B,BLM,CALB2,CCNA2,CCNB2,CTNNAL1,DLGAP5,DTL,DYSF,EPHA2,ETS1,GCGR,HJURP,HPCAL1,KHDRBS3,KIF11,KIF20B,LAT2,MAFF,MAFF,MAP7,MARCH4,MCM5,NCAPG,NEDD4L,NGF,ORC6L,PBK,PDSS1,PHLDA2,PMEPA1,PRMT5,RACGAP1,RIOK1,RRM1,SIPA1L3,SLCO2A1,TCHP,TPX2,WDR3,WDR5
MSigDB Perturbation	Marker genes up-regulated in the 'chromosome 7 polysomy' subclass of hepatocellular carcinoma (HCC); characterized by polysomy of chromosome 7 and by a lack of gains of chromosome 8q.	0.000115839	0.00697606	1.48487	57.9176	86	455	29	41	63	ADAMTS17,CLDN14,CLDN3,COBL,CRYAA,ELAVL1,FOLH1,GARNL3,GLCCI1,GPR88,ICA1,LRRC31,MAGEB2,MOGAT3,PEMT,PEPD,PFKFB1,POR,POT1,PRKAG2,PYGL,RAPGEF4,RHOU,SLC28A1,SRD5A1,SYTL4,TM6SF2,TRIM35,WNK3	ABCB4,ADAMTS17,CHN2,CLDN14,CLDN3,COBL,CRYAA,CYP2A6,DAO,ELAVL1,EPHA1,FBXO2,FNDC5,FOLH1,GARNL3,GCGR,GLCCI1,GPR88,HAAO,HAPLN4,ICA1,LRRC31,MAGEB2,MAP1LC3A,MOGAT3,PEMT,PEPD,PFKFB1,POR,POT1,PRKAG2,PYGL,RAPGEF4,RHOU,SLC16A2,SLC28A1,SRD5A1,SYTL4,TM6SF2,TRIM35,WNK3
MSigDB Perturbation	Genes identified by method 2 as coordinately down-regulated late in HMEC cells (mammary epithelium) during acinar development in vitro.	0.000118251	0.00710577	1.2004	309.063	371	2428	118	184	286	AGFG1,ANP32E,ANXA5,AQR,ARL4C,BLM,C11orf24,CALM1,CALM2,CAMSAP1L1,CDC2,CDC25A,CDKN3,CENPN,CKAP5,CNOT7,COL4A2,CSE1L,CSNK2A1,CSNK2A1,DBF4,DDX11,DEPDC1,DHFR,DHX15,DNAJC10,DOCK5,DTL,DUSP4,DUSP6,DUT,EEF1E1,EHD1,EIF5B,ELK3,ELOVL6,EPHA2,EXPH5,FAM3C,FANCI,FASTKD1,FKBP4,GEMIN6,GINS1,GNB1,H2AFZ,HJURP,HPCAL1,HPS1,IDI1,IGF2BP2,ILF3,IMPA1,IMPDH1,IRAK1,ITGB5,KDELR2,KIAA0406,KIAA1644,KIF4A,LAMC2,LYPLA1,MAK16,MANF…	ACTB,ACTG1,ACTN1,AGFG1,ALG8,ANAPC5,ANP32E,ANXA5,AQR,ARL4C,BARD1,BCAR3,BLM,C11orf24,CALM1,CALM2,CALM3,CAMSAP1L1,CAP1,CCT2,CDC2,CDC25A,CDC6,CDC7,CDCP1,CDKN3,CENPN,CKAP5,CKS1B,CLPB,CNOT7,COL4A2,CSE1L,CSNK2A1,CSNK2A1,CYP51A1,DBF4,DDX11,DEPDC1,DHFR,DHX15,DNAJC10,DNM1L,DOCK5,DTL,DUSP4,DUSP6,DUT,EEF1E1,EHD1,EIF5B,ELK3,ELOVL6,EPHA2,ETV4,EXPH5,FAM3C,FANCI,FASTKD1,FERMT1,FKBP4,FLNA,FLNB,FN1,GEMIN6,GFPT1,GI…
HGNC Gene Families	KMT	1.74046e-11	1.57049e-08	2.51568	22.6579	57	178	16	22	23	ASH1L,EHMT1,EHMT2,EZH2,MLL,MLL3,MLL5,NSD1,PRDM2,SETD2,SETD7,SETD8,SETDB2,SUV39H1,SUV39H2,SUV420H1	ASH1L,EHMT1,EHMT2,EZH1,EZH2,MLL,MLL2,MLL3,MLL5,NSD1,PRDM2,SETD1A,SETD1B,SETD2,SETD7,SETD8,SETDB1,SETDB2,SUV39H1,SUV39H2,SUV420H1,SUV420H2
HGNC Gene Families	KLK	5.95342e-10	3.15091e-07	5.13661	3.30958	17	26	9	11	16	KLK1,KLK13,KLK14,KLK2,KLK4,KLK5,KLK7,KLK8,KLK9	KLK1,KLK12,KLK13,KLK14,KLK15,KLK2,KLK4,KLK5,KLK7,KLK8,KLK9
HGNC Gene Families	OR	2.11093e-08	5.89808e-06	2.33146	19.7302	46	155	30	63	375	OR10G2,OR10J1,OR11H4,OR13C9,OR13H1,OR1D4,OR2C1,OR2K2,OR2S2,OR4E2,OR51E2,OR51F1,OR51F2,OR51T1,OR52D1,OR52I2,OR52K1,OR52K2,OR52R1,OR56B4,OR6S1,OR7C2,OR8B12,OR8B4,OR8B8,OR8S1,OR9A2,OR9I1,OR9Q2,X64983	OR10A7,OR10G2,OR10G3,OR10G7,OR10J1,OR10J3,OR11H4,OR11H6,OR13C5,OR13C8,OR13C9,OR13D1,OR13F1,OR13H1,OR1D4,OR1Q1,OR1S2,OR2AT4,OR2C1,OR2K2,OR2S2,OR4B1,OR4D11,OR4E2,OR51D1,OR51E2,OR51F1,OR51F2,OR51I2,OR51L1,OR51M1,OR51Q1,OR51S1,OR51T1,OR51V1,OR52B2,OR52D1,OR52E2,OR52E4,OR52H1,OR52I2,OR52K1,OR52K2,OR52R1,OR52W1,OR56A1,OR56B4,OR5AK2,OR6K3,OR6S1,OR7C2,OR8B12,OR8B2,OR8B4,OR8B8,OR8D4,OR8S1,OR9A2,OR9A4,OR9I…
HGNC Gene Families	USP	1.21172e-07	2.67859e-05	1.7767	46.7159	83	367	28	40	56	USP10,USP12,USP14,USP15,USP18,USP20,USP22,USP24,USP25,USP27X,USP29,USP3,USP31,USP35,USP36,USP4,USP40,USP42,USP43,USP46,USP47,USP48,USP49,USP53,USP54,USP7,USP8,USP9X	USP1,USP10,USP11,USP12,USP13,USP14,USP15,USP18,USP2,USP20,USP22,USP24,USP25,USP26,USP27X,USP28,USP29,USP3,USP30,USP31,USP32,USP35,USP36,USP38,USP4,USP40,USP42,USP43,USP44,USP45,USP46,USP47,USP48,USP49,USP5,USP53,USP54,USP7,USP8,USP9X
HGNC Gene Families	KCN, KV	3.76925e-06	0.000466226	1.42668	107.943	154	848	33	38	40	KCNA1,KCNA10,KCNA2,KCNA4,KCNA5,KCNA6,KCNB1,KCNB2,KCNC1,KCNC2,KCNC3,KCNC4,KCND1,KCND2,KCND3,KCNF1,KCNG1,KCNG2,KCNG3,KCNH1,KCNH2,KCNH3,KCNH5,KCNH7,KCNH8,KCNQ1,KCNQ3,KCNQ4,KCNQ5,KCNS1,KCNS2,KCNS3,KCNV1	KCNA1,KCNA10,KCNA2,KCNA3,KCNA4,KCNA5,KCNA6,KCNB1,KCNB2,KCNC1,KCNC2,KCNC3,KCNC4,KCND1,KCND2,KCND3,KCNF1,KCNG1,KCNG2,KCNG3,KCNG4,KCNH1,KCNH2,KCNH3,KCNH4,KCNH5,KCNH6,KCNH7,KCNH8,KCNQ1,KCNQ2,KCNQ3,KCNQ4,KCNQ5,KCNS1,KCNS2,KCNS3,KCNV1
HGNC Gene Families	PTPN	6.8811e-05	0.00472855	1.95007	17.9481	35	141	11	15	18	PTPN1,PTPN11,PTPN12,PTPN13,PTPN14,PTPN2,PTPN20A,PTPN23,PTPN3,PTPN4,PTPN9	PTPN1,PTPN11,PTPN12,PTPN13,PTPN14,PTPN2,PTPN20A,PTPN21,PTPN22,PTPN23,PTPN3,PTPN4,PTPN5,PTPN6,PTPN9
HGNC Gene Families	RGS	8.10819e-05	0.00531309	1.66642	33.6049	56	264	14	20	21	RGS1,RGS10,RGS12,RGS13,RGS16,RGS17,RGS18,RGS2,RGS20,RGS21,RGS22,RGS6,RGS7,RGS9	RGS1,RGS10,RGS12,RGS13,RGS14,RGS16,RGS17,RGS18,RGS19,RGS2,RGS20,RGS21,RGS22,RGS3,RGS4,RGS5,RGS6,RGS7,RGS8,RGS9
HGNC Gene Families	ZBED	0.000172946	0.00969394	3.32369	3.30958	11	26	4	4	4	ZBED2,ZBED3,ZBED4,ZBED5	ZBED2,ZBED3,ZBED4,ZBED5
HGNC Gene Families	PADI	0.000179181	0.00979411	6.54666	0.763748	5	6	4	4	5	PADI2,PADI3,PADI4,PADI6	PADI2,PADI3,PADI4,PADI6
MGI Expression: Detected	TS25_lens	9.62966e-10	4.73255e-07	1.82245	56.5174	103	444	23	31	35	CAPN3,DIXDC1,FGF2,GABBR2,GABRA1,GABRA2,GABRA3,GABRB2,GABRB3,GABRG1,GABRG2,GABRG3,GAD1,GAD2,GTF2IRD1,HEY1,HEY2,IRF1,IRF2,PAX6,SLC6A1,SLC6A11,SLC6A13	CAPN3,DIXDC1,DLX2,DLX5,EMX1,FGF2,GABBR1,GABBR2,GABRA1,GABRA2,GABRA3,GABRB2,GABRB3,GABRD,GABRG1,GABRG2,GABRG3,GAD1,GAD2,GTF2IRD1,HEY1,HEY2,IRF1,IRF2,PAX6,SLC32A1,SLC6A1,SLC6A11,SLC6A12,SLC6A13,SOD1
MGI Expression: Detected	TS25_hypothalamus	8.85948e-06	0.000921839	1.54861	61.9909	96	487	10	14	17	ARNT,ARNT2,ATP10A,EMX2,SLITRK1,SLITRK2,SLITRK3,SLITRK4,SLITRK5,SRD5A1	ARNT,ARNT2,ATP10A,CYP19A1,EMX2,ESR2,GPRIN1,SLITRK1,SLITRK2,SLITRK3,SLITRK4,SLITRK5,SRD5A1,TUB
MGI Expression: Detected	TS28_lower jaw molar	5.69725e-05	0.0040516	2.85672	5.60082	16	44	4	5	6	ARNT,GTF2I,GTF2IRD1,MMP20	ARNT,DLX3,GTF2I,GTF2IRD1,MMP20
MSigDB Pathway	Genes involved in Downstream events in GPCR signaling	3.06872e-15	1.0557e-11	1.34975	466.014	629	3661	199	318	450	ADCY2,ADCY5,ADCY6,ADCY7,ADCY8,ADCY9,ADCYAP1,ADCYAP1R1,ADM,ADORA2A,ADORA3,ADRA1A,ADRA1B,ADRA1D,ADRA2A,ADRA2C,ADRB1,ADRB2,ADRBK1,AGTR1,AKT2,AKT3,ANXA1,APLNR,ARHGEF11,ARHGEF12,ARHGEF17,ARHGEF18,ARHGEF2,ARHGEF3,ARHGEF6,ARHGEF7,AVPR1A,BDKRB1,CALCA,CALCR,CALCRL,CCKAR,CCL19,CCL21,CCL25,CCR4,CCR5,CHRM1,CHRM2,CHRM3,CHRM5,CRH,CRHR1,CRHR2,CXCL12,CXCR7,DAGLA,DGKB,DGKD,DGKG,DGKH,DGKI,DNAJC25,DRD1,DRD2,ECT2,ED…	ADCY2,ADCY3,ADCY5,ADCY6,ADCY7,ADCY8,ADCY9,ADCYAP1,ADCYAP1R1,ADM,ADORA1,ADORA2A,ADORA2B,ADORA3,ADRA1A,ADRA1B,ADRA1D,ADRA2A,ADRA2B,ADRA2C,ADRB1,ADRB2,ADRBK1,AGT,AGTR1,AKAP13,AKT2,AKT3,ANXA1,APLN,APLNR,ARHGAP4,ARHGEF11,ARHGEF12,ARHGEF16,ARHGEF17,ARHGEF18,ARHGEF2,ARHGEF3,ARHGEF6,ARHGEF7,AVP,AVPR1A,AVPR2,BDKRB1,C3AR1,C5,CALCA,CALCB,CALCR,CALCRL,CASR,CCK,CCKAR,CCKBR,CCL19,CCL20,CCL21,CCL25,CCL27,CCL28,…
MSigDB Pathway	Genes involved in Olfactory Signaling Pathway	2.18138e-12	2.61021e-09	2.73926	19.3483	53	152	28	55	348	GNAL,GNB1,OR10G2,OR10J1,OR1D4,OR2C1,OR2K2,OR2S2,OR4E2,OR51E2,OR51F1,OR51F2,OR51T1,OR52D1,OR52I2,OR52K1,OR52K2,OR52R1,OR56B4,OR6S1,OR7C2,OR8B12,OR8B4,OR8B8,OR8S1,OR9A2,OR9I1,OR9Q2	GNAL,GNB1,OR10A7,OR10G2,OR10G3,OR10G7,OR10J1,OR10J3,OR1D4,OR1Q1,OR1S2,OR2AT4,OR2C1,OR2K2,OR2S2,OR4B1,OR4D11,OR4E2,OR51D1,OR51E2,OR51F1,OR51F2,OR51I2,OR51L1,OR51M1,OR51Q1,OR51S1,OR51T1,OR51V1,OR52B2,OR52D1,OR52E2,OR52E4,OR52H1,OR52I2,OR52K1,OR52K2,OR52R1,OR52W1,OR56A1,OR56B4,OR5AK2,OR6K3,OR6S1,OR7C2,OR8B12,OR8B4,OR8B8,OR8D4,OR8S1,OR9A2,OR9A4,OR9I1,OR9Q1,OR9Q2
MSigDB Pathway	Type I diabetes mellitus	5.69802e-12	6.03147e-09	2.29931	31.3137	72	246	15	21	38	CD28,CPE,FASLG,GAD1,GAD2,GZMB,HLA-DMA,HLA-DMB,HLA-DOA,ICA1,IL12A,IL12B,IL2,PRF1,PTPRN2	CD28,CD86,CPE,FASLG,GAD1,GAD2,GZMB,HLA-DMA,HLA-DMB,HLA-DOA,ICA1,IFNG,IL12A,IL12B,IL1A,IL1B,IL2,INS-IGF2,LTA,PRF1,PTPRN2
MSigDB Pathway	Calcium signaling pathway	4.33241e-11	3.31207e-08	1.38679	268.967	373	2113	98	145	180	ADCY2,ADCY7,ADCY8,ADCY9,ADORA2A,ADRA1A,ADRA1B,ADRA1D,ADRB1,ADRB2,AGTR1,ATP2A1,ATP2B1,ATP2B2,ATP2B3,AVPR1A,BDKRB1,BST1,CACNA1A,CACNA1B,CACNA1C,CACNA1D,CACNA1E,CACNA1G,CACNA1I,CALM1,CALM2,CALML3,CAMK2G,CAMK4,CCKAR,CD38,CHRM1,CHRM2,CHRM3,CHRM5,CHRNA7,DRD1,EDNRB,EGFR,ERBB2,ERBB4,GNA14,GNAL,GNAS,GRIN2A,GRIN2C,GRM1,GRM5,HRH1,HRH2,HTR2A,HTR2B,HTR2C,HTR4,HTR5A,HTR7,ITPKB,ITPR1,LHCGR,MYLK2,MYLK3,NOS1,NOS2…	ADCY2,ADCY3,ADCY7,ADCY8,ADCY9,ADORA2A,ADORA2B,ADRA1A,ADRA1B,ADRA1D,ADRB1,ADRB2,AGTR1,ATP2A1,ATP2A2,ATP2A3,ATP2B1,ATP2B2,ATP2B3,ATP2B4,AVPR1A,BDKRB1,BST1,CACNA1A,CACNA1B,CACNA1C,CACNA1D,CACNA1E,CACNA1G,CACNA1I,CALM1,CALM2,CALM3,CALML3,CAMK2A,CAMK2D,CAMK2G,CAMK4,CCKAR,CCKBR,CD38,CHP2,CHRM1,CHRM2,CHRM3,CHRM5,CHRNA7,CYSLTR2,DRD1,DRD5,EDNRA,EDNRB,EGFR,ERBB2,ERBB3,ERBB4,F2R,GNA14,GNAL,GNAQ,GNAS,GNAS,GR…
MSigDB Pathway	Olfactory transduction	1.16188e-10	8.19917e-08	1.94354	48.8799	95	384	45	84	390	ADRBK2,CALM1,CALM2,CALML3,CAMK2G,CNGA3,CNGB1,GNAL,GUCA1C,GUCY2D,OR10G2,OR10J1,OR11H4,OR13C9,OR13H1,OR1D4,OR2C1,OR2K2,OR2S2,OR4E2,OR51E2,OR51F1,OR51F2,OR51T1,OR52D1,OR52I2,OR52K1,OR52K2,OR52R1,OR56B4,OR6S1,OR7C2,OR8B12,OR8B4,OR8B8,OR8S1,OR9A2,OR9I1,OR9Q2,PDC,PDE1C,PRKACA,PRKACG,PRKG1,PRKX	ADCY3,ADRBK2,ARRB2,CALM1,CALM2,CALM3,CALML3,CAMK2A,CAMK2D,CAMK2G,CNGA3,CNGB1,GNAL,GUCA1C,GUCY2D,OR10A7,OR10G2,OR10G3,OR10G7,OR10J1,OR10J3,OR11H4,OR11H6,OR13C5,OR13C8,OR13C9,OR13D1,OR13F1,OR13H1,OR1D4,OR1Q1,OR1S2,OR2AT4,OR2C1,OR2K2,OR2S2,OR4B1,OR4D11,OR4E2,OR51D1,OR51E2,OR51F1,OR51F2,OR51I2,OR51L1,OR51M1,OR51Q1,OR51S1,OR51T1,OR51V1,OR52B2,OR52D1,OR52E2,OR52E4,OR52H1,OR52I2,OR52K1,OR52K2,OR52R1,OR5…
MSigDB Pathway	Lysine degradation	5.13924e-10	2.82879e-07	2.03577	38.3147	78	301	26	35	44	AADAT,AASDH,AASDHPPT,ALDH1B1,ALDH3A2,ALDH7A1,ASH1L,BBOX1,EHHADH,EHMT1,EHMT2,HADHA,NSD1,OGDHL,PLOD2,PLOD3,SETD2,SETD7,SETD8,SETDB2,SETMAR,SUV39H1,SUV39H2,SUV420H1,WHSC1,WHSC1L1	AADAT,AASDH,AASDHPPT,AASS,ALDH1B1,ALDH3A2,ALDH7A1,ASH1L,BBOX1,DLST,EHHADH,EHMT1,EHMT2,HADH,HADHA,NSD1,OGDHL,PIPOX,PLOD1,PLOD2,PLOD3,SETD1A,SETD1B,SETD2,SETD7,SETD8,SETDB1,SETDB2,SETMAR,SUV39H1,SUV39H2,SUV420H1,SUV420H2,WHSC1,WHSC1L1
MSigDB Pathway	Genes involved in Abortive elongation of HIV-1 transcript in the absence of Tat	2.45087e-09	1.05393e-06	3.928	5.60082	22	44	12	15	24	CTDP1,GTF2F2,NCBP1,NCBP2,POLR2A,POLR2B,POLR2C,POLR2D,POLR2I,SUPT5H,TH1L,WHSC2	CTDP1,GTF2F1,GTF2F2,NCBP1,NCBP2,POLR2A,POLR2B,POLR2C,POLR2D,POLR2F,POLR2I,SUPT4H1,SUPT5H,TH1L,WHSC2
MSigDB Pathway	Neuroactive ligand-receptor interaction	1.48229e-08	4.58369e-06	1.25686	428.845	539	3369	135	201	276	ADCYAP1R1,ADORA2A,ADORA3,ADRA1A,ADRA1B,ADRA1D,ADRA2A,ADRA2C,ADRB1,ADRB2,AGTR1,APLNR,AVPR1A,BDKRB1,CALCR,CALCRL,CCKAR,CHRM1,CHRM2,CHRM3,CHRM5,CHRNA1,CHRNA10,CHRNA4,CHRNA7,CHRNB2,CHRNB3,CRHR1,CRHR2,DRD1,DRD2,EDNRB,F2,F2RL2,FSHB,FSHR,GABBR2,GABRA1,GABRA2,GABRA3,GABRA5,GABRA6,GABRB2,GABRB3,GABRG1,GABRG2,GABRG3,GABRP,GABRQ,GABRR1,GALR1,GHR,GLP1R,GLRA1,GLRA3,GNRHR,GPR156,GPR35,GPR50,GPR83,GRIA1,GRIA2,G…	ADCYAP1R1,ADORA1,ADORA2A,ADORA2B,ADORA3,ADRA1A,ADRA1B,ADRA1D,ADRA2A,ADRA2B,ADRA2C,ADRB1,ADRB2,AGTR1,APLNR,AVPR1A,AVPR2,BDKRB1,BRS3,C3AR1,CALCR,CALCRL,CCKAR,CCKBR,CGA,CHRM1,CHRM2,CHRM3,CHRM4,CHRM5,CHRNA1,CHRNA10,CHRNA2,CHRNA4,CHRNA5,CHRNA6,CHRNA7,CHRNA9,CHRNB2,CHRNB3,CHRNB4,CHRND,CHRNG,CNR1,CRHR1,CRHR2,CYSLTR2,DRD1,DRD2,DRD3,DRD5,EDNRA,EDNRB,F2,F2R,F2RL2,FSHB,FSHR,GABBR1,GABBR2,GABRA1,GABRA2,GABRA…
MSigDB Pathway	Genes involved in mTOR signalling	1.56183e-08	4.74961e-06	2.5532	15.275	39	120	12	21	27	AKT2,CAB39,EIF4E,EIF4EBP1,PRKAA2,PRKAB1,PRKAG1,PRKAG2,PRKAG3,RHEB,RPTOR,TSC1	AKT2,CAB39,CAB39L,EEF2K,EIF4B,EIF4E,EIF4EBP1,EIF4G1,MTOR,PPM1A,PRKAA2,PRKAB1,PRKAB2,PRKAG1,PRKAG2,PRKAG3,RHEB,RPS6,RPS6KB1,RPTOR,TSC1
MSigDB Pathway	Genes involved in RNA Polymerase II Transcription	3.97875e-08	1.02818e-05	1.94966	34.8778	68	274	32	54	95	CCNH,CDC40,CSTF2,CTDP1,ERCC3,GTF2A1,GTF2B,GTF2E1,GTF2E2,GTF2F2,NCBP1,NCBP2,PAPOLA,POLR2A,POLR2B,POLR2C,POLR2D,POLR2I,RNGTT,RNMT,SFRS1,SFRS4,SFRS5,SFRS6,SRRM1,SUPT16H,SUPT5H,TAF4,TAF4B,TAF5,TH1L,WHSC2	CCNH,CCNT2,CDC40,CSTF2,CSTF3,CTDP1,ELL,ERCC3,GTF2A1,GTF2B,GTF2E1,GTF2E2,GTF2F1,GTF2F2,GTF2H1,GTF2H2B,MAGOH,MNAT1,NCBP1,NCBP2,PABPN1,PAPOLA,PCF11,POLR2A,POLR2B,POLR2C,POLR2D,POLR2F,POLR2I,RBM8A,RNGTT,RNMT,RNPS1,SFRS1,SFRS3,SFRS4,SFRS5,SFRS6,SFRS7,SFRS9,SRRM1,SUPT16H,SUPT4H1,SUPT5H,TAF12,TAF13,TAF4,TAF4B,TAF5,TCEB3,TH1L,U2AF2,UPF3B,WHSC2
MSigDB Pathway	Basal transcription factors	5.17794e-08	1.2955e-05	2.48773	15.275	38	120	14	23	36	GTF2A1,GTF2B,GTF2E1,GTF2E2,GTF2F2,GTF2I,GTF2IRD1,STON1-GTF2A1L,TAF1L,TAF4,TAF4B,TAF5,TAF7,TBPL2	GTF2A1,GTF2B,GTF2E1,GTF2E2,GTF2F1,GTF2F2,GTF2H1,GTF2H2B,GTF2I,GTF2IRD1,STON1-GTF2A1L,TAF12,TAF13,TAF1L,TAF2,TAF4,TAF4B,TAF5,TAF5L,TAF7,TAF7L,TBPL1,TBPL2
MSigDB Pathway	Vibrio cholerae infection	9.39057e-08	2.18095e-05	1.75464	50.1528	88	394	26	44	55	ADCY9,ATP6V0A2,ATP6V0C,ATP6V0D2,ATP6V0E1,ATP6V0E2,ATP6V1A,ATP6V1C1,ATP6V1E1,ATP6V1G3,ATP6V1H,GNAS,KCNQ1,KDELR2,PLCG1,PRKACA,PRKACG,PRKCA,PRKCB,PRKX,SEC61A2,SEC61B,SEC61G,SLC12A2,TJP1,TJP2	ACTB,ACTG1,ADCY3,ADCY9,ATP6V0A1,ATP6V0A2,ATP6V0C,ATP6V0D1,ATP6V0D2,ATP6V0E1,ATP6V0E2,ATP6V1A,ATP6V1B1,ATP6V1B2,ATP6V1C1,ATP6V1D,ATP6V1E1,ATP6V1F,ATP6V1G3,ATP6V1H,CFTR,ERO1L,GNAS,GNAS,KCNQ1,KDELR1,KDELR2,KDELR3,PDIA4,PLCG1,PLCG2,PRKACA,PRKACB,PRKACG,PRKCA,PRKCB,PRKX,SEC61A1,SEC61A2,SEC61B,SEC61G,SLC12A2,TJP1,TJP2
MSigDB Pathway	Genes involved in Cholesterol biosynthesis	1.16925e-07	2.6269e-05	2.74046	10.9471	30	86	11	13	21	DHCR24,DHCR7,HMGCR,HMGCS1,HSD17B7,IDI1,LBR,PMVK,SC4MOL,SC5DL,SQLE	CYP51A1,DHCR24,DHCR7,HMGCR,HMGCS1,HSD17B7,IDI1,LBR,MVK,PMVK,SC4MOL,SC5DL,SQLE
MSigDB Pathway	Genes involved in Metabolism of RNA	1.68875e-07	3.53438e-05	1.8057	42.6426	77	335	39	62	96	C2orf29,CLNS1A,CNOT1,CNOT2,CNOT4,CNOT6,CNOT6L,CNOT7,DCP1B,DDX20,DIS3,EDC3,EIF4E,EXOSC2,EXOSC7,EXOSC9,GEMIN6,GEMIN7,LSM5,LSM6,NCBP1,NCBP2,NUP133,NUP155,NUP210,NUP214,NUP35,NUP50,NUP85,NUP88,NUP93,PAN3,PARN,RANBP2,RQCD1,SEH1L,SNUPN,TGS1,XRN1	AAAS,C2orf29,CLNS1A,CNOT1,CNOT2,CNOT4,CNOT6,CNOT6L,CNOT7,DCP1A,DCP1B,DCP2,DCPS,DDX20,DIS3,EDC3,EIF4A1,EIF4B,EIF4E,EIF4G1,EXOSC2,EXOSC7,EXOSC9,GEMIN6,GEMIN7,LSM3,LSM4,LSM5,LSM6,NCBP1,NCBP2,NUP107,NUP133,NUP153,NUP155,NUP160,NUP205,NUP210,NUP214,NUP35,NUP37,NUP50,NUP54,NUP85,NUP88,NUP93,NUPL2,PABPC1,PAN3,PARN,PRMT5,RANBP2,RQCD1,SEH1L,SIP1,SNRPD1,SNRPE,SNRPF,SNUPN,TGS1,TNKS1BP1,XRN1
MSigDB Pathway	Genes involved in Opioid Signalling	2.0704e-07	4.26821e-05	1.46865	115.071	169	904	45	65	83	ADCY2,ADCY5,ADCY6,ADCY7,ADCY8,ADCY9,ADRBK1,CALM1,CALM2,CAMK4,CDKL3,CREB1,DNAJC25,GNA14,GNAI1,GNAI2,GNAI3,GNAL,GNAO1,GNB1,GNB3,GNB4,GNG12,GNG2,GNG4,GNG8,ITPR1,OPRM1,PDE1B,PDE1C,PDE4A,PDE4B,PDE4D,PDYN,PLA2G4A,PLCB4,POMC,PPP2R1B,PPP3CA,PPP3CB,PPP3CC,PRKACA,PRKACG,PRKAR1A,PRKAR2A	ADCY2,ADCY3,ADCY5,ADCY6,ADCY7,ADCY8,ADCY9,ADRBK1,CALM1,CALM2,CALM3,CAMK4,CDKL3,CREB1,DNAJC25,GNA14,GNAI1,GNAI2,GNAI3,GNAL,GNAO1,GNAQ,GNAT1,GNAT2,GNAT3,GNAZ,GNB1,GNB2,GNB3,GNB4,GNG12,GNG2,GNG4,GNG8,ITPR1,ITPR3,OPRM1,PDE1A,PDE1B,PDE1C,PDE4A,PDE4B,PDE4C,PDE4D,PDYN,PLA2G4A,PLCB1,PLCB2,PLCB3,PLCB4,POMC,PPP1R1B,PPP2CB,PPP2R1B,PPP2R5D,PPP3CA,PPP3CB,PPP3CC,PPP3R1,PRKACA,PRKACB,PRKACG,PRKAR1A,PRKAR2A,PRKA…
MSigDB Pathway	Genes involved in Apoptotic execution phase	3.93316e-07	7.49111e-05	1.8421	36.9145	68	290	22	38	48	ADD1,APC,BMX,CASP3,CASP6,CTNNB1,DFFB,DSP,FNTA,H1F0,HIST1H1C,KPNA1,KPNB1,LMNA,LMNB1,MAPT,PRKCQ,PTK2,ROCK1,SPTAN1,TJP1,TJP2	ACIN1,ADD1,APC,BMX,CASP3,CASP6,CASP7,CDH1,CLSPN,CTNNB1,DFFB,DSG1,DSG3,DSP,FNTA,GAS2,GSN,H1F0,HIST1H1C,HIST1H1D,HIST1H1E,KPNA1,KPNB1,LMNA,LMNB1,MAPT,MST4,OCLN,PAK2,PKP1,PRKCQ,PTK2,ROCK1,SPTAN1,STK24,TJP1,TJP2,VIM
MSigDB Pathway	Chemokine signaling pathway	2.08662e-06	0.000285706	1.36484	153.131	209	1203	77	119	190	ADCY2,ADCY5,ADCY6,ADCY7,ADCY8,ADCY9,ADRBK1,ADRBK2,AKT2,AKT3,BCAR1,BRAF,CCL1,CCL19,CCL21,CCL22,CCL25,CCR4,CCR5,CSK,CX3CR1,CXCL12,CXCL14,DNAJC25,DOCK2,ELMO1,GNAI1,GNAI2,GNAI3,GNB1,GNB3,GNB4,GNG12,GNG2,GNG4,GNG8,GRB2,GRK7,GSK3A,ITK,JAK2,LYN,MAPK1,NCF1,NFKB1,NFKBIA,PAK1,PARD3,PIK3CB,PIK3CD,PIK3CG,PIK3R1,PIK3R3,PLCB4,PREX1,PRKACA,PRKACG,PRKCB,PRKX,PTK2,RAF1,RAP1B,RASGRP2,ROCK1,ROCK2,SHC1,SHC4,SOS1,SOS…	ADCY2,ADCY3,ADCY5,ADCY6,ADCY7,ADCY8,ADCY9,ADRBK1,ADRBK2,AKT2,AKT3,ARRB1,ARRB2,BCAR1,BRAF,CCL1,CCL17,CCL19,CCL20,CCL21,CCL22,CCL25,CCL27,CCL28,CCR4,CCR5,CCR7,CCR8,CCR9,CDC42,CRKL,CSK,CX3CR1,CXCL12,CXCL13,CXCL14,CXCR3,CXCR4,CXCR5,DNAJC25,DOCK2,ELMO1,FOXO3,GNAI1,GNAI2,GNAI3,GNB1,GNB2,GNB3,GNB4,GNG12,GNG2,GNG4,GNG8,GRB2,GRK5,GRK6,GRK7,GSK3A,GSK3B,IKBKB,IL8RA,ITK,JAK2,LYN,MAP2K1,MAPK1,MAPK3,NCF1,NFKB1…
MSigDB Pathway	Genes involved in Late Phase of HIV Life Cycle	2.68812e-06	0.000356535	1.74297	39.5876	69	311	38	57	93	CCNH,CTDP1,ERCC3,GTF2A1,GTF2B,GTF2E1,GTF2E2,GTF2F2,NCBP1,NCBP2,NUP133,NUP155,NUP210,NUP214,NUP35,NUP50,NUP85,NUP88,NUP93,POLR2A,POLR2B,POLR2C,POLR2D,POLR2I,RAN,RANBP1,RANBP2,RNGTT,RNMT,SEH1L,SUPT16H,SUPT5H,TAF4,TAF4B,TAF5,TH1L,WHSC2,XPO1	AAAS,CCNH,CTDP1,ELL,ERCC3,GTF2A1,GTF2B,GTF2E1,GTF2E2,GTF2F1,GTF2F2,GTF2H1,GTF2H2B,MNAT1,NCBP1,NCBP2,NUP107,NUP133,NUP153,NUP155,NUP160,NUP205,NUP210,NUP214,NUP35,NUP37,NUP50,NUP54,NUP85,NUP88,NUP93,NUPL2,POLR2A,POLR2B,POLR2C,POLR2D,POLR2F,POLR2I,RAN,RANBP1,RANBP2,RANGAP1,RNGTT,RNMT,SEH1L,SUPT16H,SUPT4H1,SUPT5H,TAF12,TAF13,TAF4,TAF4B,TAF5,TCEB3,TH1L,WHSC2,XPO1
MSigDB Pathway	Genes involved in Class A/1 (Rhodopsin-like receptors)	8.21356e-06	0.000864434	1.25945	257.256	324	2021	112	186	294	ADORA2A,ADORA3,ADRA1A,ADRA1B,ADRA1D,ADRA2A,ADRA2C,ADRB1,ADRB2,AGTR1,ANXA1,APLNR,AVPR1A,BDKRB1,CCKAR,CCL19,CCL21,CCL22,CCL25,CCR4,CCR5,CHRM1,CHRM2,CHRM3,CHRM5,CX3CR1,CXCL12,CXCR7,DARC,DRD1,DRD2,EDN1,EDN2,EDN3,EDNRB,F2,F2RL2,FSHB,FSHR,GAL,GALR1,GNRHR,GRP,HCRTR2,HRH1,HRH2,HRH3,HRH4,HTR1B,HTR1F,HTR2A,HTR2B,HTR2C,HTR4,HTR5A,HTR7,INSL5,LHCGR,LPAR2,LPAR6,MC3R,MC4R,MC5R,MLN,MTNR1B,NIACR1,NIACR2,NPFF,NPS,…	ADORA1,ADORA2A,ADORA2B,ADORA3,ADRA1A,ADRA1B,ADRA1D,ADRA2A,ADRA2B,ADRA2C,ADRB1,ADRB2,AGT,AGTR1,ANXA1,APLN,APLNR,AVP,AVPR1A,AVPR2,BDKRB1,C3AR1,C5,CCK,CCKAR,CCKBR,CCL17,CCL19,CCL20,CCL21,CCL22,CCL25,CCL27,CCL28,CCR4,CCR5,CCR7,CCR8,CCR9,CCRL1,CGA,CHRM1,CHRM2,CHRM3,CHRM4,CHRM5,CNR1,CX3CR1,CXCL12,CXCL13,CXCR3,CXCR4,CXCR5,CXCR7,CYSLTR2,DARC,DRD1,DRD2,DRD3,DRD5,EDN1,EDN2,EDN3,EDNRA,EDNRB,F2,F2R,F2RL2,FFA…
MSigDB Pathway	RNA degradation	8.42857e-06	0.000883683	1.66853	43.1518	72	339	24	36	56	C1D,CNOT1,CNOT2,CNOT4,CNOT6,CNOT6L,CNOT7,DCP1B,DIS3,EDC3,ENO2,EXOSC2,EXOSC7,EXOSC9,HSPA9,LSM5,LSM6,MPHOSPH6,PAPOLA,PARN,POLS,RQCD1,XRN1,XRN2	C1D,CNOT1,CNOT2,CNOT4,CNOT6,CNOT6L,CNOT7,DCP1A,DCP1B,DCP2,DCPS,DIS3,EDC3,ENO2,EXOSC10,EXOSC2,EXOSC7,EXOSC9,HSPA9,LSM3,LSM4,LSM5,LSM6,LSM8,MPHOSPH6,PAPOLA,PAPOLG,PARN,PATL1,PNPT1,POLS,RQCD1,TTC37,XRN1,XRN2,ZCCHC7
MSigDB Pathway	Genes involved in PD-1 signaling	8.8329e-06	0.000920813	2.54789	9.41956	24	74	12	14	32	CD247,CD274,CD4,CSK,HLA-DMA,HLA-DMB,HLA-DOA,PDCD1LG2,PTPN11,TCRB,TRA,TRA@	CD247,CD274,CD4,CSK,HLA-DMA,HLA-DMB,HLA-DOA,LCK,PDCD1LG2,PTPN11,PTPN6,TCRB,TRA,TRA@
MSigDB Pathway	Purine metabolism	1.38246e-05	0.0013188	1.32168	161.915	214	1272	69	106	157	ADA,ADCY2,ADCY5,ADCY6,ADCY7,ADCY8,ADCY9,ADK,ADSL,ADSS,AK2,AK3L1,AK5,ALLC,CANT1,DCK,DGUOK,ENTPD1,ENTPD3,ENTPD6,FHIT,GDA,GMPR,GMPS,GUCY1A2,GUCY1A3,GUCY2D,IMPDH1,NME6,NP,NT5C1B,NT5C3,NT5E,NUDT5,PAICS,PAPSS2,PDE10A,PDE1B,PDE1C,PDE3A,PDE3B,PDE4A,PDE4B,PDE4D,PDE5A,PDE6D,PDE7A,PDE7B,PDE8B,PDE9A,PFAS,POLA2,POLD4,POLE4,POLR1B,POLR1D,POLR2A,POLR2B,POLR2C,POLR2D,POLR2I,POLR2J2,POLR3B,PPAT,PRIM2,PRPS1L1,PRPS…	ADA,ADCY2,ADCY3,ADCY5,ADCY6,ADCY7,ADCY8,ADCY9,ADK,ADSL,ADSS,AK2,AK3L1,AK5,AK7,ALLC,AMPD1,AMPD2,AMPD3,ATIC,CANT1,DCK,DGUOK,ENPP1,ENTPD1,ENTPD3,ENTPD5,ENTPD6,FHIT,GDA,GMPR,GMPS,GUCY1A2,GUCY1A3,GUCY1B3,GUCY2D,GUCY2F,HPRT1,IMPDH1,IMPDH2,NME1-NME2,NME5,NME6,NP,NPR1,NPR2,NT5C1B,NT5C2,NT5C3,NT5E,NUDT2,NUDT5,PAICS,PAPSS1,PAPSS2,PDE10A,PDE11A,PDE1A,PDE1B,PDE1C,PDE2A,PDE3A,PDE3B,PDE4A,PDE4B,PDE4C,PDE4D,PDE…
MSigDB Pathway	Genes involved in Integration of energy metabolism	1.95525e-05	0.0017083	1.30933	168.025	220	1320	80	126	220	ACLY,ADCY2,ADCY5,ADCY6,ADCY7,ADCY8,ADCY9,ALDOB,ATP5H,ATP5J,CAB39,CACNA1A,CACNA1C,CACNA1D,CACNA1E,CACNA2D2,CACNB2,CACNB3,CDKL3,COX5A,COX6C,COX7A2L,COX7C,CYCS,DNAJC25,ENO2,GCG,GNAI1,GNAI2,GNAO1,GNAS,GNB1,GNB3,GNB4,GNG12,GNG2,GNG4,GNG8,GPI,IDH3A,NDUFA10,NDUFA4,NDUFA5,NDUFA9,NDUFB2,NDUFB4,NDUFB6,NDUFB9,NDUFS2,NDUFS5,NDUFV2,PDHA1,PDHX,PDK1,PDK3,PFKFB1,PFKFB3,PFKP,PPP2R1B,PRKAA2,PRKAB1,PRKACA,PRKACG,PR…	ABCC8,ACLY,ACO2,ACSL1,ADCY2,ADCY3,ADCY5,ADCY6,ADCY7,ADCY8,ADCY9,AGPAT1,ALDOA,ALDOB,ATP5G1,ATP5H,ATP5J,ATP5L,CAB39,CAB39L,CACNA1A,CACNA1C,CACNA1D,CACNA1E,CACNA2D2,CACNB2,CACNB3,CDKL3,COX4I1,COX5A,COX6C,COX7A2L,COX7C,CPT1B,CYCS,DLD,DLST,DNAJC25,DONSON,ENO2,ETFA,FH,GCG,GCGR,GNAI1,GNAI2,GNAO1,GNAS,GNAS,GNB1,GNB2,GNB3,GNB4,GNG12,GNG2,GNG4,GNG8,GPI,IDH2,IDH3A,INS-IGF2,MLXIPL,NDUFA10,NDUFA12,NDUFA4,NDUF…
MSigDB Pathway	Genes involved in Mitotic Prometaphase	2.0918e-05	0.00182182	1.40979	97.8871	138	769	47	65	92	AHCTF1,BUB1,BUB3,CDKL3,CENPC1,CENPE,CENPI,CENPN,CENPT,CKAP5,CLASP1,CLASP2,CLIP1,CORT,DSN1,INCENP,ITGB3BP,KIF18A,KIF2A,KIF2B,KNTC1,MAD2L1,MLF1IP,NDC80,NDEL1,NUDC,NUF2,NUP133,NUP85,PAFAH1B1,PMF1,PPP1CC,PPP2R1B,PPP2R5A,PPP2R5C,RAD21,RANBP2,RCC2,SEC13,SEH1L,SGOL1,SKA1,SPC25,STAG2,TAOK1,XPO1,ZWINT	AHCTF1,BUB1,BUB3,CCDC99,CDCA8,CDKL3,CENPC1,CENPE,CENPI,CENPM,CENPN,CENPT,CKAP5,CLASP1,CLASP2,CLIP1,CORT,DSN1,ERCC6L,INCENP,ITGB3BP,KIF18A,KIF2A,KIF2B,KNTC1,MAD2L1,MLF1IP,NDC80,NDE1,NDEL1,NUDC,NUF2,NUP107,NUP133,NUP160,NUP37,NUP85,PAFAH1B1,PLK1,PMF1,PPP1CC,PPP2CB,PPP2R1B,PPP2R5A,PPP2R5C,PPP2R5D,RAD21,RANBP2,RANGAP1,RCC2,SEC13,SEH1L,SGOL1,SKA1,SKA2,SMC1A,SMC3,SPC24,SPC25,STAG1,STAG2,TAOK1,XPO1,ZW10…
MSigDB Pathway	Cytosolic DNA-sensing pathway	2.46953e-05	0.00208802	2.28077	11.8381	27	93	10	18	55	ADAR,AIM2,DDX58,IL33,IRF3,NFKB1,NFKBIA,POLR1D,POLR3B,TBK1	ADAR,AIM2,DDX58,IKBKB,IKBKE,IL1B,IL33,IL6,IRF3,NFKB1,NFKBIA,POLR1D,POLR3A,POLR3B,POLR3F,RELA,TBK1,ZBP1
MSigDB Pathway	Butanoate metabolism	3.30078e-05	0.00264077	1.72832	31.8228	55	250	19	21	34	AACS,ABAT,ACADS,ACSM4,ALDH1B1,ALDH3A2,ALDH5A1,ALDH7A1,BDH1,BDH2,EHHADH,GAD1,GAD2,HADHA,HMGCS1,HMGCS2,OXCT1,PDHA1,PDHA2	AACS,ABAT,ACADS,ACSM4,ALDH1B1,ALDH3A2,ALDH5A1,ALDH7A1,BDH1,BDH2,EHHADH,GAD1,GAD2,HADH,HADHA,HMGCS1,HMGCS2,OXCT1,PDHA1,PDHA2,PDHB
MSigDB Pathway	Genes involved in Mitotic M-M/G1 phases	4.27282e-05	0.00323506	1.32747	137.857	183	1083	71	103	158	AHCTF1,BUB1,BUB3,CDKL3,CENPC1,CENPE,CENPI,CENPN,CENPT,CKAP5,CLASP1,CLASP2,CLIP1,CORT,DSN1,E2F2,E2F3,GORASP1,INCENP,ITGB3BP,KIF18A,KIF2A,KIF2B,KNTC1,MAD2L1,MLF1IP,NDC80,NDEL1,NUDC,NUF2,NUP133,NUP85,ORC1L,ORC3L,ORC4L,ORC5L,PAFAH1B1,PMF1,PPP1CC,PPP2R1B,PPP2R5A,PPP2R5C,PSMA1,PSMA4,PSMA5,PSMA6,PSMB2,PSMB7,PSMB9,PSMC4,PSMD1,PSMD12,PSMD14,PSMD5,PSMD6,PSMD7,PSMD9,PSMF1,RAD21,RANBP2,RCC2,SEC13,SEH1L,SGOL1…	AHCTF1,BUB1,BUB3,CCDC99,CDC6,CDCA8,CDKL3,CENPC1,CENPE,CENPI,CENPM,CENPN,CENPT,CKAP5,CLASP1,CLASP2,CLIP1,CORT,DSN1,E2F1,E2F2,E2F3,ERCC6L,FBXO5,GMNN,GORASP1,INCENP,ITGB3BP,KIF18A,KIF2A,KIF2B,KNTC1,MAD2L1,MCM5,MLF1IP,NDC80,NDE1,NDEL1,NUDC,NUF2,NUP107,NUP133,NUP160,NUP37,NUP85,ORC1L,ORC2L,ORC3L,ORC4L,ORC5L,ORC6L,PAFAH1B1,PLK1,PMF1,PPP1CC,PPP2CB,PPP2R1B,PPP2R5A,PPP2R5C,PPP2R5D,PSMA1,PSMA4,PSMA5,PSMA6,…
MSigDB Pathway	Ubiquitin mediated proteolysis	4.45488e-05	0.00334073	1.28919	173.753	224	1365	64	97	134	ANAPC1,ANAPC4,ANAPC7,BIRC6,CBLB,CDC27,CUL1,CUL3,CUL4B,DDB1,FANCL,FBXW11,FBXW7,FBXW8,HERC2,HERC4,HUWE1,ITCH,KLHL13,MAP3K1,MDM2,MID1,NEDD4,NEDD4L,PARK2,PIAS1,PPIL2,PRPF19,RBX1,RHOBTB2,RNF7,SIAH1,SKP1,SKP2,SMURF1,SOCS1,SYVN1,TRIM32,TRIM37,TRIP12,UBA2,UBA6,UBE2B,UBE2E1,UBE2E2,UBE2E3,UBE2F,UBE2H,UBE2J1,UBE2K,UBE2L3,UBE2M,UBE2NL,UBE2O,UBE2Q1,UBE2QL1,UBE2R2,UBE2S,UBE2U,UBE3A,UBE3C,UBE4B,UBR5,WWP1	ANAPC1,ANAPC13,ANAPC4,ANAPC5,ANAPC7,BIRC3,BIRC6,BRCA1,BTRC,CBL,CBLB,CDC23,CDC27,CUL1,CUL3,CUL4B,DDB1,DET1,FANCL,FBXO2,FBXO4,FBXW11,FBXW7,FBXW8,HERC1,HERC2,HERC3,HERC4,HUWE1,ITCH,KEAP1,KLHL13,MAP3K1,MDM2,MID1,NEDD4,NEDD4L,PARK2,PIAS1,PIAS2,PPIL2,PRPF19,RBX1,RCHY1,RFWD2,RHOBTB2,RNF7,SAE1,SIAH1,SKP1,SKP2,SMURF1,SMURF2,SOCS1,SOCS3,SYVN1,TRAF6,TRIM32,TRIM37,TRIP12,UBA1,UBA2,UBA6,UBA7,UBE2A,UBE2B,UBE2D…
MSigDB Pathway	Valine, leucine and isoleucine degradation	5.79496e-05	0.0040999	1.64679	37.0418	61	291	19	26	44	ABAT,ACADS,ACADSB,ALDH1B1,ALDH3A2,ALDH7A1,AUH,BCKDHB,DBT,EHHADH,HADHA,HIBADH,HMGCS1,HMGCS2,HSD17B10,MCCC1,MUT,OXCT1,PCCA	ABAT,ACAA2,ACADM,ACADS,ACADSB,ALDH1B1,ALDH3A2,ALDH6A1,ALDH7A1,AUH,BCKDHB,DBT,DLD,EHHADH,HADH,HADHA,HIBADH,HMGCS1,HMGCS2,HSD17B10,MCCC1,MCCC2,MUT,OXCT1,PCCA,PCCB
MSigDB Pathway	Genes involved in Inhibition of Insulin Secretion by Adrenaline/Noradrenaline	6.90378e-05	0.00473822	1.61667	39.5876	64	311	20	22	30	ADCY5,ADCY6,ADRA2A,ADRA2C,CACNA1C,CACNA1D,CACNA2D2,CACNB2,CACNB3,DNAJC25,GNAI1,GNAI2,GNAO1,GNB1,GNB3,GNB4,GNG12,GNG2,GNG4,GNG8	ADCY5,ADCY6,ADRA2A,ADRA2C,CACNA1C,CACNA1D,CACNA2D2,CACNB2,CACNB3,DNAJC25,GNAI1,GNAI2,GNAO1,GNB1,GNB2,GNB3,GNB4,GNG12,GNG2,GNG4,GNG8,INS-IGF2
MSigDB Pathway	Gap junction	7.61241e-05	0.00507276	1.33511	122.836	164	965	47	67	90	ADCY2,ADCY5,ADCY6,ADCY7,ADCY8,ADCY9,ADRB1,CDC2,DRD1,DRD2,EGF,EGFR,GJA1,GJD2,GNAI1,GNAI2,GNAI3,GNAS,GRB2,GRM1,GRM5,GUCY1A2,GUCY1A3,HTR2A,HTR2B,HTR2C,ITPR1,MAP3K2,MAPK1,PDGFD,PDGFRA,PLCB4,PRKACA,PRKACG,PRKCA,PRKCB,PRKG1,PRKX,RAF1,SOS1,SOS2,SRC,TJP1,TUBA1B,TUBAL3,TUBB2A,TUBB6	ADCY2,ADCY3,ADCY5,ADCY6,ADCY7,ADCY8,ADCY9,ADRB1,CDC2,DRD1,DRD2,EGF,EGFR,GJA1,GJD2,GNAI1,GNAI2,GNAI3,GNAQ,GNAS,GNAS,GRB2,GRM1,GRM5,GUCY1A2,GUCY1A3,GUCY1B3,HTR2A,HTR2B,HTR2C,ITPR1,ITPR3,LPAR1,MAP2K1,MAP2K5,MAP3K2,MAPK1,MAPK3,PDGFB,PDGFC,PDGFD,PDGFRA,PDGFRB,PLCB1,PLCB2,PLCB3,PLCB4,PRKACA,PRKACB,PRKACG,PRKCA,PRKCB,PRKG1,PRKG2,PRKX,RAF1,SOS1,SOS2,SRC,TJP1,TUBA1B,TUBA1C,TUBAL3,TUBB1,TUBB2A,TUBB2B,TUBB6
MSigDB Pathway	G alpha 13 Pathway	8.33597e-05	0.00543002	1.5712	44.552	70	350	19	25	35	AKT2,AKT3,ARHGEF11,BCL2,MAP2K4,MAP3K1,MAP3K5,NFKB1,NFKBIA,PDK1,PHKA2,PIK3CB,PLD1,PLD3,PTK2,RDX,ROCK1,ROCK2,SRF	AKT2,AKT3,ARHGEF11,BCL2,CDC42,DLG4,GNA13,MAP2K4,MAP3K1,MAP3K5,MAPK8,NFKB1,NFKB2,NFKBIA,NFKBIL1,PDK1,PHKA2,PIK3CB,PLD1,PLD3,PTK2,RDX,ROCK1,ROCK2,SRF
MSigDB Pathway	Genes involved in p75 NTR receptor-mediated signalling	0.000131963	0.00774374	1.35931	100.051	136	786	46	67	83	AATF,ADAM17,ARHGEF11,ARHGEF12,ARHGEF17,ARHGEF18,ARHGEF2,ARHGEF3,ARHGEF6,ARHGEF7,BCL2L11,CASP3,ECT2,FGD2,FGD4,HDAC2,HDAC3,IRAK1,ITGB3BP,ITSN1,KALRN,KIAA1112,MCF2L,NET1,NFKB1,NFKBIA,NGEF,NGF,OMG,PREX1,PSEN2,RASGRF1,RASGRF2,RIPK2,RTN4,SORCS3,SOS1,SOS2,SQSTM1,TIAM1,TIAM2,TRIO,UBB,VAV1,VAV2,VAV3	AATF,ADAM17,AKAP13,APH1A,APH1B,ARHGAP4,ARHGEF11,ARHGEF12,ARHGEF16,ARHGEF17,ARHGEF18,ARHGEF2,ARHGEF3,ARHGEF6,ARHGEF7,BCL2L11,CASP3,ECT2,FGD1,FGD2,FGD4,HDAC1,HDAC2,HDAC3,IKBKB,IRAK1,ITGB3BP,ITSN1,KALRN,KIAA1112,MAPK8,MCF2,MCF2L,NCSTN,NET1,NFKB1,NFKBIA,NGEF,NGF,NGFR,OMG,PLEKHG5,PRDM4,PREX1,PRKCI,PSEN1,PSEN2,RAC1,RASGRF1,RASGRF2,RELA,RIPK2,RTN4,SORCS3,SOS1,SOS2,SQSTM1,TIAM1,TIAM2,TRAF6,TRIO,UBB,UBC,V…
MSigDB Pathway	Genes involved in mRNA Splicing - Minor Pathway	0.000166032	0.00939252	2.48084	7.25561	18	57	13	26	43	DDX23,GTF2F2,NCBP1,NCBP2,POLR2A,POLR2B,POLR2C,POLR2D,POLR2I,SFRS1,SFRS6,SNRNP40,TXNL4A	DDX23,EFTUD2,GTF2F1,GTF2F2,NCBP1,NCBP2,POLR2A,POLR2B,POLR2C,POLR2D,POLR2F,POLR2I,PRPF6,SF3B1,SF3B2,SF3B3,SF3B5,SFRS1,SFRS6,SFRS7,SNRNP200,SNRNP40,SNRPD1,SNRPE,SNRPF,TXNL4A
GO Cellular Component	ion channel complex	2.65612e-13	5.0414e-10	1.37688	347.887	479	2733	119	170	209	AKAP6,ANO1,ANO10,ANO2,ANO3,ANO4,ANO5,ANO6,ATP2A1,BEST1,CACNA1A,CACNA1B,CACNA1C,CACNA1D,CACNA1E,CACNA1G,CACNA1I,CACNA2D1,CACNA2D2,CACNB2,CACNB3,CACNB4,CACNG1,CACNG2,CACNG3,CHRNA1,CHRNA10,CHRNA4,CHRNA7,CHRNB2,CHRNB3,CLIC4,CLIC5,CLIC6,CNGB1,CNTN2,CNTNAP1,CNTNAP2,GABRA1,GABRA2,GABRA3,GABRA5,GABRA6,GABRB2,GABRB3,GABRG1,GABRG2,GABRG3,GABRP,GABRQ,GABRR1,GLRA1,GLRA3,KCNA1,KCNA10,KCNA2,KCNA4,KCNA5,KCNA6,K…	AKAP6,ANO1,ANO10,ANO2,ANO3,ANO4,ANO5,ANO6,ANO7,ANO8,ATP2A1,BEST1,BEST2,BEST4,CACNA1A,CACNA1B,CACNA1C,CACNA1D,CACNA1E,CACNA1G,CACNA1I,CACNA2D1,CACNA2D2,CACNB1,CACNB2,CACNB3,CACNB4,CACNG1,CACNG2,CACNG3,CFTR,CHRNA1,CHRNA10,CHRNA2,CHRNA4,CHRNA5,CHRNA6,CHRNA7,CHRNA9,CHRNB2,CHRNB3,CHRNB4,CHRND,CHRNG,CLCN1,CLCNKB,CLIC4,CLIC5,CLIC6,CNGA2,CNGB1,CNTN2,CNTNAP1,CNTNAP2,FKBP1B,FXYD3,GABRA1,GABRA2,GABRA3,GABRA…
GO Cellular Component	synaptonemal complex	5.00248e-11	3.72097e-08	4.00502	6.49186	26	51	11	13	22	BLM,INCENP,MLH1,MSH5,SMC1B,SYCE2,SYCP1,SYCP2,SYN1,TEX11,WAPAL	BLM,INCENP,MLH1,MSH4,MSH5,SMC1B,SMC3,SYCE2,SYCP1,SYCP2,SYN1,TEX11,WAPAL
GO Cellular Component	condensed nuclear chromosome	1.03614e-08	3.47756e-06	1.88824	42.8972	81	337	24	35	57	BLM,BUB1,CENPC1,DMC1,INCENP,MKI67IP,MLH1,MRE11A,MSH5,NDC80,RCC1,RGS12,RRS1,SGOL1,SMC1B,SUV39H1,SUV420H1,SYCE2,SYCP1,SYCP2,SYN1,TEX11,TTN,WAPAL	ADD3,BLM,BUB1,CDX2,CENPC1,CHEK1,DMC1,INCENP,LRPPRC,MKI67IP,MLH1,MRE11A,MSH4,MSH5,NDC80,NEK2,PLK1,RCC1,RGS12,RPA1,RRS1,SGOL1,SMC1A,SMC1B,SMC3,SUV39H1,SUV420H1,SUV420H2,SYCE2,SYCP1,SYCP2,SYN1,TEX11,TTN,WAPAL
GO Cellular Component	cullin-RING ubiquitin ligase complex	4.58489e-07	8.49717e-05	1.7122	49.6436	85	390	25	33	53	C10orf46,CRBN,CUL1,CUL3,CUL4B,DCAF10,DCAF16,DCAF17,DCAF5,DCAF6,DDB1,DTL,FBXL5,FBXO15,FBXO31,FBXW11,FBXW7,FBXW8,KCTD13,KLHL13,KLHL21,RBX1,SKP1,SKP2,ZER1	C10orf46,CRBN,CUL1,CUL3,CUL4B,DCAF10,DCAF16,DCAF17,DCAF5,DCAF6,DCAF8,DDB1,DTL,FBXL5,FBXO15,FBXO2,FBXO31,FBXO4,FBXW11,FBXW7,FBXW8,KCTD10,KCTD13,KLHL13,KLHL20,KLHL21,RBX1,SKP1,SKP2,TNFAIP1,TRIM21,TRPC4AP,ZER1
GO Cellular Component	P granule	3.96646e-06	0.000483022	3.57091	4.20062	15	33	5	8	10	MAEL,PIWIL1,PIWIL4,TDRD7,TDRD9	ASZ1,MAEL,PIWIL1,PIWIL2,PIWIL4,TDRD1,TDRD7,TDRD9
GO Cellular Component	nuclear pore	1.02803e-05	0.00103637	1.70782	38.0601	65	299	31	51	73	AGFG1,AHCTF1,DDX19B,GLE1,IPO5,KPNA1,KPNA4,KPNA7,KPNB1,LBR,MAD2L1,MVP,NUP133,NUP155,NUP210,NUP214,NUP35,NUP50,NUP62CL,NUP85,NUP88,NUP93,RAN,RANBP17,RANBP2,RANBP3,SEC13,SEH1L,SENP2,SNUPN,TNKS	AAAS,AGFG1,AHCTF1,DDX19B,EIF5A,EIF5A2,EIF5AL1,GLE1,IPO5,KPNA1,KPNA2,KPNA3,KPNA4,KPNA7,KPNB1,LBR,LOC146880,MAD2L1,MVP,MYO1C,NUP107,NUP133,NUP153,NUP155,NUP160,NUP205,NUP210,NUP214,NUP35,NUP37,NUP50,NUP54,NUP62CL,NUP85,NUP88,NUP93,NUPL2,NXF1,RAN,RANBP17,RANBP2,RANBP3,RANGAP1,SEC13,SEH1L,SENP2,SNUPN,SUMO1,TNKS,XPO7,XPOT
GO Cellular Component	filopodium	1.08863e-05	0.00108162	1.74578	34.3687	60	270	20	30	35	ABI2,ACTN2,ARL4C,BAIAP2,DAG1,ENAH,FAM65B,FGD4,FSCN1,FZD9,MYO3A,PODXL,PPP1R9A,RDX,RUFY3,SLC9A3R1,SYNE2,TIAM2,VASP,VCAM1	ABI1,ABI2,ACTN2,AKAP5,ANTXR1,ARL4C,BAIAP2,CDC42,DAG1,ENAH,ERMN,EZR,FAM65B,FGD4,FSCN1,FZD9,MYO3A,NF2,NGDN,PDPN,PODXL,PPP1R9A,RAPH1,RDX,RUFY3,SLC9A3R1,SYNE2,TIAM2,VASP,VCAM1
GO Cellular Component	XY body	1.31799e-05	0.00127498	3.64743	3.56416	13	28	6	7	11	ATR,MAEL,PBX4,RAD18,SIN3B,UBE2B	ATR,MAEL,PBX4,RAD18,SIN3B,UBE2A,UBE2B
GO Cellular Component	condensed chromosome	1.61336e-05	0.00147027	1.3423	141.548	190	1112	64	93	138	AHCTF1,AKAP8,BAZ1B,BLM,BUB1,BUB3,CENPC1,CENPE,CENPN,CENPT,CENPV,CLASP1,CLASP2,CREBBP,CSNK1A1,DMC1,DSN1,DYNC1I1,EP300,HJURP,HMGB1,HMGB2,INCENP,KIF2B,KNTC1,L3MBTL,LIG4,MAD2L1,MKI67,MKI67IP,MLF1IP,MLH1,MRE11A,MSH5,NCAPG,NDC80,NDEL1,NUF2,NUP133,NUP85,PMF1,RCC1,RGS12,RRS1,SEH1L,SEPT7,SGOL1,SKA1,SMC1B,SMC2,SOX7,SPC25,SUV39H1,SUV420H1,SYCE2,SYCP1,SYCP2,SYN1,TEX11,TOP3B,TP53BP1,TTN,WAPAL,ZWINT	ADD3,AHCTF1,AKAP8,BAZ1B,BLM,BOD1,BRCA1,BUB1,BUB3,CCDC99,CDX2,CENPC1,CENPE,CENPM,CENPN,CENPT,CENPV,CHEK1,CLASP1,CLASP2,CREBBP,CSNK1A1,CTCF,DMC1,DSN1,DYNC1I1,DYNC1LI1,EP300,ERCC6L,H2AFY,HJURP,HMGB1,HMGB2,INCENP,KIF2B,KNTC1,L3MBTL,LIG4,LRPPRC,MAD2L1,MKI67,MKI67IP,MLF1IP,MLH1,MRE11A,MSH4,MSH5,NCAPG,NDC80,NDE1,NDEL1,NEK2,NUF2,NUP107,NUP133,NUP37,NUP85,ORC2L,PAM,PLK1,PMF1,RANGAP1,RCC1,RGS12,RPA1,RRS1,S…
GO Cellular Component	chromosome, centromeric region	1.86302e-05	0.00165664	1.32098	157.459	208	1237	61	94	138	AHCTF1,APC,BAZ1B,BUB1,BUB3,C14orf106,CDKL3,CENPC1,CENPE,CENPI,CENPN,CENPT,CENPV,CLASP1,CLASP2,CLIP1,CORT,CREBBP,CSNK1A1,DNMT1,DNMT3A,DSN1,DYNC1I1,EP300,HJURP,IKZF1,INCENP,ITGB3BP,JRKL,KIF2B,KNTC1,MAD2L1,MKI67,MLF1IP,NDC80,NDEL1,NUF2,NUP133,NUP85,PAFAH1B1,PMF1,PPP2R5A,PPP2R5C,PSEN2,RCC2,SEC13,SEH1L,SEPT7,SGOL1,SKA1,SMC1B,SOX7,SPC25,SUV39H1,SUV39H2,SUV420H1,TIGD2,TIGD6,TP53BP1,XPO1,ZWINT	AHCTF1,APC,BAZ1B,BOD1,BUB1,BUB3,C14orf106,C21orf45,C6orf173,CBX5,CCDC99,CDCA8,CDKL3,CENPC1,CENPE,CENPI,CENPM,CENPN,CENPT,CENPV,CLASP1,CLASP2,CLIP1,CORT,CREBBP,CSNK1A1,CTCF,DCTN1,DCTN2,DNMT1,DNMT3A,DSN1,DYNC1I1,DYNC1LI1,EP300,ERCC6L,HJURP,IKZF1,INCENP,ITGB3BP,JRKL,KIF2B,KNTC1,MAD2L1,MKI67,MLF1IP,NDC80,NDE1,NDEL1,NEK2,NUF2,NUP107,NUP133,NUP160,NUP37,NUP85,OIP5,ORC2L,PAFAH1B1,PBRM1,PLK1,PMF1,PPP2CB,…
GO Cellular Component	microtubule associated complex	2.05754e-05	0.00179482	1.44811	82.8667	120	651	46	75	96	APPBP2,CLIP2,DCX,DNAH11,DNAH14,DNAH17,DNAH5,DNAH6,DNAH8,DNAH9,DNAI1,DNAI2,DNAL4,DNHD1,DYNC1I1,DYNC1I2,DYNC1LI2,DYNC2H1,DYNLL2,DYNLRB1,DYNLRB2,EML1,FNTA,HAUS4,KATNB1,KIF11,KIF15,KIF1B,KIF25,KIF3C,KIF5A,KIF5C,KIFAP3,KIFC3,KLC2,MAP1A,MAP1B,MAP2,MAP4,MAP7,MAPT,MID1,NDEL1,NPHP3,PAFAH1B1,RANBP9	ACTR10,ACTR1A,APPBP2,CDCA8,CLIP2,DCTN1,DCTN2,DCX,DNAH1,DNAH11,DNAH14,DNAH17,DNAH2,DNAH3,DNAH5,DNAH6,DNAH7,DNAH8,DNAH9,DNAI1,DNAI2,DNAL4,DNALI1,DNEL2,DNHD1,DYNC1H1,DYNC1I1,DYNC1I2,DYNC1LI1,DYNC1LI2,DYNC2H1,DYNC2LI1,DYNLL1,DYNLL2,DYNLRB1,DYNLRB2,EML1,FNTA,FNTB,HAUS1,HAUS2,HAUS3,HAUS4,HAUS6,HAUS7,HDAC6,KATNB1,KIF11,KIF15,KIF1B,KIF25,KIF3B,KIF3C,KIF5A,KIF5B,KIF5C,KIFAP3,KIFC3,KLC2,MAP1A,MAP1B,MAP2,MA…
GO Cellular Component	axon terminus	2.18014e-05	0.00186918	1.34674	133.656	180	1050	30	42	49	CACNA1B,CCKAR,CHRM1,CHRM2,CHRM3,DPYSL2,DRD2,ESR1,GABRB3,GHRH,GOT1,GRIA2,GRIA3,GRIA4,GRIK1,GRIK2,GRIK3,GRIK4,HCN4,KCNMA1,MYLK2,NMU,NR3A1,NTRK2,OPRD1,P2RX4,P2RX7,PRSS12,PTPRN2,SYNJ2	ADORA1,ATP6V0D1,CABP4,CACNA1B,CASR,CCK,CCKAR,CHRM1,CHRM2,CHRM3,CHRM4,DPYSL2,DRD2,ESR1,GABRB3,GHRH,GOT1,GRIA2,GRIA3,GRIA4,GRIK1,GRIK2,GRIK3,GRIK4,HCN4,ILK,KCNMA1,L1CAM,MYLK2,NMU,NR3A1,NTRK2,OPRD1,P2RX3,P2RX4,P2RX7,PCSK1,PEBP1,PRSS12,PTPRN2,SYNJ2,TH
GO Cellular Component	transcription factor TFIID complex	2.33589e-05	0.00198724	2.82816	6.36457	18	50	6	11	20	TAF1L,TAF3,TAF4,TAF4B,TAF5,TAF7	TAF12,TAF13,TAF1L,TAF2,TAF3,TAF4,TAF4B,TAF5,TAF7,TAF7L,TAF8
GO Cellular Component	organelle subcompartment	3.68742e-05	0.00285869	1.46776	71.5378	105	562	41	53	81	ACPP,ARAP1,ASAP2,ATL1,B4GALNT3,B4GALT1,B4GALT3,B4GALT5,B4GALT6,CANT1,CHSY1,CHSY3,COG3,FKBP1A,FREQ,FUT10,FUT8,FUT9,GALNT2,GALNT3,GLG1,GOLGA1,GOLIM4,GOLPH3,GORASP2,GPR89A,HMP19,NAGPA,PLD1,RYR1,SCFD1,SGMS1,SMPD3,SORT1,ST3GAL1,ST3GAL2,ST3GAL3,ST3GAL4,ST6GAL2,UXS1,YIPF5	ACPP,APH1A,ARAP1,ASAP2,ATL1,B4GALNT3,B4GALT1,B4GALT3,B4GALT5,B4GALT6,CANT1,CHSY1,CHSY3,COG3,CSGALNACT1,CSGALNACT2,FKBP1A,FREQ,FURIN,FUT10,FUT11,FUT8,FUT9,GAL3ST4,GALNT1,GALNT2,GALNT3,GLG1,GOLGA1,GOLGA2,GOLGA5,GOLIM4,GOLPH3,GOLPH3L,GORASP2,GPR89A,HMP19,NAGPA,PITPNM1,PLD1,RYR1,SAR1B,SCFD1,SGMS1,SMPD3,SORT1,ST3GAL1,ST3GAL2,ST3GAL3,ST3GAL4,ST6GAL2,UXS1,YIPF5
GO Cellular Component	ubiquitin ligase complex	4.59369e-05	0.00338488	1.32902	135.438	180	1064	60	96	134	ANAPC1,ANAPC4,ANAPC7,BMI1,BRCC3,BRE,C10orf46,CAND1,CDC27,CRBN,CUL1,CUL3,CUL4B,DCAF10,DCAF16,DCAF17,DCAF5,DCAF6,DCUN1D1,DDB1,DTL,FBXL12,FBXL4,FBXL5,FBXL7,FBXO11,FBXO15,FBXO21,FBXO3,FBXO31,FBXO8,FBXO9,FBXW11,FBXW7,FBXW8,HERC2,KCTD13,KLHL13,KLHL21,MYCBP2,NEDD4,PPIL2,PRPF19,RBBP6,RBX1,RING1,RNF144B,RNF168,RNF20,SKP1,SKP2,TSPAN17,UBE2E1,UBE2L3,UBE2S,UBE4B,WDSUB1,WWP1,ZER1,ZZEF1	ANAPC1,ANAPC13,ANAPC4,ANAPC5,ANAPC7,ARIH1,BARD1,BMI1,BRCA1,BRCC3,BRE,C10orf104,C10orf46,CAND1,CBLL1,CBX8,CDC23,CDC27,CRBN,CUL1,CUL3,CUL4B,DCAF10,DCAF16,DCAF17,DCAF5,DCAF6,DCAF8,DCUN1D1,DDB1,DTL,FBXL12,FBXL21,FBXL3,FBXL4,FBXL5,FBXL7,FBXO11,FBXO15,FBXO2,FBXO21,FBXO3,FBXO31,FBXO4,FBXO7,FBXO8,FBXO9,FBXW11,FBXW4,FBXW7,FBXW8,HERC2,HSPB11,KCTD10,KCTD13,KLHL13,KLHL20,KLHL21,LMO7,MIB2,MYCBP2,NEDD4,OS9,PPI…
GO Cellular Component	actin cytoskeleton	6.97191e-05	0.00477902	1.20382	320.647	386	2519	134	233	297	ABLIM1,ABLIM2,ABRA,ACTC1,ACTG2,ACTL7B,ACTN2,ACTN4,ACTR3,ADAM17,ADD1,ADD2,AFAP1,AMOT,AMPH,ARHGAP6,ARPC1A,AVIL,BIN1,CALD1,CAPZB,CASK,CD2AP,CDC42EP3,CDC42EP4,CFL1,CIT,CLIC4,CLIC5,CORO1C,CORO2B,CTNNA1,CTNNA2,CTNNA3,CTTNBP2NL,DAPK1,DBN1,DLC1,DYNC1I2,DYNLL2,EPB41L2,ESPN,FERMT3,FHL2,FILIP1L,FMN1,FMN2,FSCN1,GAS7,GNG12,GRLF1,H1F0,HDAC4,IQGAP2,JUP,KALRN,KLHL2,KPTN,LANCL2,LASP1,LIMA1,LSP1,MACF1,MARCKS,MLPH,…	ABLIM1,ABLIM2,ABRA,ACTA1,ACTC1,ACTG2,ACTL7B,ACTN1,ACTN2,ACTN4,ACTR10,ACTR1A,ACTR2,ACTR3,ADAM17,ADD1,ADD2,AFAP1,ALDOA,AMOT,AMPH,ANLN,ARHGAP6,ARPC1A,ARPC1B,ARPC2,ARPC5,AVIL,BIN1,BMF,CALD1,CAP1,CAPG,CAPZA2,CAPZA3,CAPZB,CASK,CD2AP,CDC42EP1,CDC42EP3,CDC42EP4,CDH1,CFL1,CGN,CIT,CLIC4,CLIC5,CORO1A,CORO1C,CORO2B,CRYAB,CTNNA1,CTNNA2,CTNNA3,CTNNAL1,CTTNBP2NL,DAPK1,DBN1,DCTN2,DFNB31,DLC1,DSTN,DYNC1I2,DYNLL2,…
GO Cellular Component	Golgi stack	8.07809e-05	0.00533784	1.3922	90.5042	126	711	51	68	103	A4GALT,ACPP,ARAP1,ASAP2,ATL1,B4GALNT3,B4GALT1,B4GALT3,B4GALT5,B4GALT6,CANT1,CHSY1,CHSY3,CLIP3,COG2,COG3,DNMBP,FREQ,FUT10,FUT8,FUT9,GALNT2,GALNT3,GLG1,GOLGA1,GOLGB1,GOLIM4,GOLPH3,GORASP2,GPR89A,HMP19,ICA1,LPCAT2,MBTPS1,NAGPA,OCRL,PLD1,SCFD1,SGMS1,SMPD3,SORT1,ST3GAL1,ST3GAL2,ST3GAL3,ST3GAL4,ST6GAL2,SULF1,SULF2,TOM1L1,UXS1,YIPF5	A4GALT,A4GNT,ACPP,APH1A,ARAP1,ASAP2,ATL1,B4GALNT3,B4GALT1,B4GALT3,B4GALT5,B4GALT6,CANT1,CHSY1,CHSY3,CLIP3,COG2,COG3,CSGALNACT1,CSGALNACT2,DNMBP,FREQ,FURIN,FUT10,FUT11,FUT8,FUT9,GAL3ST4,GALNT1,GALNT2,GALNT3,GLG1,GOLGA1,GOLGA2,GOLGA5,GOLGB1,GOLIM4,GOLPH3,GOLPH3L,GORASP2,GPR89A,HMP19,ICA1,LPCAT2,MBTPS1,NAGPA,NSFL1C,OCRL,PIP5K1A,PITPNM1,PLD1,RAB14,RAB30,SAR1B,SCFD1,SGMS1,SMPD3,SORT1,ST3GAL1,ST3GAL2,S…
GO Cellular Component	pronucleus	0.000128844	0.00758498	2.52514	7.12832	18	56	6	8	15	AKAP8,BLM,EED,EZH2,RIF1,TCL1A	AKAP8,BLM,CCNA2,EED,EZH2,HNF1A,RIF1,TCL1A
GO Cellular Component	axon part	0.00014155	0.00816702	1.23188	228.106	281	1792	55	76	88	ADORA2A,ADORA2A,APC,CACNA1B,CCKAR,CHRM1,CHRM2,CHRM3,CNTN2,CNTNAP1,CNTNAP2,CRHR1,DPYSL2,DRD2,DTNBP1,EPB41L3,ESR1,FKBP4,GABRB3,GAN,GHRH,GOT1,GRIA2,GRIA3,GRIA4,GRIK1,GRIK2,GRIK3,GRIK4,HCN4,INA,KCNA1,KCNA2,KCNMA1,MAP2K4,MAPK1,MBP,MYLK2,MYO1D,NEFL,NEFM,NFASC,NMU,NR3A1,NTRK2,OPRD1,P2RX4,P2RX7,PRSS12,PTPRN2,ROBO1,ROBO2,SCN8A,SPTBN4,SYNJ2	ADORA1,ADORA2A,ADORA2A,APC,ATP6V0D1,CABP4,CACNA1B,CASR,CCK,CCKAR,CHRM1,CHRM2,CHRM3,CHRM4,CNTN2,CNTNAP1,CNTNAP2,CRHR1,DPYSL2,DRD2,DTNBP1,EPB41L3,ERMN,ESR1,FKBP4,GABBR1,GABRB3,GAN,GHRH,GOT1,GRIA2,GRIA3,GRIA4,GRIK1,GRIK2,GRIK3,GRIK4,HCN4,HTR1A,ILK,INA,KCNA1,KCNA2,KCNAB2,KCNMA1,L1CAM,MAP2K1,MAP2K4,MAP3K12,MAPK1,MBP,MYLK2,MYO1D,NEFH,NEFL,NEFM,NFASC,NMU,NR3A1,NTRK2,OPRD1,P2RX3,P2RX4,P2RX7,PCSK1,PEBP1,P…
GO Molecular Function	transporter activity	2.02806e-19	1.86051e-15	1.2336	1280.81	1580	10062	503	817	1189	AASDH,ABCA3,ABCA4,ABCB1,ABCB5,ABCC1,ABCC3,ABCC4,ABCC5,ABCG1,ACCN1,ACCN2,ALDH1L1,AMBP,ANKH,ANO1,ANO10,ANO2,ANO3,ANO4,ANO5,ANO6,AP2A1,AP2B1,AP2S1,AP3B1,AP4S1,APOB,AQP12B,AQP4,AQP9,ARFGAP3,ASNA1,ASPN,ATP10A,ATP10B,ATP11A,ATP11B,ATP11C,ATP13A3,ATP1A1,ATP1A3,ATP1B1,ATP2A1,ATP2B1,ATP2B2,ATP2B3,ATP4A,ATP5H,ATP5J,ATP5S,ATP6V0A2,ATP6V0C,ATP6V0D2,ATP6V0E1,ATP6V0E2,ATP6V1A,ATP6V1C1,ATP6V1E1,ATP6V1G3,ATP6V1H…	AASDH,ABCA1,ABCA3,ABCA4,ABCB1,ABCB10,ABCB4,ABCB5,ABCB9,ABCC1,ABCC12,ABCC13,ABCC2,ABCC3,ABCC4,ABCC5,ABCC6,ABCC8,ABCD1,ABCD3,ABCF2,ABCG1,ABCG5,ABCG8,ACCN1,ACCN2,ACCN4,ADAMTS8,AKR1C4,ALDH1L1,AMBP,ANKH,ANO1,ANO10,ANO2,ANO3,ANO4,ANO5,ANO6,ANO7,ANO8,AP1B1,AP1G1,AP1G2,AP1S1,AP1S2,AP1S3,AP2A1,AP2B1,AP2M1,AP2S1,AP3B1,AP3B2,AP3S1,AP4S1,APOA1,APOB,APOL1,APOL3,AQP12A,AQP12B,AQP3,AQP4,AQP6,AQP9,ARFGAP3,ASNA1,…
GO Molecular Function	S-adenosylmethionine-dependent methyltransferase activity	9.39651e-16	3.97855e-12	1.88036	86.6854	163	681	52	67	93	ASH1L,BHMT,C1orf25,CARM1,COMT,COQ3,DNMT1,DNMT3A,DNMT3B,DPH5,EHMT1,EHMT2,EZH2,FBXO11,GSTCD,ICMT,LRTOMT,MLL,MLL3,MLL5,MTR,NNMT,NSD1,NSUN2,PCMT1,PCMTD1,PCMTD2,PEMT,PRDM2,PRDM6,PRDM9,PRMT3,PRMT6,PRMT8,RBBP5,RNMT,RRP8,SETD2,SETD7,SETD8,SETDB2,SETMAR,SMYD3,SUV39H1,SUV39H2,SUV420H1,TFB2M,TRMT5,WDR4,WDR5,WHSC1,WHSC1L1	ASH1L,ASH2L,BHMT,C1orf25,CARM1,COMT,COQ3,DIMT1L,DNMT1,DNMT3A,DNMT3B,DPH5,EHMT1,EHMT2,EZH1,EZH2,FBXO11,GSTCD,ICMT,LRTOMT,MLL,MLL2,MLL3,MLL5,MTR,NNMT,NOP2,NSD1,NSUN2,PCMT1,PCMTD1,PCMTD2,PEMT,PNMT,PRDM2,PRDM6,PRDM9,PRMT3,PRMT5,PRMT6,PRMT7,PRMT8,RBBP5,RNMT,RRP8,SETD1A,SETD1B,SETD2,SETD7,SETD8,SETDB1,SETDB2,SETMAR,SMYD3,SUV39H1,SUV39H2,SUV420H1,SUV420H2,TFB1M,TFB2M,TRMT5,TRMT61A,TRMT61B,WDR4,WDR5,WHSC…
GO Molecular Function	nucleoside-triphosphatase regulator activity	2.70403e-14	6.76535e-11	1.29358	602.979	780	4737	238	341	438	ABL1,ACAP2,ADAP2,AGAP1,AGAP2,AGAP3,AGFG1,AHSA1,ALDH1A1,ALS2,ANXA2,ARAP1,ARAP2,ARAP3,ARFGAP3,ARFGEF1,ARHGAP10,ARHGAP11B,ARHGAP15,ARHGAP17,ARHGAP18,ARHGAP20,ARHGAP21,ARHGAP24,ARHGAP25,ARHGAP26,ARHGAP27,ARHGAP28,ARHGAP5,ARHGAP6,ARHGEF10L,ARHGEF11,ARHGEF12,ARHGEF17,ARHGEF18,ARHGEF2,ARHGEF3,ARHGEF6,ARHGEF7,ARL2BP,ASAP1,ASAP2,ASAP3,ATP8A1,C6orf170,CCDC64,CDC42BPA,CHML,CIT,CYTH1,CYTH3,CYTH4,DAB2IP,DEPDC…	ABL1,ACAP2,ADAP2,AGAP1,AGAP2,AGAP3,AGAP4,AGAP6,AGFG1,AGFG2,AHSA1,AHSA2,AKAP13,ALDH1A1,ALS2,ANXA2,ARAP1,ARAP2,ARAP3,ARFGAP2,ARFGAP3,ARFGEF1,ARFGEF2,ARHGAP10,ARHGAP11B,ARHGAP12,ARHGAP15,ARHGAP17,ARHGAP18,ARHGAP19,ARHGAP20,ARHGAP21,ARHGAP22,ARHGAP23,ARHGAP24,ARHGAP25,ARHGAP26,ARHGAP27,ARHGAP28,ARHGAP29,ARHGAP4,ARHGAP5,ARHGAP6,ARHGEF10L,ARHGEF11,ARHGEF12,ARHGEF16,ARHGEF17,ARHGEF18,ARHGEF19,ARHGEF2,AR…
GO Molecular Function	GABA-A receptor activity	7.76092e-14	1.77994e-10	2.64623	24.1854	64	190	13	16	19	GABRA1,GABRA2,GABRA3,GABRA5,GABRA6,GABRB2,GABRB3,GABRG1,GABRG2,GABRG3,GABRP,GABRQ,GABRR1	GABRA1,GABRA2,GABRA3,GABRA5,GABRA6,GABRB2,GABRB3,GABRD,GABRE,GABRG1,GABRG2,GABRG3,GABRP,GABRQ,GABRR1,GABRR3
GO Molecular Function	histone methyltransferase activity	1.63843e-12	2.19962e-09	1.90496	63.5184	121	499	28	38	44	ASH1L,CARM1,EED,EHMT1,EHMT2,EZH2,MLL,MLL3,MLL5,NSD1,PRDM2,PRDM6,PRDM9,PRMT6,PRMT8,RBBP5,SETD2,SETD7,SETD8,SETDB2,SETMAR,SMYD3,SUV39H1,SUV39H2,SUV420H1,WDR5,WHSC1,WHSC1L1	ASH1L,ASH2L,CARM1,EED,EHMT1,EHMT2,EZH1,EZH2,MLL,MLL2,MLL3,MLL5,NSD1,PRDM2,PRDM6,PRDM9,PRMT5,PRMT6,PRMT7,PRMT8,RBBP5,SETD1A,SETD1B,SETD2,SETD7,SETD8,SETDB1,SETDB2,SETMAR,SMYD3,SUV39H1,SUV39H2,SUV420H1,SUV420H2,SUZ12,WDR5,WHSC1,WHSC1L1
GO Molecular Function	protein methyltransferase activity	4.44003e-12	5.09152e-09	1.7673	82.6121	146	649	39	49	59	ASH1L,C12orf72,C1orf156,CARM1,EED,EHMT1,EHMT2,EZH2,FBXO11,HEMK1,ICMT,MLL,MLL3,MLL5,N6AMT1,NSD1,PCMT1,PCMTD1,PCMTD2,PRDM2,PRDM6,PRDM9,PRMT1,PRMT3,PRMT6,PRMT8,RBBP5,SETD2,SETD7,SETD8,SETDB2,SETMAR,SMYD3,SUV39H1,SUV39H2,SUV420H1,WDR5,WHSC1,WHSC1L1	ASH1L,ASH2L,C12orf72,C1orf156,CARM1,EED,EHMT1,EHMT2,EZH1,EZH2,FBXO11,HEMK1,ICMT,MLL,MLL2,MLL3,MLL5,N6AMT1,NSD1,PCMT1,PCMTD1,PCMTD2,PRDM2,PRDM6,PRDM9,PRMT1,PRMT3,PRMT5,PRMT6,PRMT7,PRMT8,RBBP5,SETD1A,SETD1B,SETD2,SETD7,SETD8,SETDB1,SETDB2,SETMAR,SMYD3,SUV39H1,SUV39H2,SUV420H1,SUV420H2,SUZ12,WDR5,WHSC1,WHSC1L1
GO Molecular Function	hydrolase activity, acting on ester bonds	5.62854e-12	6.07474e-09	1.2377	735.235	910	5776	312	470	722	ABHD12,ABHD2,ACOT11,ACOT12,ACOT7L,ACP6,ACPL2,ACPP,ACSBG2,AK094504,ALPP,AOAH,APLF,APTX,ARSA,ARSB,ARSI,ASPG,ATP1A1,ATXN3L,AX746903,BCHE,BRCC3,C14orf126,C20orf3,C2orf79,CAMK2G,CCDC155,CCR5,CDC14A,CDC14B,CDC25A,CDKL3,CDKN3,CES7,CHKA,CHRM1,CHRM3,CHRM5,CNOT6,CNOT6L,CNP,CTDP1,CTDSP2,CTDSPL,CTDSPL2,CYCS,DAGLA,DAPP1,DCLRE1C,DDHD1,DFFB,DICER1,DIS3,DIS3L,DIS3L2,DLG1,DLGAP5,DNAJC6,DNASE1L3,DNASE2B,DOCK5,DUPD…	ABHD12,ABHD15,ABHD2,ABHD3,ABHD6,ACHE,ACOT11,ACOT12,ACOT7,ACOT7L,ACP6,ACPL2,ACPP,ACSBG2,AEN,AK094504,ALDH6A1,ALPL,ALPP,AOAH,APLF,APTX,ARSA,ARSB,ARSG,ARSI,ARSJ,ASPG,ATP1A1,ATXN3L,AX746903,BAAT,BCHE,BPGM,BRCC3,C12orf5,C14orf126,C17orf49,C20orf3,C2orf79,C3AR1,C3orf33,CAMK2G,CASR,CCDC155,CCKBR,CCR5,CDC14A,CDC14B,CDC25A,CDC25C,CDKL3,CDKN3,CES1,CES7,CHKA,CHRM1,CHRM3,CHRM5,CNOT6,CNOT6L,CNP,CTDP1,CTDSP2,C…
GO Molecular Function	lyase activity	8.62477e-11	6.24649e-08	1.56342	128.564	201	1010	66	107	164	ABCC1,ACLY,ACO1,ADC,ADCY2,ADCY5,ADCY6,ADCY7,ADCY8,ADCY9,ADSL,ALDOB,AMD1,APLF,AUH,BCKDHB,C10orf134,C20orf3,CA1,CA13,CA2,CA3,CA4,CA5BP,CA6,CA8,CD38,CENPV,CLYBL,CRY1,CSAD,CTH,DERA,EHHADH,ENO2,GAD1,GAD2,GADL1,GLDC,GMDS,GNAL,GOT1,GUCY1A2,GUCY1A3,GUCY2D,GUCY2E,HADHA,HCCS,HSD17B4,MAML1,MGST2,NEIL3,NPL,ODC1,PAICS,PCBD1,PDXDC1,PISD,PPCDC,PTPLB,SCLY,THNSL1,UMPS,UROD,UXS1,XRCC5	ABCC1,ACCSL,ACLY,ACMSD,ACO1,ACO2,ADC,ADCY2,ADCY3,ADCY5,ADCY6,ADCY7,ADCY8,ADCY9,ADSL,ALDOA,ALDOB,ALKBH1,AMD1,APIP,APLF,AUH,BCKDHB,C10orf134,C20orf3,CA1,CA12,CA13,CA14,CA2,CA3,CA4,CA5BP,CA6,CA7,CA8,CCBL2,CD38,CENPV,CLYBL,CRY1,CRY2,CSAD,CTH,CYP17A1,DDC,DERA,EHHADH,ENO2,FECH,FH,GAD1,GAD2,GADL1,GLDC,GLUL,GMDS,GNAL,GOT1,GUCY1A2,GUCY1A3,GUCY1B2,GUCY1B3,GUCY2D,GUCY2E,GUCY2F,HADHA,HCCS,HDC,HMGCLL1,HSD17B4…
GO Molecular Function	N-methyltransferase activity	1.4054e-09	6.5557e-07	1.67361	80.0663	134	629	37	49	58	ASH1L,C1orf25,CARM1,EHMT1,EHMT2,EZH2,FBXO11,HEMK1,HNMT,MLL,MLL3,MLL5,NNMT,NSD1,PEMT,PRDM2,PRDM6,PRDM9,PRMT1,PRMT3,PRMT6,PRMT8,RBBP5,RNMT,SETD2,SETD7,SETD8,SETDB2,SETMAR,SMYD3,SUV39H1,SUV39H2,SUV420H1,TFB2M,WDR5,WHSC1,WHSC1L1	ASH1L,ASH2L,C1orf25,CARM1,DIMT1L,EHMT1,EHMT2,EZH1,EZH2,FBXO11,HEMK1,HNMT,MLL,MLL2,MLL3,MLL5,NNMT,NSD1,PEMT,PNMT,PRDM2,PRDM6,PRDM9,PRMT1,PRMT3,PRMT5,PRMT6,PRMT7,PRMT8,RBBP5,RNMT,SETD1A,SETD1B,SETD2,SETD7,SETD8,SETDB1,SETDB2,SETMAR,SMYD3,SUV39H1,SUV39H2,SUV420H1,SUV420H2,TFB1M,TFB2M,WDR5,WHSC1,WHSC1L1
GO Molecular Function	amine binding	3.77802e-09	1.56356e-06	1.473	146.64	216	1152	54	87	120	AARS,ACPP,ADRA2A,ADRA2C,ADRB1,ADRB2,AGXT,ALDOB,BCHE,C2orf83,CHKA,CHRFAM7A,CHRM1,CHRM2,CHRM3,CHRM5,CHRNA1,CHRNA4,CHRNA7,CHRNB2,CHRNB3,DPYS,DRD1,DRD2,FOLR2,GLRA1,GLRA3,GLUD1,GLUD2,GRIK1,GRIN2A,GRIN2B,GRIN3A,GRM7,HTR1B,HTR1F,HTR2A,HTR2B,HTR2C,MTHFS,MTR,NEDD4,NOS1,NOS2,OTC,PAH,PCTP,PIN1,SLC19A3,SLC1A1,SLC1A3,SLC6A3,TPH2,YWHAB	AARS,ACHE,ACPP,ADRA2A,ADRA2B,ADRA2C,ADRB1,ADRB2,AGXT,ALAS2,ALDOB,ANXA9,APOC1,BCHE,C2orf83,CHKA,CHRFAM7A,CHRM1,CHRM2,CHRM3,CHRM4,CHRM5,CHRNA1,CHRNA2,CHRNA4,CHRNA5,CHRNA6,CHRNA7,CHRNB2,CHRNB3,CHRNB4,CHRND,CHRNG,CRP,DPYS,DRD1,DRD2,DRD3,DRD5,FOLR2,GCLC,GLRA1,GLRA2,GLRA3,GLRB,GLUD1,GLUD2,GRIK1,GRIN1,GRIN2A,GRIN2B,GRIN2D,GRIN3A,GRM7,GSS,HDC,HTR1A,HTR1B,HTR1D,HTR1F,HTR2A,HTR2B,HTR2C,HTR3A,MTHFS,MTR,NEDD…
GO Molecular Function	olfactory receptor activity	4.57378e-09	1.81118e-06	2.38663	20.112	48	158	32	66	384	OR10G2,OR10J1,OR11H4,OR13C9,OR13H1,OR1D4,OR2A9P,OR2A9P,OR2C1,OR2K2,OR2S2,OR4E2,OR51E2,OR51F1,OR51F2,OR51T1,OR52D1,OR52I2,OR52K1,OR52K2,OR52R1,OR56B4,OR6S1,OR7C2,OR8B12,OR8B4,OR8B8,OR8S1,OR9A2,OR9I1,OR9Q2,X64983	OR10A7,OR10G2,OR10G3,OR10G7,OR10J1,OR10J3,OR11H4,OR11H6,OR13C5,OR13C8,OR13C9,OR13D1,OR13F1,OR13H1,OR1D4,OR1Q1,OR1S2,OR2A9P,OR2A9P,OR2AT4,OR2C1,OR2K2,OR2S2,OR4B1,OR4D11,OR4E2,OR51D1,OR51E2,OR51F1,OR51F2,OR51I2,OR51L1,OR51M1,OR51Q1,OR51S1,OR51T1,OR51V1,OR52B2,OR52D1,OR52E2,OR52E4,OR52H1,OR52I2,OR52K1,OR52K2,OR52R1,OR52W1,OR56A1,OR56B4,OR5AK2,OR6K3,OR6S1,OR7C2,OR8B12,OR8B2,OR8B4,OR8B8,OR8D4,OR8S1,OR…
GO Molecular Function	drug binding	8.9656e-09	3.18383e-06	1.63306	80.83	132	635	40	60	71	ACR,ADRB1,ADRB2,CHKA,CHRFAM7A,CHRM1,CHRM2,CHRM3,CHRNA7,DHFR,DRD1,DRD2,FABP1,FKBP1A,FKBP4,FKBP5,FNTA,GABRA1,GABRA6,GRIK1,HRH3,HTR1B,HTR2A,HTR2B,HTR2C,HTT,NFATC1,NP,P2RX4,PDE3B,PGGT1B,PPARA,PPARG,PPID,PPIG,PPIH,PYGB,PYGL,SLC6A3,SLC6A4	ACR,ADRB1,ADRB2,ALB,CHKA,CHRFAM7A,CHRM1,CHRM2,CHRM3,CHRNA7,CNR1,DHFR,DONSON,DRD1,DRD2,DRD3,DRD5,FABP1,FKBP1A,FKBP1B,FKBP4,FKBP5,FKBP6,FNTA,FNTB,GABRA1,GABRA6,GRIK1,HRH3,HTR1A,HTR1B,HTR2A,HTR2B,HTR2C,HTT,MTOR,NFATC1,NKTR,NP,NR1I2,P2RX4,PDE3B,PDE4C,PGGT1B,PPARA,PPARD,PPARG,PPIC,PPID,PPIF,PPIG,PPIH,PYGB,PYGL,PYGM,SIGMAR1,SLC6A3,SLC6A4,SRP54,TLR7
GO Molecular Function	transferase activity, transferring acyl groups	2.01574e-08	5.66082e-06	1.44751	147.149	213	1156	84	128	214	A2LD1,ABHD5,ACLY,ACSM4,AGPAT4,AGPAT5,AGPAT9,ARD1B,ATE1,AUP1,C14orf147,C3orf57,C6orf140,CDYL,CLOCK,CREBBP,CSRP2BP,DBT,DGAT2,ELOVL6,ELP3,ELP4,EP300,EPC1,ESCO1,F13A1,GGCT,GGTLC1,GPAM,HADHA,HHAT,HMGCS1,HMGCS2,HRASLS5,LASS3,LASS6,LCAT,LCLAT1,LPCAT1,LPCAT2,LPCAT3,LPCAT4,LPGAT1,MBOAT1,MBOAT2,MBOAT4,MOGAT3,MYST2,MYST3,MYST4,NARG1,NARG1L,NAT2,NAT5,NAT8L,NCOA1,NCOA3,NMT2,OXSM,PDHX,QPCT,SAP130,SLC27A3,SPTLC…	A2LD1,ABHD5,ACAA2,ACLY,ACSM4,AGPAT1,AGPAT2,AGPAT4,AGPAT5,AGPAT6,AGPAT9,ALAS2,ARD1B,ATE1,AUP1,BAAT,C14orf147,C3orf57,C6orf140,CDYL,CHAT,CLOCK,CPT1A,CPT1B,CREBBP,CSRP2BP,DBT,DGAT2,DLST,ELOVL2,ELOVL6,ELP3,ELP4,EP300,EPC1,ESCO1,F13A1,GGCT,GGT7,GGTLC1,GNPNAT1,GPAM,GTF3C4,HADHA,HAT1,HHAT,HMGCS1,HMGCS2,HRASLS5,ING3,KAT2B,LASS1,LASS2,LASS3,LASS5,LASS6,LCAT,LCLAT1,LIPT2,LPCAT1,LPCAT2,LPCAT3,LPCAT4,LPGAT1,…
GO Molecular Function	peptidase activity	3.93566e-08	1.02668e-05	1.21707	554.609	675	4357	239	368	594	ABHD10,ABHD5,ACR,ADAM12,ADAM15,ADAM17,ADAM2,ADAM20,ADAM22,ADAM23,ADAM28,ADAM29,ADAM32,ADAM7,ADAMTS1,ADAMTS12,ADAMTS14,ADAMTS15,ADAMTS16,ADAMTS17,ADAMTS18,ADAMTS19,ADAMTS2,ADAMTS20,ADAMTS3,ADAMTS5,ADAMTS6,ADAMTS7,ADAMTS9,ADAMTSL1,ADAMTSL3,AFG3L2,AGBL1,AGBL2,AGBL3,AGBL4,AGBL5,AGTPBP1,APEH,APP,ATG4A,ATG4C,ATG4D,ATXN3L,BACE2,BRCC3,C1S,C6orf103,C9orf3,CAPN10,CAPN12,CAPN13,CAPN14,CAPN3,CAPN8,CAPN9,CAPN…	ABHD10,ABHD5,ACR,ADAM10,ADAM11,ADAM12,ADAM15,ADAM17,ADAM19,ADAM2,ADAM20,ADAM22,ADAM23,ADAM28,ADAM29,ADAM30,ADAM32,ADAM7,ADAM9,ADAMTS1,ADAMTS12,ADAMTS13,ADAMTS14,ADAMTS15,ADAMTS16,ADAMTS17,ADAMTS18,ADAMTS19,ADAMTS2,ADAMTS20,ADAMTS3,ADAMTS4,ADAMTS5,ADAMTS6,ADAMTS7,ADAMTS8,ADAMTS9,ADAMTSL1,ADAMTSL2,ADAMTSL3,ADAMTSL4,AEBP1,AFG3L2,AGBL1,AGBL2,AGBL3,AGBL4,AGBL5,AGTPBP1,AMZ1,ANPEP,APEH,APH1B,APP,ASPRV1,…
GO Molecular Function	isomerase activity	4.40082e-08	1.12146e-05	1.55821	92.4135	144	726	51	81	145	AIP,DCT,DKC1,DSEL,EHHADH,ERP44,FKBP11,FKBP1A,FKBP4,FKBP5,GALM,GLCE,GNPDA2,GPI,GSTZ1,HSD17B4,HYI,IDI1,ITPK1,LOC402644,MUT,NAF1,PDIA3P,PDIA5,PDIA6,PECI,PGM1,PGM2,PGM2L1,PGM3,PGM5,PIN1,PPIAL4A,PPIAL4B,PPID,PPIG,PPIH,PPIL2,PPP2R4,PTGIS,RANBP2,RPE,RPE65,SDCCAG10,TBXAS1,TMX3,TOP1,TOP2B,TOP3B,TRUB1,TXNDC5	ACADM,AIP,BPGM,DCT,DKC1,DSE,DSEL,EHHADH,ERP29,ERP44,FKBP10,FKBP11,FKBP14,FKBP1A,FKBP1B,FKBP4,FKBP5,FKBP6,FKBP8,FKBP9,GALM,GLCE,GNPDA1,GNPDA2,GPI,GSTZ1,HPGDS,HSD17B4,HYI,IDI1,ISYNA1,ITPK1,LOC402644,LOC729020,MPI,MUT,NAF1,NKTR,PBLD,PDIA3P,PDIA4,PDIA5,PDIA6,PECI,PGM1,PGM2,PGM2L1,PGM3,PGM5,PIN1,PIN4,PPIAL4A,PPIAL4A,PPIAL4B,PPIB,PPIC,PPID,PPIF,PPIG,PPIH,PPIL1,PPIL2,PPP2R4,PTGES,PTGIS,PUS7,PUS7L,RANBP2…
GO Molecular Function	nucleoside-diphosphatase activity	7.39892e-08	1.74042e-05	5.10639	2.54583	13	20	5	6	10	CANT1,ENTPD1,ENTPD3,ENTPD6,NUDT5	CANT1,ENTPD1,ENTPD3,ENTPD5,ENTPD6,NUDT5
GO Molecular Function	G-protein coupled amine receptor activity	1.19427e-07	2.65065e-05	1.58914	78.0296	124	613	26	36	40	ADRA1A,ADRA1B,ADRA1D,ADRA2A,ADRA2C,ADRB1,ADRB2,CHRM1,CHRM2,CHRM3,CHRM5,DRD1,DRD2,HRH1,HRH2,HRH3,HRH4,HTR1B,HTR1F,HTR2A,HTR2B,HTR2C,HTR4,HTR5A,HTR7,ZNF219	ADRA1A,ADRA1B,ADRA1D,ADRA2A,ADRA2B,ADRA2C,ADRB1,ADRB2,CHRM1,CHRM2,CHRM3,CHRM4,CHRM5,DRD1,DRD2,DRD3,DRD5,HRH1,HRH2,HRH3,HRH4,HTR1A,HTR1B,HTR1D,HTR1F,HTR2A,HTR2B,HTR2C,HTR3A,HTR3B,HTR4,HTR5A,HTR6,HTR7,WASF2,ZNF219
GO Molecular Function	oxidoreductase activity, oxidizing metal ions	3.68235e-07	7.18749e-05	3.1424	7.00103	22	55	7	7	9	CP,CYB561,CYBRD1,FRRS1,FTMT,MTRR,STEAP3	CP,CYB561,CYBRD1,FRRS1,FTMT,MTRR,STEAP3
GO Molecular Function	ATPase activity	4.29748e-07	8.07325e-05	1.26669	316.574	401	2487	141	230	339	ABCA12,ABCA13,ABCA3,ABCA4,ABCA5,ABCB1,ABCB5,ABCC1,ABCC3,ABCC4,ABCC5,ABCD2,ABCE1,ABCG1,ACTC1,ASCC3,ATF7IP,ATP10A,ATP10B,ATP11A,ATP11B,ATP11C,ATP13A3,ATP1A1,ATP1A3,ATP1B1,ATP2A1,ATP2B1,ATP2B2,ATP2B3,ATP4A,ATP5H,ATP5J,ATP6V0C,ATP6V0E1,ATP6V0E2,ATP6V1A,ATP6V1C1,ATP6V1E1,ATP6V1H,ATP8A1,ATP8A2,ATP8B4,ATP9B,BLM,BPTF,BRIP1,C3orf26,C9orf102,CCNH,CHD1,CHD5,CHD6,CRBN,DDX1,DDX10,DDX11,DDX12,DDX17,DDX18,DDX19…	ABCA1,ABCA12,ABCA13,ABCA3,ABCA4,ABCA5,ABCB1,ABCB10,ABCB4,ABCB5,ABCB9,ABCC1,ABCC12,ABCC13,ABCC2,ABCC3,ABCC4,ABCC5,ABCC6,ABCC8,ABCD1,ABCD2,ABCD3,ABCE1,ABCF2,ABCG1,ABCG4,ABCG5,ABCG8,ACIN1,ACTC1,ASCC3,ATAD2,ATF7IP,ATP10A,ATP10B,ATP11A,ATP11B,ATP11C,ATP13A3,ATP13A4,ATP13A5,ATP1A1,ATP1A2,ATP1A3,ATP1B1,ATP1B2,ATP1B3,ATP1B4,ATP2A1,ATP2A2,ATP2A3,ATP2B1,ATP2B2,ATP2B3,ATP2B4,ATP2C1,ATP4A,ATP5H,ATP5J,ATP5L,A…
GO Molecular Function	guanyl ribonucleotide binding	2.19566e-06	0.000298409	1.22561	380.219	466	2987	160	270	397	ADSS,AGAP1,AGAP2,AGAP3,AK3L1,ARF3,ARF6,ARHGAP5,ARL13A,ARL13B,ARL14,ARL4A,ARL4C,ARL4D,ARL5A,ARL5B,ARL6,ARL8B,ARL9,ATL1,ATL2,AX746903,BMS1,C1orf89,CNGA3,CNGB3,DIRAS2,DNAJC27,DNM1P33,DNM2,DNM3,DOCK1,DOCK10,DOCK11,DOCK2,DOCK3,DOCK5,DOCK7,DOCK8,DOCK9,DRG2,EEFSEC,EGLN2,EHD1,EIF5B,ERCC3,FKBP4,GCH1,GEM,GLUD1,GLUD2,GMPPA,GMPPB,GNA12,GNA14,GNAI1,GNAI2,GNAI3,GNAL,GNAO1,GNAS,GNL3L,GPN3,GRLF1,GTPBP4,GUCY1A2,G…	ADSS,AGAP1,AGAP2,AGAP3,AK3L1,ARF3,ARF6,ARHGAP5,ARL13A,ARL13B,ARL14,ARL17,ARL3,ARL4A,ARL4C,ARL4D,ARL5A,ARL5B,ARL6,ARL8B,ARL9,ATL1,ATL2,ATL3,AX746903,BMS1,C1orf89,CDC42,CNGA3,CNGB3,DIRAS2,DIRAS3,DNAJC27,DNM1,DNM1L,DNM1P33,DNM2,DNM3,DOCK1,DOCK10,DOCK11,DOCK2,DOCK3,DOCK4,DOCK5,DOCK6,DOCK7,DOCK8,DOCK9,DRG1,DRG2,EEFSEC,EFTUD1,EFTUD2,EGLN2,EHD1,EHD3,EHD4,EIF2B2,EIF2S3,EIF5,EIF5B,ERAL1,ERCC3,FKBP4,GCH1,G…
GO Molecular Function	GTPase binding	3.67241e-06	0.000455271	1.37981	134.802	186	1059	63	87	113	ALS2,ANXA2,ARHGEF2,BIN1,CCDC64,CDC42EP4,CIT,CYFIP1,DOCK1,DOCK10,DOCK11,DOCK2,DOCK3,DOCK5,DOCK7,DOCK8,DOCK9,ECT2,ERC1,EXOC2,EXPH5,FER,FGD2,FGD4,FGD5,GGA3,GRASP,IPO5,IPO8,KCTD13,MAPKAP1,MLPH,MYO5B,MYO9B,MYRIP,NOX1,PAK3,PEX5L,PKN1,RAB11FIP4,RAB3GAP1,RALBP1,RANBP1,RANBP2,RANBP3,RANBP9,RAP1GAP,RAPGEF4,RASA1,RASGRP3,RGL3,RHOH,RIMS1,RIMS2,RIN3,ROCK1,RPH3A,SGSM3,SLC6A4,SPHK2,SYTL2,SYTL4,WDR44	ABCA1,ALS2,ANXA2,ARHGEF2,BIN1,CCDC64,CDC42BPB,CDC42EP4,CDC42EP5,CIT,CYFIP1,DENND5A,DMXL2,DOCK1,DOCK10,DOCK11,DOCK2,DOCK3,DOCK4,DOCK5,DOCK6,DOCK7,DOCK8,DOCK9,ECT2,ERC1,EXOC2,EXPH5,FER,FGD1,FGD2,FGD4,FGD5,FGD6,FLNA,GGA3,GIT1,GOLGA5,GRASP,IPO5,IPO8,KCTD13,MAP2K1,MAP3K11,MAPKAP1,MLPH,MYO5B,MYO9B,MYRIP,NOX1,PAK3,PEX5L,PKN1,PLCE1,RAB11FIP4,RAB3GAP1,RAB3IP,RALBP1,RANBP1,RANBP10,RANBP2,RANBP3,RANBP9,RAP1…
GO Molecular Function	profilin binding	4.51244e-06	0.000534146	2.84441	7.3829	21	58	5	6	6	DBN1,EVL,PCLO,RHOQ,VASP	DBN1,EVL,PCLO,RHOQ,VASP,WIPF1
GO Molecular Function	mismatched DNA binding	7.99524e-06	0.000846311	3.78251	3.43687	13	27	5	8	18	MLH1,MSH5,MSH6,PCNA,PMS2L3	LOC401379,MLH1,MSH4,MSH5,MSH6,PCNA,PMS2L3,TDG
GO Molecular Function	small conjugating protein ligase activity	1.28489e-05	0.00124734	1.2758	218.687	279	1718	98	153	210	AKTIP,AMFR,ANAPC4,BCOR,BIRC6,CNOT4,CUL3,DTL,FBXL2,FBXL5,FBXL7,FBXO11,FBXO21,FBXO3,FBXO9,FBXW11,FEM1B,G2E3,HECTD1,HERC2,HERC2P3,HUWE1,ITCH,KCTD13,KIAA0776,KLHL13,KLHL21,LNX1,MALT1,MAP3K1,MDM2,MIB1,MUL1,MYLIP,NEDD4,NEDD4L,PARK2,PDZRN3,PELI1,PIAS1,PPIL2,PRPF19,RBBP6,RBX1,RING1,RNF128,RNF13,RNF130,RNF135,RNF144B,RNF168,RNF182,RNF20,RNF217,RNF220,RNF4,RNF5,RNF5,RNF7,SIAH1,SIAH2,SKP1,SKP2,SMURF1,TRIM32…	AKTIP,AMFR,ANAPC4,ANAPC5,ARIH1,BARD1,BCOR,BIRC3,BIRC6,BRCA1,CBL,CBLL1,CBX8,CDC23,CNOT4,CUL3,DTL,FBXL2,FBXL21,FBXL3,FBXL5,FBXL7,FBXO11,FBXO2,FBXO21,FBXO3,FBXO4,FBXO7,FBXO9,FBXW11,FBXW2,FEM1B,G2E3,HECTD1,HERC2,HERC2P3,HUWE1,ITCH,KCTD10,KCTD13,KIAA0776,KLHL13,KLHL20,KLHL21,LMO7,LNX1,MALT1,MAP3K1,MDM2,MIB1,MIB2,MUL1,MYLIP,NEDD4,NEDD4L,PARK2,PDZRN3,PELI1,PIAS1,PIAS2,PPIL2,PRPF19,RAG1,RBBP6,RBX1,RCHY1,…
GO Molecular Function	neurotransmitter binding	1.90527e-05	0.00168064	1.36107	125.637	171	987	37	62	79	CCKAR,CHRFAM7A,CHRM1,CHRM2,CHRM3,CHRM5,CHRNA1,CHRNA4,CHRNA7,CHRNB2,CHRNB3,GABRA2,GABRA3,GABRA6,GABRG2,GALR1,GLRA3,GPR139,GPR83,GRIN2A,GRIN2B,GRIN3A,HCRTR2,HTR7,NMUR2,NPY1R,NPY2R,NPY5R,PRLHR,PROKR2,SLC6A11,SLC6A13,SORCS1,SORCS2,SORCS3,TACR1,TACR3	ACHE,ANXA9,BRS3,CCKAR,CCKBR,CHRFAM7A,CHRM1,CHRM2,CHRM3,CHRM4,CHRM5,CHRNA1,CHRNA2,CHRNA4,CHRNA5,CHRNA6,CHRNA7,CHRNB2,CHRNB3,CHRNB4,CHRND,CHRNG,GABRA2,GABRA3,GABRA6,GABRG2,GALR1,GALR3,GLRA3,GPR139,GPR83,GRIN2A,GRIN2B,GRIN2D,GRIN3A,GRPR,HCRTR2,HTR7,IDE,NMBR,NMUR1,NMUR2,NPFFR1,NPY1R,NPY2R,NPY5R,NPY6R,NTSR1,PRLHR,PROKR1,PROKR2,QRFPR,SLC6A11,SLC6A13,SORCS1,SORCS2,SORCS3,SSTR1,SSTR2,SSTR4,TACR1,TACR3
GO Molecular Function	MHC protein binding	2.57591e-05	0.00217463	3.928	2.80041	11	22	7	9	24	CD4,CD74,CLEC7A,ROS1,TCRB,TRA,TRA@	CD4,CD74,CLEC7A,DERL1,LAG3,ROS1,TCRB,TRA,TRA@
GO Molecular Function	peptide antigen binding	4.29388e-05	0.00324654	4.41899	2.03666	9	16	5	7	20	DHCR24,MAML1,TCRB,TRA,TRA@	DHCR24,MAML1,SLC7A8,SLC7A9,TCRB,TRA,TRA@
GO Molecular Function	tetrapyrrole binding	5.97624e-05	0.00420652	1.40569	88.2129	124	693	39	68	130	AMBP,CAT,CUBN,CYB5A,CYB5B,CYB5R4,CYCS,CYP26A1,CYP26B1,CYP26C1,CYP2J2,CYP2R1,CYP2U1,CYP39A1,CYP46A1,CYP7A1,CYP7B1,CYP8B1,DOCK1,DOCK2,FA2H,FADS2,FADS3,GUCY1A2,GUCY1A3,HERC2,LMBRD1,MTR,MUT,NGB,NOS1,NOS2,PGRMC1,PGRMC2,PTGIS,PTGS1,PXDNL,SDHC,TBXAS1	AMBP,CAT,CUBN,CYB5A,CYB5B,CYB5R4,CYCS,CYGB,CYP11A1,CYP17A1,CYP19A1,CYP1B1,CYP24A1,CYP26A1,CYP26B1,CYP26C1,CYP27B1,CYP27C1,CYP2A6,CYP2D6,CYP2J2,CYP2R1,CYP2U1,CYP39A1,CYP46A1,CYP4F22,CYP51A1,CYP7A1,CYP7B1,CYP8B1,DOCK1,DOCK2,DUOX1,EIF2AK1,FA2H,FADS2,FADS3,FECH,GUCY1A2,GUCY1A3,GUCY1B2,GUCY1B3,HBB,HBD,HBE1,HBG1,HEBP1,HERC2,IDO2,LMBRD1,MB,MTR,MUT,NENF,NGB,NOS1,NOS2,NOS3,NOX4,NOX5,PGRMC1,PGRMC2,PTGIS,PT…
GO Molecular Function	oxidoreductase activity, acting on NADH or NADPH, heme protein as acceptor	7.5412e-05	0.00504976	3.36685	3.56416	12	28	6	6	8	CYB561,CYB5R2,CYB5R3,CYB5R4,NQO1,POR	CYB561,CYB5R2,CYB5R3,CYB5R4,NQO1,POR
GO Molecular Function	antigen binding	0.000118811	0.00713163	2.61866	6.49186	17	51	10	15	43	CREBBP,DHCR24,EP300,FCN1,FCN2,IGJ,MAML1,TCRB,TRA,TRA@	CREBBP,DHCR24,EP300,FCN1,FCN2,IGJ,IL7R,LAG3,MAML1,SLAMF1,SLC7A8,SLC7A9,TCRB,TRA,TRA@
GO Molecular Function	nucleotidyltransferase activity	0.000157637	0.00900087	1.37648	89.3585	123	702	47	70	124	AK097143,AK098727,AK127270,CHRAC1,CTDP1,DKC1,ESCO1,FICD,GMPPA,GMPPB,GPHN,MTPAP,NMNAT3,OAS1,PAPD4,PAPOLA,PAPSS2,PCYT1B,POLA2,POLD4,POLE4,POLG,POLI,POLK,POLN,POLR1B,POLR1D,POLR2A,POLR2B,POLR2C,POLR2D,POLR2I,POLR2J2,POLR3B,POLS,PRIM2,REV1,RNGTT,TERT,TNNI3K,TRNT1,TUT1,UGP2,UPLP,USP14,ZCCHC11,ZCCHC6	AK097143,AK098727,AK127270,CDS1,CDS2,CHRAC1,CTDP1,DKC1,DNTT,EIF2B3,ESCO1,FICD,GMPPA,GMPPB,GPHN,ISPD,MOCS3,MTPAP,NMNAT1,NMNAT2,NMNAT3,OAS1,PAPD4,PAPD5,PAPOLA,PAPOLG,PAPSS1,PAPSS2,PCYT1B,PNPT1,POLA1,POLA2,POLD3,POLD4,POLE2,POLE4,POLG,POLI,POLK,POLL,POLN,POLR1A,POLR1B,POLR1D,POLR2A,POLR2B,POLR2C,POLR2D,POLR2F,POLR2I,POLR2J2,POLR3A,POLR3B,POLR3E,POLR3F,POLS,PRIM2,REV1,REV3L,RNGTT,TERT,TNNI3K,TRNT1,TU…
Pathway Commons	Abortive elongation of HIV-1 transcript in the absence of Tat	3.26916e-08	8.65117e-06	3.4092	6.74644	23	53	13	19	34	CTDP1,GTF2F2,NCBP1,NCBP2,POLR2A,POLR2B,POLR2C,POLR2D,POLR2I,SUPT16H,SUPT5H,TH1L,WHSC2	CCNT2,CTDP1,ELL,GTF2F1,GTF2F2,NCBP1,NCBP2,POLR2A,POLR2B,POLR2C,POLR2D,POLR2F,POLR2I,SUPT16H,SUPT4H1,SUPT5H,TCEB3,TH1L,WHSC2
Pathway Commons	superpathway of cholesterol biosynthesis	5.59784e-08	1.38794e-05	2.76745	11.2016	31	88	12	14	25	DHCR24,DHCR7,HMGCR,HMGCS1,HMGCS2,HSD17B7,IDI1,LBR,PMVK,SC4MOL,SC5DL,SQLE	CYP51A1,DHCR24,DHCR7,HMGCR,HMGCS1,HMGCS2,HSD17B7,IDI1,LBR,MVK,PMVK,SC4MOL,SC5DL,SQLE
Pathway Commons	Organic cation/anion/zwitterion transport	1.19032e-07	2.65259e-05	3.82183	4.70978	18	37	6	6	9	SLC22A11,SLC22A12,SLC22A16,SLC22A2,SLC22A3,SLC22A6	SLC22A11,SLC22A12,SLC22A16,SLC22A2,SLC22A3,SLC22A6
Pathway Commons	Late Phase of HIV Life Cycle	8.52737e-07	0.000137646	1.77314	40.6059	72	319	40	60	94	CCNH,CTDP1,ERCC3,GTF2A1,GTF2B,GTF2E1,GTF2E2,GTF2F2,KPNB1,NCBP1,NCBP2,NUP133,NUP155,NUP210,NUP214,NUP35,NUP50,NUP85,NUP88,NUP93,POLR2A,POLR2B,POLR2C,POLR2D,POLR2I,RAN,RANBP1,RANBP2,RCC1,RNGTT,RNMT,SEH1L,SUPT16H,SUPT5H,TAF4,TAF4B,TAF5,TH1L,WHSC2,XPO1	AAAS,CCNH,CCNT2,CTDP1,ELL,ERCC3,GTF2A1,GTF2B,GTF2E1,GTF2E2,GTF2F1,GTF2F2,GTF2H1,KPNB1,MNAT1,NCBP1,NCBP2,NTRK1,NUP107,NUP133,NUP153,NUP155,NUP160,NUP205,NUP210,NUP214,NUP35,NUP37,NUP50,NUP54,NUP85,NUP88,NUP93,NUPL2,POLR2A,POLR2B,POLR2C,POLR2D,POLR2F,POLR2I,RAN,RANBP1,RANBP2,RANGAP1,RCC1,RNGTT,RNMT,SEH1L,SUPT16H,SUPT4H1,SUPT5H,TAF12,TAF13,TAF4,TAF4B,TAF5,TCEB3,TH1L,WHSC2,XPO1
Pathway Commons	fatty acid beta-oxidation I	1.61739e-06	0.000235518	2.65267	9.80144	26	77	6	11	19	ACSBG2,ACSL6,EHHADH,HADHA,HSD17B10,PECI	ACAA2,ACADM,ACSBG2,ACSL1,ACSL4,ACSL6,EHHADH,HADH,HADHA,HSD17B10,PECI
Pathway Commons	1D-myo-inositol hexakisphosphate biosynthesis II (mammalian)	1.87013e-06	0.000262596	2.82325	8.14665	23	64	9	11	15	INPP5J,IPMK,IPPK,ITPK1,ITPKB,ITPKC,OCRL,SYNJ1,SYNJ2	INPP5J,INPPL1,IPMK,IPPK,ITPK1,ITPKA,ITPKB,ITPKC,OCRL,SYNJ1,SYNJ2
Pathway Commons	Release of eIF4E	2.75133e-06	0.000361435	2.40489	12.4746	30	98	8	18	24	AKT2,EIF4E,EIF4EBP1,PRKAA2,PRKAG2,RHEB,RPTOR,TSC1	AKT2,CAB39L,EEF2K,EIF4B,EIF4E,EIF4EBP1,EIF4G1,MLXIPL,MTOR,PPM1A,PRKAA2,PRKAB2,PRKAG2,RHEB,RPS6,RPS6KB1,RPTOR,TSC1
Pathway Commons	AndrogenReceptor	9.09451e-06	0.000942729	1.46131	85.5398	125	672	35	48	68	CCND1,CCNE1,CCNH,CDC2,CDC37,CREBBP,CTNNA2,EP300,ESR1,ETV5,FHL2,GTF2F2,IL6ST,JUN,MDM2,MYST2,NCOA1,NCOA2,NCOA3,NR5A1,NSD1,PATZ1,PIAS1,PNRC1,POU5F1,RAN,RANBP9,RB1,RNF4,RUNX1,RUNX2,SPDEF,SVIL,UBE3A,UXT	BRCA1,CCND1,CCNE1,CCNH,CDC2,CDC37,CREBBP,CTNNA2,EP300,ESR1,ETV5,FHL2,GTF2F1,GTF2F2,GTF2H1,IL6ST,JUN,KAT2B,MDM2,MNAT1,MYST2,NCOA1,NCOA2,NCOA3,NR2C2,NR5A1,NSD1,PATZ1,PIAS1,PNRC1,POU5F1,PRPF6,RAN,RANBP9,RB1,RCHY1,RELA,RNF4,RUNX1,RUNX2,SENP1,SIN3A,SMAD4,SPDEF,STAT3,SVIL,UBE3A,UXT
Pathway Commons	Activation of PKB	9.14328e-06	0.000946003	3.54787	3.94603	14	31	5	5	6	AKT2,PDE3B,PDPK1,THEM4,TSC1	AKT2,PDE3B,PDPK1,THEM4,TSC1
Pathway Commons	Deadenylation of mRNA	1.13659e-05	0.00112723	2.00153	19.9847	40	157	19	29	43	C2orf29,CNOT1,CNOT2,CNOT4,CNOT6,CNOT7,DCP1B,DIS3,EDC3,EIF4E,EXOSC2,EXOSC7,EXOSC9,LSM5,LSM6,PAN3,PARN,RQCD1,XRN1	C2orf29,CNOT1,CNOT2,CNOT4,CNOT6,CNOT7,DCP1A,DCP1B,DCP2,DCPS,DIS3,EDC3,EIF4A1,EIF4B,EIF4E,EIF4G1,EXOSC2,EXOSC7,EXOSC9,LSM3,LSM4,LSM5,LSM6,PABPC1,PAN3,PARN,RQCD1,TNKS1BP1,XRN1
Pathway Commons	Alpha-oxidation of phytanate	2.11929e-05	0.00183128	4.71359	1.90937	9	15	4	4	12	ACOX2,ACOX3,HSD17B4,SLC25A17	ACOX2,ACOX3,HSD17B4,SLC25A17
Pathway Commons	Pentose phosphate pathway (hexose monophosphate shunt)	3.79564e-05	0.00293432	1.66236	37.2964	62	293	23	40	67	ACLY,ADSL,ATP5H,ATP5J,CAT,DGAT2,GDA,GMPS,LPIN1,NP,PAICS,PFAS,PFKFB1,PGD,PGLS,PPAT,RAPGEF4,RPE,RRM1,SNAP25,STX1A,TXN,UMPS	ABCC8,ACLY,ADSL,AGPAT1,AGPAT2,ATIC,ATP5G1,ATP5H,ATP5J,ATP5L,CAT,CMPK1,DGAT2,DONSON,GDA,GLRX,GMPS,INS-IGF2,LPIN1,MLXIPL,NP,NT5C2,PAICS,PFAS,PFKFB1,PGD,PGLS,PPA1,PPAT,PRKACB,PRPS1,RAPGEF3,RAPGEF4,RPE,RRM1,RRM2,SNAP25,STX1A,TXN,UMPS
Pathway Commons	TNF alpha/NF-kB	6.41876e-05	0.00447792	1.34602	118.126	159	928	60	98	149	AKT2,AZI2,BCL7A,CASP3,CDC37,CDKL3,COMMD1,CREBBP,CSNK2A1,CSNK2A2,CUL1,DAP,FADD,FAF1,FBXW11,FKBP5,GAB1,GLG1,GNB2L1,HDAC2,HSPB1,IQGAP2,KCNQ1,MAP3K14,MAP3K2,MAP3K7IP1,MAP3K7IP2,MAP3K7IP3,MARK2,NFKB1,NFKBIA,NSMAF,PAPOLA,PEG3,PFDN2,PKN1,POLR1B,POLR1D,PRKACA,PSMD1,PSMD12,PSMD6,PSMD7,PTPN11,RASAL2,RELB,RIPK2,RPL30,SKP1,SRC,TBK1,TNFRSF11A,TNIP2,TRAF3,TRAF5,UNC5CL,YWHAB,YWHAG,YWHAQ,ZFAND5	ACTL6A,AKT2,ALPL,AZI2,BCL7A,BIRC3,CASP3,CASP7,CDC37,CDKL3,COMMD1,CREBBP,CSNK2A1,CSNK2A2,CUL1,CYLD,DAP,DPF2,FADD,FAF1,FBXW11,FKBP5,G3BP2,GAB1,GLG1,GNB2L1,GSK3B,HDAC2,HDAC6,HSPB1,IKBKE,IQGAP2,KCNQ1,KIAA1967,KPNA2,KPNA3,LRPPRC,MAP3K14,MAP3K2,MAP3K3,MAP3K7IP1,MAP3K7IP2,MAP3K7IP3,MAP3K8,MARK2,MCC,MTIF2,NFKB1,NFKB2,NFKBIA,NFKBIZ,NKIRAS1,NR2C2,NSMAF,PAPOLA,PEBP1,PEG3,PFDN2,PKN1,POLR1A,POLR1B,POLR1D,PPP1…
Pathway Commons	Mitotic Prometaphase	0.000157262	0.00898876	1.37099	91.9044	126	722	43	60	85	AHCTF1,BUB1,BUB3,CENPC1,CENPE,CENPI,CENPN,CENPT,CKAP5,CLASP1,CLASP2,CLIP1,CORT,DSN1,INCENP,ITGB3BP,KIF18A,KIF2A,KIF2B,KNTC1,MAD2L1,MLF1IP,NDC80,NDEL1,NUDC,NUF2,NUP133,NUP85,PAFAH1B1,PMF1,PPP1CC,RAD21,RANBP2,RCC2,SEC13,SEH1L,SGOL1,SKA1,SPC25,STAG2,TAOK1,XPO1,ZWINT	AHCTF1,BUB1,BUB3,CCDC99,CDCA8,CENPC1,CENPE,CENPI,CENPM,CENPN,CENPT,CKAP5,CLASP1,CLASP2,CLIP1,CORT,DSN1,ERCC6L,INCENP,ITGB3BP,KIF18A,KIF2A,KIF2B,KNTC1,MAD2L1,MLF1IP,NDC80,NDE1,NDEL1,NUDC,NUF2,NUP107,NUP133,NUP160,NUP37,NUP85,PAFAH1B1,PLK1,PMF1,PPP1CC,RAD21,RANBP2,RANGAP1,RCC2,SEC13,SEH1L,SGOL1,SKA1,SKA2,SMC1A,SMC3,SPC24,SPC25,STAG1,STAG2,TAOK1,WEE1,XPO1,ZW10,ZWINT
Pathway Commons	mRNA Splicing - Minor Pathway	0.000166032	0.00940218	2.48084	7.25561	18	57	13	26	43	DDX23,GTF2F2,NCBP1,NCBP2,POLR2A,POLR2B,POLR2C,POLR2D,POLR2I,SFRS1,SFRS6,SNRNP40,TXNL4A	DDX23,EFTUD2,GTF2F1,GTF2F2,NCBP1,NCBP2,POLR2A,POLR2B,POLR2C,POLR2D,POLR2F,POLR2I,PRPF6,SF3B1,SF3B2,SF3B3,SF3B5,SFRS1,SFRS6,SFRS7,SNRNP200,SNRNP40,SNRPD1,SNRPE,SNRPF,TXNL4A
Mouse Phenotype	abnormal melanogenesis	1.32465e-19	1.45825e-15	5.1421	7.00103	36	55	5	6	7	ASIP,CNO,HPS6,LYST,OCA2	ASIP,CNO,HPS6,LYST,OCA2,TYR
Mouse Phenotype	abnormal hair follicle melanin granule distribution	5.77469e-13	8.82934e-10	3.76202	9.03769	34	71	5	5	5	ASIP,MLPH,MYO5A,OCA2,RXRA	ASIP,MLPH,MYO5A,OCA2,RXRA
Mouse Phenotype	abnormal circulating gastrin level	5.18132e-12	5.82031e-09	2.74422	18.5845	51	146	7	8	10	ATP4A,CPE,HRH2,KCNE2,KCNQ1,NKX6-3,SST	ATP4A,CCKBR,CPE,HRH2,KCNE2,KCNQ1,NKX6-3,SST
Mouse Phenotype	increased bone density	1.80053e-11	1.5985e-08	2.93746	14.6385	43	115	5	11	14	CAMK4,GALNT3,RGS10,SMURF1,THBS2	ALOX5,ALPL,CAMK4,GALNT3,GHRHR,GHRHR,RGS10,SMURF1,SOST,SPP1,THBS2
Mouse Phenotype	abnormal choroid melanin granule morphology	2.75357e-11	2.29643e-08	2.946	14.2566	42	112	6	7	7	ASIP,LYST,MLPH,MYO5A,OCA2,TYRP1	ASIP,LYST,MLPH,MYO5A,OCA2,TYR,TYRP1
Mouse Phenotype	increased vertical activity	3.73369e-11	2.97846e-08	1.959	50.0255	98	393	20	29	32	ADCYAP1,ADM,CHRNA4,CLOCK,DRD1,ESR1,FEZ1,GRIA1,HRH2,HTR2A,HTT,IMPA1,MECP2,OPRM1,RAD23B,RAI1,SLC6A3,SPTBN4,TMOD2,TOM1L2	ADCYAP1,ADM,CHRNA4,CLOCK,DKFZp686H12134,DRD1,DRD3,ESR1,FEZ1,GRIA1,HRH2,HTR2A,HTT,IMPA1,L1CAM,MECP2,NTSR1,OPRM1,PNPLA6,PPP3R1,PSAP,RAD23B,RAI1,SLC6A3,SMAD4,SPTBN4,SRR,TMOD2,TOM1L2
Mouse Phenotype	abnormal temporal memory	4.05238e-10	2.32349e-07	1.41184	214.613	303	1686	65	88	98	ABI2,ADCY8,ADCYAP1R1,ADD2,AMPH,APP,ARX,BDNF,C5orf13,CACNB3,CAMK4,CEBPD,CHRM3,CLIP2,CREB1,CREBBP,CREM,CTNND2,DRD1,EFNA3,EGR1,EHMT1,ENO2,EPHA6,FEZ1,FOS,GABRA5,GNAI1,GPR85,GRIK2,GRIN2A,GRIN2C,GRM1,GRM5,GRM7,HDAC2,JPH3,KALRN,KCNH3,KCNN2,KL,KLF9,KSR1,LHX8,MAP2,MAPK1,MAPT,MECP2,NPAS2,NPY2R,NRGN,NTRK2,PLAT,PRKCB,PTPRZ1,RAI1,RASGRF1,RYR3,SLC6A1,ST8SIA2,SYT4,TMOD2,TSC1,UBE3A,VDAC1	ABI2,ADCY8,ADCYAP1R1,ADD2,AMPH,APP,ARX,BDNF,C5orf13,CACNB3,CAMK2A,CAMK4,CEBPD,CHRM3,CLIP2,CREB1,CREBBP,CREM,CTNND2,DRD1,EFNA3,EGR1,EHMT1,EIF2AK4,ENO2,EPHA6,ESR2,FEZ1,FOS,GABRA5,GABRD,GIT1,GNAI1,GPR85,GRIK2,GRIN1,GRIN2A,GRIN2C,GRM1,GRM5,GRM7,GSK3B,HDAC2,IL6,JPH3,JPH4,KALRN,KCNH3,KCNN2,KL,KLF9,KSR1,LHX8,LMX1B,LRP8,MAP2,MAPK1,MAPT,MECP2,MMP9,NCSTN,NLGN3,NOS3,NPAS2,NPY2R,NRGN,NTRK2,PLAT,PRKCB,PSEN1,P…
Mouse Phenotype	arrest of male meiosis	4.81299e-10	2.70328e-07	1.64811	91.0133	150	715	43	57	85	ATM,BCL2L11,BIK,CCNB1IP1,CREM,DMC1,EHMT2,EIF4G3,GAL3ST1,GNRH1,GNRHR,GTSF1,HSF2,KL,LMNA,MAP7,MCPH1,MEI1,MLH1,MOV10L1,MSH5,PIWIL1,PIWIL4,PRDM9,PROKR2,SCMH1,SIAH1,SLC25A31,SMC1B,SPO11,STRA8,SUV39H1,SUV39H2,SYCE2,SYCP1,SYCP2,SYCP3,TDRD9,TEX11,TEX15,TSN,UBB,VRK1	ALPL,ATM,BCL2L11,BIK,BRCA1,CCNA1,CCNB1IP1,CDC7,CGA,CPEB1,CREM,DMC1,EHMT2,EIF4G3,FKBP6,GAL3ST1,GNRH1,GNRHR,GTSF1,HSF2,KL,LMNA,MAP7,MCPH1,MEI1,MLH1,MORC1,MOV10L1,MSH5,MYBL1,NR2C2,PIWIL1,PIWIL2,PIWIL4,PRDM9,PROKR2,SCMH1,SIAH1,SLC19A2,SLC25A31,SMC1B,SPO11,STRA8,SUV39H1,SUV39H2,SYCE2,SYCP1,SYCP2,SYCP3,TDRD9,TEX11,TEX15,TSN,UBB,UBC,UBR2,VRK1
Mouse Phenotype	decreased digestive secretion	7.12344e-10	3.73424e-07	2.13683	31.8228	68	250	10	11	12	CHRM1,CHRM3,CHRM5,CPE,FOXQ1,HRH2,KCNE2,PTGS1,SLC26A9,SYTL2	CHRM1,CHRM3,CHRM5,CPE,FOXQ1,HRH2,KCNE2,PRKG2,PTGS1,SLC26A9,SYTL2
Mouse Phenotype	abnormal digestive secretion	8.58298e-10	4.41526e-07	1.89698	48.498	92	381	20	25	32	ATP4A,CHRM1,CHRM3,CHRM5,CPE,FOXL1,FOXQ1,GPR39,HRH2,IGJ,KCNE2,KCNQ1,LASP1,PTGS1,SLC26A9,SLC4A2,SST,ST14,SYTL2,TFF2	ATP4A,CHRM1,CHRM3,CHRM5,CPE,FOXL1,FOXQ1,GPR39,GUCA2B,HOXA5,HRH2,IGJ,KCNE2,KCNQ1,LASP1,PRKG2,PTGS1,SLC26A9,SLC4A2,SLC9A2,SLC9A4,SST,ST14,SYTL2,TFF2
Mouse Phenotype	absent maternal crouching	5.34323e-09	2.08587e-06	2.64124	14.7658	39	116	4	4	4	ADCYAP1,GNAL,OXTR,PEG3	ADCYAP1,GNAL,OXTR,PEG3
Mouse Phenotype	abnormal cochlear OHC efferent innervation pattern	2.5245e-08	6.98272e-06	2.21357	23.0397	51	181	7	9	10	CHRNA10,FGFR3,GABRA5,GABRB2,GABRB3,GFI1,SLITRK6	CHRNA10,CHRNA9,FGFR3,GABRA5,GABRB2,GABRB3,GFI1,PSAP,SLITRK6
Mouse Phenotype	impaired behavioral response to xenobiotic	3.24208e-08	8.62096e-06	1.48364	123.345	183	969	43	62	69	A4GALT,ADCY5,ADORA2A,ADORA2A,ADRA1B,ADRA1D,APBA1,AQP4,BDNF,CACNA1B,CACNA1G,CACNA2D1,CACNB4,CALCA,CHRM2,CHRM5,CHRNA4,DBH,DRD1,DRD2,EHMT1,EHMT2,GABBR2,GABRA1,GABRA2,GABRB3,GABRG2,GRASP,GRM5,HTR2C,KCNK2,KIT,NPY1R,OPRD1,OPRK1,OPRL1,OPRM1,PARK2,PLAT,PLCL1,RPS6KA5,S100A10,TACR1	A4GALT,ADCY5,ADORA2A,ADORA2A,ADRA1B,ADRA1D,APBA1,AQP4,BDNF,CACNA1B,CACNA1G,CACNA2D1,CACNB4,CALCA,CD81,CHRM2,CHRM4,CHRM5,CHRNA4,CNR1,DAO,DBH,DLG4,DRD1,DRD2,EHMT1,EHMT2,GABBR1,GABBR2,GABRA1,GABRA2,GABRB3,GABRD,GABRG2,GNAZ,GRASP,GRIN1,GRM5,HTR2C,HTR6,KCNK2,KIT,LRRK2,NPY1R,NR1I2,OPRD1,OPRK1,OPRL1,OPRM1,PARK2,PLAT,PLCL1,PPP1R1B,RGS4,RPS6KA5,S100A10,SLC17A8,SLC18A2,SLC29A1,SLC6A9,TACR1,TH
Mouse Phenotype	increased liver weight	6.18826e-08	1.50053e-05	1.53998	96.105	148	755	38	59	75	ALMS1,ANGPTL3,ASIP,ATG7,CAPN10,CUL3,CYBRD1,DECR1,FABP2,FADS2,GHR,GNAS,GSTZ1,GTF2IRD1,HDAC3,HIP1,IGF1R,IGF2,IGFBP2,KIFAP3,KLF6,LEP,MAT1A,NCOA6,NDFIP1,NPY2R,OCA2,OTC,POR,PPARG,PPARGC1B,PREP,RICTOR,RUNX1,SC5DL,SOD2,STK4,XYLT2	ABCC2,ABCG5,AGPAT2,ALMS1,ANGPTL3,ASIP,ATG7,CAPN10,CUL3,CYBRD1,DECR1,DFNB31,FABP2,FADS2,FECH,G6PC,GHR,GNAS,GNAS,GPR12,GSTZ1,GTF2IRD1,HDAC3,HIP1,HNF1A,IGF1R,IGF2,IGFBP2,KIFAP3,KLF6,LDHA,LDLR,LEP,MAT1A,MLXIPL,MTTP,NCOA6,NDFIP1,NPY2R,NR1H3,OCA2,OTC,PCK1,POR,PPARG,PPARGC1B,PREP,RICTOR,RUNX1,SAV1,SC5DL,SLC13A1,SOD2,SPI1,STAT3,STK3,STK4,TXNIP,XYLT2
Mouse Phenotype	abnormal sleep pattern	3.37781e-07	6.66396e-05	1.70118	52.3168	89	411	24	34	37	ARNTL,CACNA1B,CACNA1G,CADPS2,CLOCK,DLGAP3,FGF2,FOS,FOSB,HCRTR2,KCNA2,KCNC2,LEP,MAOA,NOS1,NOS2,NPAS2,NPY2R,PER3,PRNP,SLC6A4,TPH2,TSHR,UBE3A	ARNTL,CACNA1B,CACNA1G,CADPS2,CLOCK,DLGAP3,FGF2,FOS,FOSB,GABBR1,GHRHR,GHRHR,HCRTR2,HOXB8,HPRT1,IL10,IL6,KCNA2,KCNC2,LEP,MAOA,MAP6,NOS1,NOS2,NPAS2,NPY2R,PER1,PER2,PER3,PRNP,SLC6A4,TPH2,TSHR,UBE3A
Mouse Phenotype	abnormal miniature inhibitory postsynaptic currents	4.05861e-07	7.67691e-05	2.3766	15.1477	36	119	5	6	6	CACNA1B,FGF7,GABRG2,NBEA,TRIM3	CACNA1B,FGF7,GABRG2,NBEA,SLC6A5,TRIM3
Mouse Phenotype	abnormal body temperature	5.54622e-07	9.78463e-05	1.33698	198.956	266	1563	68	107	142	ABCG1,ACSS1,ADCYAP1,ADK,ADRB1,ADRB2,ANGPTL6,APBA2,ATE1,ATOX1,B4GALT5,BRAF,CAMKK2,CAV1,CCKAR,CDKN1B,CHRM3,CLOCK,CPE,CRY1,DECR1,DGAT2,DRD1,DRD2,GHR,GPD2,GPX2,HRH3,HTR2C,HTR7,KCNC1,KCNC3,KDM3A,KL,LEP,MC5R,MECP2,NCOA3,NCOR2,NHLH2,NMU,NOX3,NR1H4,OTC,PARK2,PDYN,PMCH,PPARG,PPARGC1A,PPARGC1B,PRIMA1,PRLR,PRNP,PROKR2,PTPN1,PTPN11,RUNX2,RYR1,SLC2A2,SLC6A2,SLC6A4,SOD2,TACR1,TK2,TNFRSF11A,TNKS,TPH2,ULK2	ABCG1,ACADM,ACHE,ACSS1,ADCYAP1,ADK,ADORA1,ADORA2B,ADRB1,ADRB2,AGPAT2,ANGPTL6,APBA2,ARRB2,ATE1,ATOX1,B4GALT5,BRAF,BSX,CAMKK2,CAV1,CBL,CCKAR,CCKBR,CDKN1B,CHRM3,CLOCK,CPE,CPT1B,CRY1,CRY2,DECR1,DGAT2,DRD1,DRD2,GABBR1,GHR,GPD2,GPX2,GRK5,HIF1A,HRH3,HSPA1A,HTR1A,HTR2C,HTR7,IL10,IL1A,IL1B,IL1RN,IL6,KCNAB2,KCNC1,KCNC3,KDM3A,KL,LEP,MC5R,MECP2,MLXIPL,NCOA3,NCOR2,NHLH2,NMBR,NMU,NOS3,NOX3,NR1H4,NTSR1,OTC,PARK…
Mouse Phenotype	abnormal discrimination learning	8.38986e-07	0.000138264	1.92954	29.0224	56	228	13	17	19	ACSM4,C5orf13,CACNA1B,CACNB3,CAMKK2,ENO2,GRIA2,NEURL,NPTX2,PAH,RASGRF1,SPRED1,SYT4	ACSM4,C5orf13,CACNA1B,CACNB3,CAMKK2,ENO2,GRIA2,GRIN1,KCNAB1,NEURL,NF1,NPTX2,PAH,RASGRF1,SPRED1,SYT4,UBR1
Mouse Phenotype	abnormal type IV spiral ligament fibrocytes	8.41786e-07	0.0001379	2.13802	20.112	43	158	6	6	6	GABRA5,GABRB2,GABRB3,GRID1,OTOS,SLC4A7	GABRA5,GABRB2,GABRB3,GRID1,OTOS,SLC4A7
Mouse Phenotype	abnormal baroreceptor physiology	1.50357e-06	0.000220109	2.55776	10.9471	28	86	6	8	11	ADRA1B,AKAP10,AVPR1A,CACNA1B,CRY1,FGF2	ADRA1B,AKAP10,AVPR1A,CACNA1B,CRY1,CRY2,CYP19A1,FGF2
Mouse Phenotype	decreased brain weight	3.24775e-06	0.000411903	1.47026	91.1406	134	716	30	35	50	AKT2,AKT3,APP,ATR,ATXN1,BCL2L1,BDNF,CACNA2D2,CAV1,CIT,DEDD,DRD1,DYRK1A,ERCC6,HDAC2,LAMA2,LIG4,LPPR4,MAPT,MECP2,NBN,NRD1,OTX1,PDHA1,SFRP1,SHH,SLC2A1,SYN2,UBE3A,XPA	AKT2,AKT3,APP,ATR,ATXN1,BCL2L1,BDNF,CACNA2D2,CAV1,CIT,CKB,DEDD,DRD1,DYRK1A,ERCC6,HDAC2,LAMA2,LIG4,LPPR4,MAPT,MECP2,NBN,NDE1,NRD1,OTX1,PDHA1,SCN1A,SFRP1,SHH,SLC2A1,SPEN,SYN2,TG,UBE3A,XPA
Mouse Phenotype	greasy coat	1.94356e-05	0.00170894	2.39512	10.4379	25	82	5	6	11	CYP7A1,EDAR,FGF7,MECP2,ZDHHC21	CYP7A1,EDAR,FGF7,KRT71,MECP2,ZDHHC21
Mouse Phenotype	enhanced behavioral response to xenobiotic	5.88765e-05	0.00414947	1.41244	85.6671	121	673	33	47	53	ATP1A1,ATP1A3,CACNA1A,CACNA1B,CALCA,CHRNA4,CLCN3,CLOCK,DLGAP3,DRD2,EHMT2,FYN,GABRG2,HOMER1,HTR2C,KCNC1,KCNC3,LYST,NACC1,NCDN,NOS1,NR4A2,OPRM1,PNOC,POR,PPP1R14C,PPP1R9A,PRKAA2,RYR1,SCN8A,SLC6A1,SLC6A2,SLITRK5	ATP1A1,ATP1A3,BLOC1S3,CACNA1A,CACNA1B,CALCA,CHRM4,CHRNA4,CLCN3,CLOCK,DLG4,DLGAP3,DRD2,EHMT2,FYN,GABRG2,GNAZ,GRK6,HOMER1,HOMER2,HTR2C,HTR6,IL6,KCNC1,KCNC3,LYST,NACC1,NCDN,NOS1,NR4A2,OPRM1,PDE11A,PNOC,POR,PPP1R14C,PPP1R1B,PPP1R9A,PRKAA2,PRKAR2B,RYR1,SCN8A,SLC17A8,SLC18A2,SLC6A1,SLC6A2,SLITRK5,SOD1
Mouse Phenotype	small seminiferous tubules	7.18801e-05	0.0048906	1.36922	102.979	141	809	42	51	73	ADRA1B,B4GALT1,BCL2L11,BUB1,CDC2,CNOT7,CREM,CYP26B1,DICER1,EGR1,FSHB,FSHR,FYN,GALNT3,GJA1,GNRHR,HMGA1,HSF2,LHCGR,LIMK2,LMNA,MAP7,MOV10L1,NHLH2,NKD1,OCA2,PATZ1,PICK1,POU5F1,PPP1CC,PROKR2,RAD23B,RBP1,RNF17,ROR2,SNAI2,SPO11,SYCP1,SYCP2,SYCP3,UBB,WWOX	ADRA1B,ALPL,B4GALT1,BCL2L11,BUB1,CDC2,CGA,CNOT7,CREM,CYP26B1,DICER1,EGR1,EHD4,FSHB,FSHR,FYN,GALNT3,GJA1,GNRHR,HMGA1,HOXA10,HSF2,LHCGR,LIMK2,LMNA,MAP7,MOV10L1,MYBL1,NHLH2,NKD1,OCA2,OVOL1,PABPN1,PATZ1,PICK1,POU5F1,PPP1CC,PROKR2,RAD23B,RBP1,RNF17,ROR2,SNAI2,SPO11,SYCP1,SYCP2,SYCP3,TBPL1,UBB,UBC,WWOX
Mouse Phenotype	increased erythroid progenitor cell number	7.79886e-05	0.0051782	2.79324	5.72811	16	45	8	15	22	CCNE1,GATA1,JAK2,LYN,OPRM1,SELP,SIN3B,STEAP3	CBFB,CCNE1,FOXN1,GATA1,HBB,HBD,JAK2,LYN,OPRM1,PTPN6,SELE,SELP,SIN3B,STEAP3,TMPO
Mouse Phenotype	abnormal brain wave pattern	0.000107841	0.00663229	1.40115	83.5032	117	656	31	40	42	ALDH5A1,ARX,BID,BSN,CACNA1A,CACNA2D2,CACNB4,CACNG2,CHRNA4,DRD1,EPM2A,GABBR2,GABRG2,GAD1,GJD2,GRIK4,HLF,KCNA1,KCNA2,KCNC2,NOS1,NOS2,NPAS2,PCMT1,PER3,RAI1,RYR2,S1PR2,SLC2A3,TSC1,UBE3A	ALDH5A1,ARX,BID,BSN,CACNA1A,CACNA2D2,CACNB4,CACNG2,CHRNA4,DBP,DRD1,EPM2A,GABBR2,GABRG2,GAD1,GJD2,GRIK4,GRIN1,HLF,KCNA1,KCNA2,KCNC2,NOS1,NOS2,NPAS2,PCMT1,PER1,PER2,PER3,RAI1,RYR2,S1PR2,SCN1A,SLC17A8,SLC2A3,SSTR1,SSTR2,TEF,TSC1,UBE3A
Mouse Phenotype	abnormal white fat cell number	0.000124529	0.0073783	2.12766	12.22	26	96	6	6	7	CDKN1A,CDKN1B,ESR1,KSR1,PPARG,RPTOR	CDKN1A,CDKN1B,ESR1,KSR1,PPARG,RPTOR
TreeFam	Transmembrane protein precursor	4.77615e-24	1.31447e-19	2.98528	31.8228	95	250	4	5	5	TMEM132B,TMEM132C,TMEM132D,TMEM132E	TMEM132A,TMEM132B,TMEM132C,TMEM132D,TMEM132E
TreeFam	Zinc finger protein	2.55031e-21	4.67923e-17	5.54541	6.49186	36	51	9	12	32	ZFP28,ZFP62,ZNF225,ZNF461,ZNF470,ZNF471,ZNF573,ZNF780A,ZNF835	ZFP28,ZFP62,ZNF225,ZNF267,ZNF461,ZNF470,ZNF471,ZNF544,ZNF565,ZNF573,ZNF780A,ZNF835
TreeFam	Zinc finger protein	8.51935e-20	1.17233e-15	6.80853	3.81874	26	30	7	8	10	ZFP112,ZNF214,ZNF226,ZNF227,ZNF233,ZNF234,ZNF235	ZFP112,ZNF214,ZNF226,ZNF227,ZNF233,ZNF234,ZNF235,ZNF239
TreeFam	Zinc finger protein	1.80479e-15	6.62273e-12	5.11553	5.47353	28	43	5	6	6	AF035281,ZNF212,ZNF398,ZNF746,ZNF777	AF035281,ZNF212,ZNF282,ZNF398,ZNF746,ZNF777
TreeFam	Gamma-aminobutyric acid receptor subunit precursor (GABA(A)	4.67109e-11	3.52207e-08	2.29423	28.7678	66	226	15	20	23	GABRA1,GABRA2,GABRA3,GABRA5,GABRA6,GABRB2,GABRB3,GABRG1,GABRG2,GABRG3,GABRP,GABRQ,GABRR1,GLRA1,GLRA3	GABRA1,GABRA2,GABRA3,GABRA5,GABRA6,GABRB2,GABRB3,GABRD,GABRE,GABRG1,GABRG2,GABRG3,GABRP,GABRQ,GABRR1,GLRA1,GLRA2,GLRA3,GLRA4,GLRB
TreeFam	receptor	5.37805e-10	2.93093e-07	2.19159	29.6589	65	233	13	15	17	ADRA2A,ADRA2C,ADRB1,ADRB2,DRD1,HRH2,HTR1B,HTR1F,HTR2A,HTR2B,HTR2C,HTR4,HTR5A	ADRA2A,ADRA2C,ADRB1,ADRB2,DRD1,HRH2,HTR1A,HTR1B,HTR1D,HTR1F,HTR2A,HTR2B,HTR2C,HTR4,HTR5A
TreeFam	Ubiquitin-conjugating enzyme E2 M	9.42556e-10	4.71647e-07	5.61142	2.67312	15	21	3	3	3	SCLY,UBE2F,UBE2M	SCLY,UBE2F,UBE2M
TreeFam	precursor	3.17116e-09	1.34269e-06	4.76971	3.56416	17	28	9	12	20	KLK1,KLK13,KLK14,KLK2,KLK4,KLK5,KLK7,KLK8,KLK9	KLK1,KLK12,KLK13,KLK14,KLK15,KLK2,KLK4,KLK5,KLK7,KLK8,KLK9,TRYX3
TreeFam	Zinc finger protein	3.30765e-09	1.37926e-06	6.00752	2.16395	13	17	4	4	23	ZFP62,ZNF182,ZNF546,ZNF780B	ZFP62,ZNF182,ZNF546,ZNF780B
TreeFam	Zinc finger protein	4.07838e-09	1.66286e-06	3.0442	10.1833	31	80	12	17	51	ZNF264,ZNF286B,ZNF329,ZNF334,ZNF485,ZNF519,ZNF557,ZNF599,ZNF660,ZNF664,ZNF74,ZNF8	ZNF181,ZNF264,ZNF286A,ZNF286B,ZNF329,ZNF334,ZNF436,ZNF485,ZNF514,ZNF519,ZNF557,ZNF599,ZNF660,ZNF664,ZNF74,ZNF8,ZNF80
TreeFam	Solute carrier family 22 member	6.36147e-08	1.52906e-05	2.98749	9.03769	27	71	10	11	17	SLC22A11,SLC22A12,SLC22A13,SLC22A15,SLC22A16,SLC22A2,SLC22A3,SLC22A5,SLC22A6,SLC22A8	SLC22A11,SLC22A12,SLC22A13,SLC22A15,SLC22A16,SLC22A2,SLC22A3,SLC22A5,SLC22A6,SLC22A7,SLC22A8
TreeFam	E3 ubiquitin-protein ligase	7.22483e-08	1.70677e-05	2.8478	10.1833	29	80	5	7	7	ITCH,NEDD4,NEDD4L,SMURF1,WWP1	ITCH,NEDD4,NEDD4L,SMURF1,SMURF2,WWP1,WWP2
TreeFam	phosphate transport protein	1.06081e-06	0.000165881	3.69694	4.32791	16	34	4	7	8	SLC17A1,SLC17A2,SLC17A3,SLC17A4	SLC17A1,SLC17A2,SLC17A3,SLC17A4,SLC17A6,SLC17A7,SLC17A8
TreeFam	precursor	2.65878e-06	0.000353495	4.08512	3.18228	13	25	4	4	5	COL29A1,MATN1,MATN2,MATN3	COL29A1,MATN1,MATN2,MATN3
TreeFam	PANX1/PANX3/PANX2-203	4.25155e-06	0.000510957	7.85599	0.763748	6	6	3	3	3	PANX1,PANX2,PANX3	PANX1,PANX2,PANX3
TreeFam	protein Tripartite motif-containing	7.93023e-06	0.000841047	5.71345	1.4002	8	11	6	7	21	TRIM10,TRIM38,TRIM39,TRIM60,TRIM68,TRIM75	TRIM10,TRIM21,TRIM38,TRIM39,TRIM60,TRIM68,TRIM75
TreeFam	SYNGR2/SYNGR3/SYNGR1/SYNGR4/AC111152	9.19899e-06	0.000948203	4.62117	2.16395	10	17	3	3	5	MAP3K7IP1,SYNGR1C,SYNGR4	MAP3K7IP1,SYNGR1C,SYNGR4
TreeFam	precursor Coagulation factor Factor VIIIa heavy V	2.65145e-05	0.00219464	6.73371	0.89104	6	7	4	4	5	CP,F5,F8,HEPHL1	CP,F5,F8,HEPHL1
TreeFam	SYT13/SYT10/SYT4/AP003108_F6/SYT9/SYT3-202/SYT8-004/SYT5/SYT2-001/SYT11/SYT6-004/RIMS3/RIMS4/SYT15/AC004082/SYT1/SYT12/SYT7-201/AC004985_F5	3.37525e-05	0.00265406	1.64722	39.4603	65	310	15	17	18	PCLO,RIMS4,SYT1,SYT10,SYT12,SYT13,SYT15,SYT17,SYT2,SYT3,SYT4,SYT6,SYT7,SYT8,SYT9	PCLO,RIMS3,RIMS4,SYT1,SYT10,SYT11,SYT12,SYT13,SYT15,SYT17,SYT2,SYT3,SYT4,SYT6,SYT7,SYT8,SYT9
TreeFam	receptor precursor	4.73619e-05	0.00348522	2.28372	10.9471	25	86	8	14	16	ADCYAP1R1,CALCR,CALCRL,CRHR1,CRHR2,GLP1R,PTH1R,VIPR2	ADCYAP1R1,CALCR,CALCRL,CRHR1,CRHR2,GCGR,GHRHR,GHRHR,GIPR,GLP1R,GLP2R,PTH1R,PTH2R,VIPR2
TreeFam	Zinc finger protein	4.87246e-05	0.00356168	4.83446	1.65479	8	13	5	6	16	ZNF334,ZNF382,ZNF567,ZNF674,ZNF684	ZNF157,ZNF334,ZNF382,ZNF567,ZNF674,ZNF684
TreeFam	Histone H2A type	0.000179181	0.00983317	6.54666	0.763748	5	6	4	4	46	H2AFB3,HIST1H2AA,HIST1H4C,HIST1H4H	H2AFB3,HIST1H2AA,HIST1H4C,HIST1H4H
TreeFam	Protein-arginine deiminase	0.000179181	0.00982337	6.54666	0.763748	5	6	4	4	5	PADI2,PADI3,PADI4,PADI6	PADI2,PADI3,PADI4,PADI6
GO Biological Process	ion transport	2.16919e-13	4.42217e-10	1.20942	1054.23	1275	8282	370	548	765	ABCC4,ACCN1,ACCN2,ADD2,ADRA1A,AKAP7,ANKH,ANO1,ANO10,ANO2,ANO3,ANO4,ANO5,ANO6,ARMC1,ATOX1,ATP11B,ATP13A3,ATP1A1,ATP1A3,ATP1B1,ATP2A1,ATP2B1,ATP2B2,ATP2B3,ATP4A,ATP5H,ATP5J,ATP5S,ATP6V0A2,ATP6V0C,ATP6V0D2,ATP6V0E1,ATP6V0E2,ATP6V1A,ATP6V1C1,ATP6V1E1,ATP6V1G3,ATP6V1H,AX747640,BEST1,BHLHA15,CACHD1,CACNA1A,CACNA1B,CACNA1C,CACNA1D,CACNA1E,CACNA1G,CACNA1I,CACNA2D1,CACNA2D2,CACNA2D3,CACNA2D4,CACNB2,CACNB3…	ABCC4,ABCC8,ACCN1,ACCN2,ACCN4,ADD2,ADRA1A,AKAP7,ANKH,ANO1,ANO10,ANO2,ANO3,ANO4,ANO5,ANO6,ANO7,ANO8,APOL1,AQP6,ARL6IP5,ARMC1,ATOX1,ATP11B,ATP13A3,ATP13A4,ATP13A5,ATP1A1,ATP1A2,ATP1A3,ATP1B1,ATP1B2,ATP1B3,ATP1B4,ATP2A1,ATP2A2,ATP2A3,ATP2B1,ATP2B2,ATP2B3,ATP2B4,ATP2C1,ATP4A,ATP5G1,ATP5G2,ATP5G3,ATP5H,ATP5J,ATP5L,ATP5S,ATP6AP1L,ATP6V0A1,ATP6V0A2,ATP6V0C,ATP6V0D1,ATP6V0D2,ATP6V0E1,ATP6V0E2,ATP6V1A,ATP…
GO Biological Process	regulation of nucleotide metabolic process	1.77145e-12	2.32157e-09	1.34458	383.02	515	3009	149	230	295	ACAP2,ACR,ADAP2,ADCY2,ADCY5,ADCY6,ADCY7,ADCY8,ADCY9,ADCYAP1,ADCYAP1R1,ADORA2A,ADORA2A,ADORA3,ADRA2A,ADRB1,ADRB2,AGAP1,AGAP2,AGAP3,AGFG1,ALDOB,ALS2,AMPH,ARAP1,ARAP2,ARAP3,ARFGAP3,ARHGAP27,ARHGAP6,ASAP1,ASAP2,ASAP3,BCL6,C6orf170,CALCA,CALCR,CALCRL,CHML,CHRM5,CORT,CRHR1,DOCK7,DRD1,DRD2,EDN1,EDNRB,EVI5,FGD2,FGD4,FGD5,FICD,FOXJ1,FSHR,GABBR2,GALR1,GDI2,GHRH,GIT2,GLP1R,GMIP,GNAI1,GNAI2,GNAI3,GNAL,GNAO1,…	ABCA1,ACAP2,ACR,ADAP2,ADCY2,ADCY3,ADCY5,ADCY6,ADCY7,ADCY8,ADCY9,ADCYAP1,ADCYAP1R1,ADNP,ADORA1,ADORA2A,ADORA2A,ADORA2B,ADORA3,ADRA2A,ADRB1,ADRB2,AGAP1,AGAP2,AGAP3,AGAP4,AGAP6,AGFG1,AGFG2,AIPL1,AKAP12,AKAP5,ALDOB,ALS2,AMPH,ARAP1,ARAP2,ARAP3,ARFGAP2,ARFGAP3,ARHGAP27,ARHGAP6,ASAP1,ASAP2,ASAP3,ATPIF1,AVP,AVPR2,BCL6,BVES,C6orf170,CALCA,CALCR,CALCRL,CAP1,CAP2,CASR,CDA,CHML,CHRM4,CHRM5,CORT,CRHR1,DOCK7,D…
GO Biological Process	transmembrane transport	1.80095e-11	1.57349e-08	1.26721	561.864	712	4414	244	382	572	ABCB1,ABCB5,ABCC1,ABCC3,ABCC4,ABCC5,ABRA,AHCTF1,AQP4,AQP9,ATP2A1,ATP4A,ATP5H,ATP5J,ATP6V0A2,ATP6V0C,ATP6V0D2,ATP6V0E1,ATP6V0E2,ATP6V1A,ATP6V1C1,ATP6V1E1,ATP6V1H,AX747640,CACNA1A,CACNA1B,CACNA1C,CACNA1D,CACNA1E,CACNA1G,CACNA1I,CATSPER3,CATSPER4,CLCN3,CLCN4,CLCN5,CNGA3,CNGB3,DDX19B,DNAJC19,FAM188B,FLVCR1,FLVCR2,GLE1,GRPEL2,HCN4,HIAT1,ITPR1,KCNA1,KCNA10,KCNA2,KCNA4,KCNA5,KCNA6,KCNB1,KCNB2,KCNC1,KCNC…	ABCB1,ABCB10,ABCB4,ABCB5,ABCB9,ABCC1,ABCC12,ABCC13,ABCC2,ABCC3,ABCC4,ABCC5,ABCC6,ABCC8,ABCD3,ABRA,AHCTF1,APOA1,AQP3,AQP4,AQP6,AQP9,ATP1A2,ATP2A1,ATP4A,ATP5G1,ATP5G2,ATP5G3,ATP5H,ATP5J,ATP5L,ATP6AP1L,ATP6V0A1,ATP6V0A2,ATP6V0C,ATP6V0D1,ATP6V0D2,ATP6V0E1,ATP6V0E2,ATP6V1A,ATP6V1B1,ATP6V1B2,ATP6V1C1,ATP6V1D,ATP6V1E1,ATP6V1F,ATP6V1H,ATP7B,AX747640,C18orf55,C3orf31,CACNA1A,CACNA1B,CACNA1C,CACNA1D,CACNA1…
GO Biological Process	synaptic transmission	4.22043e-11	3.31865e-08	1.24767	624.364	779	4905	183	254	305	ABAT,ACCN1,ADORA2A,ADORA2A,AGTPBP1,ALDH5A1,ALS2,AMPH,AP2B1,APBA1,APBA2,APP,ATXN1,BSN,CACNA1A,CACNA1B,CACNA1E,CACNB2,CACNB4,CAMK4,CARTPT,CAV2,CBLN1,CHRFAM7A,CHRM1,CHRNA1,CHRNA10,CHRNA4,CHRNA7,CHRNB2,CHRNB3,CNP,COLQ,COMT,CORT,CPLX2,CPLX3,CRH,CTNNA2,CTNNB1,DBH,DLGAP1,DMD,DMPK,DRD1,DRD2,DTNA,EGR3,EXOC4,FGF2,FNTA,FRMPD4,GABBR2,GABRA2,GABRA3,GABRA5,GABRA6,GABRB2,GABRB3,GABRG1,GABRG2,GABRG3,GABRR1,GAD1,…	ABAT,ACCN1,ACHE,ADNP,ADORA1,ADORA2A,ADORA2A,AGRN,AGTPBP1,AKAP5,AKAP9,ALDH5A1,ALS2,AMPH,AP2B1,APBA1,APBA2,APP,ATP1A2,ATXN1,BSN,CACNA1A,CACNA1B,CACNA1E,CACNB2,CACNB4,CAMK4,CARTPT,CAV2,CBLN1,CHAT,CHRFAM7A,CHRM1,CHRNA1,CHRNA10,CHRNA4,CHRNA5,CHRNA6,CHRNA7,CHRNB2,CHRNB3,CHRNB4,CNP,COLQ,COMT,CORT,CPLX2,CPLX3,CPNE6,CRH,CTNNA2,CTNNB1,DBH,DFNB31,DLG4,DLGAP1,DMD,DMPK,DRD1,DRD2,DRD3,DRD5,DTNA,EGR3,EXOC4,FGF2…
GO Biological Process	G-protein coupled receptor protein signaling pathway	4.26201e-11	3.30414e-08	1.21298	828.54	1005	6509	330	535	1049	ADCY2,ADCY5,ADCY6,ADCY7,ADCY8,ADCY9,ADCYAP1R1,ADORA2A,ADORA2A,ADORA3,ADRA1A,ADRA1B,ADRA1D,ADRA2A,ADRA2C,ADRB1,ADRB2,ADRBK1,AGK,AGTR1,AK310228,AK310228,APLNR,APLP2,ARHGEF11,ARHGEF12,ATRNL1,AVPR1A,BAI1,BAI3,BCAR1,BDKRB1,BHLHA15,CACNA1A,CACNA1D,CACNB4,CALCA,CALCR,CALCRL,CALM1,CALM2,CARTPT,CCKAR,CCL25,CCR4,CCR5,CD97,CDK5R1,CELSR1,CENPI,CERKL,CHRM1,CHRM2,CHRM3,CHRM5,CMKLR1,CORT,CPE,CPZ,CRHR1,CRHR2,CX3…	ABCA1,ADCY2,ADCY3,ADCY5,ADCY6,ADCY7,ADCY8,ADCY9,ADCYAP1R1,ADORA1,ADORA2A,ADORA2A,ADORA2B,ADORA3,ADRA1A,ADRA1B,ADRA1D,ADRA2A,ADRA2B,ADRA2C,ADRB1,ADRB2,ADRBK1,AGK,AGRN,AGT,AGTR1,AK310228,AK310228,AKAP12,APLNR,APLP2,APOA1,AREG,ARHGEF11,ARHGEF12,ATRNL1,AVPR1A,AVPR2,BAI1,BAI2,BAI3,BCAR1,BDKRB1,BHLHA15,BRS3,C3AR1,C5,CACNA1A,CACNA1D,CACNB4,CALCA,CALCR,CALCRL,CALM1,CALM2,CALM3,CARTPT,CASR,CCK,CCKAR,CCKBR…
GO Biological Process	single fertilization	5.77494e-10	3.11637e-07	2.05174	37.0418	76	291	24	39	69	ACR,ADAM2,ADAM20,AKAP4,ARSA,B4GALT1,GLRA1,HYAL4,OR10J1,PLCD4,PLCZ1,SLC22A16,SPA17,SPACA3,SPAG1,SPAM1,SYT6,SYT8,TNP1,TUBGCP3,UBE3A,ZP1,ZP4,ZPBP	ACR,ADAM2,ADAM20,AKAP3,AKAP4,ARSA,B4GALT1,CD46,CD9,CRISP1,DNALI1,GLRA1,GLRB,GNPDA1,HEXB,HYAL4,IGSF8,MFGE8,OR10J1,PKDREJ,PLCD4,PLCZ1,SLC22A16,SMCP,SPA17,SPACA3,SPAG1,SPAM1,SYT6,SYT8,TNP1,TRIM36,TUBGCP3,UBE3A,ZP1,ZP2,ZP4,ZPBP,ZPBP2
GO Biological Process	M phase	8.66732e-10	4.41736e-07	1.31986	332.612	439	2613	158	247	358	AKAP8,ANAPC1,ANAPC4,ANAPC7,APC,ARHGEF2,ATM,BRCA2,BUB1,BUB3,C13orf34,C14orf106,CCNB2,CCNG1,CCNK,CD2AP,CDC2,CDC25A,CDC27,CDKL3,CENPE,CENPV,CEP120,CEP192,CETN3,CIT,CKAP5,CLASP1,CLASP2,CLIP1,CLTC,CLTCL1,CRYAA,CSNK1A1,CUL3,CYP26B1,DDX11,DLGAP5,DMC1,DMWD,DSN1,EML4,EXO1,FBXO43,FMN2,HAUS4,HDAC3,HGF,HORMAD2,HSPA2,ILF3,INCENP,KATNA1,KATNB1,KIAA0892,KIAA1009,KIF11,KIF15,KIF18A,KIF20B,KIF25,KIF2A,KIF2B,KLHL1…	ADCY3,AKAP8,ANAPC1,ANAPC13,ANAPC4,ANAPC5,ANAPC7,ANLN,APC,ARHGEF2,ASZ1,ATM,BOD1,BRCA2,BUB1,BUB3,C10orf104,C13orf34,C14orf106,C21orf45,C7orf11,CCDC99,CCNA1,CCNA2,CCNB2,CCNB3,CCNG1,CCNG2,CCNK,CD2AP,CDC2,CDC23,CDC25A,CDC25C,CDC27,CDC6,CDCA2,CDCA8,CDKL3,CENPE,CENPV,CEP120,CEP164,CEP192,CETN1,CETN3,CHEK1,CIT,CKAP5,CLASP1,CLASP2,CLIP1,CLTC,CLTCL1,CPEB1,CRYAA,CSNK1A1,CUL3,CYP26B1,DCLRE1A,DCTN1,DCTN2,DDX1…
GO Biological Process	response to alkaloid	1.2411e-09	5.94035e-07	1.64722	86.8127	143	682	35	55	64	ABAT,ADORA2A,ADORA2A,ADRA1B,BCHE,BCL2,CHRFAM7A,CHRNA4,CHRNA7,CHRNB2,DOCK5,DPYSL2,DRD1,DRD2,GHR,GNAL,GNAO1,GRM2,HDAC2,HTR1B,IGF2,OPRM1,OXTR,PLCG1,PPARG,PPP5C,PRKAA2,RYR1,RYR2,SHC1,SLC6A1,SLC6A3,TAC1,TACR1,TACR3	ABAT,ADORA2A,ADORA2A,ADRA1B,AVP,BCHE,BCL2,CHEK1,CHRFAM7A,CHRNA4,CHRNA5,CHRNA7,CHRNB2,CHRNB4,CNR1,DOCK5,DPYSL2,DRD1,DRD2,DRD3,DRD5,EDNRA,GABBR1,GHR,GNAL,GNAO1,GNAT3,GRM2,HDAC2,HDAC5,HTR1B,IGF2,IL1B,IL6,KCNK1,OPRM1,OXTR,PCSK1,PLCG1,PPARG,PPP5C,PRKAA2,PTK2B,RELA,RYR1,RYR2,SDC2,SHC1,SLC6A1,SLC6A3,SMPD1,SRR,TAC1,TACR1,TACR3
GO Biological Process	proteolysis	2.46931e-09	1.05363e-06	1.20421	734.089	884	5767	308	472	739	ABHD5,ACR,ADAM12,ADAM15,ADAM17,ADAM2,ADAM20,ADAM22,ADAM23,ADAM28,ADAM29,ADAM32,ADAM7,ADAMTS1,ADAMTS12,ADAMTS14,ADAMTS15,ADAMTS16,ADAMTS17,ADAMTS18,ADAMTS19,ADAMTS2,ADAMTS20,ADAMTS3,ADAMTS5,ADAMTS6,ADAMTS7,ADAMTS9,AFG3L2,AGBL1,AGBL2,AGBL3,AGBL4,AGBL5,AGTPBP1,AMFR,ANAPC1,ANAPC4,ANAPC7,APEH,ATE1,ATG4A,ATG4C,BACE2,BUB3,C10orf46,C1S,C6orf103,C9orf3,CAPN10,CAPN12,CAPN13,CAPN14,CAPN3,CAPN8,CAPN9,CAPNS1,…	ABHD5,ACAN,ACR,ADAM10,ADAM11,ADAM12,ADAM15,ADAM17,ADAM19,ADAM2,ADAM20,ADAM22,ADAM23,ADAM28,ADAM29,ADAM30,ADAM32,ADAM7,ADAM9,ADAMTS1,ADAMTS12,ADAMTS13,ADAMTS14,ADAMTS15,ADAMTS16,ADAMTS17,ADAMTS18,ADAMTS19,ADAMTS2,ADAMTS20,ADAMTS3,ADAMTS4,ADAMTS5,ADAMTS6,ADAMTS7,ADAMTS8,ADAMTS9,AEBP1,AFG3L2,AGBL1,AGBL2,AGBL3,AGBL4,AGBL5,AGTPBP1,AMFR,ANAPC1,ANAPC4,ANAPC5,ANAPC7,ANPEP,APEH,APH1A,APH1B,ARIH1,ARRB1,ARR…
GO Biological Process	regulation of Rho protein signal transduction	3.92071e-09	1.6105e-06	1.49638	133.656	200	1050	70	90	112	ABL1,ABRA,ADRA1A,ALS2,ARAP1,ARAP3,ARHGAP27,ARHGEF10L,ARHGEF11,ARHGEF12,ARHGEF17,ARHGEF18,ARHGEF2,ARHGEF3,ARHGEF6,ARHGEF7,BCL6,CDH2,CUL3,DLC1,DNMBP,DOCK7,ECT2,ECT2L,FARP1,FARP2,FGD2,FGD4,FGD5,FICD,FLJ41603,FOXJ1,GMIP,ITSN1,ITSN2,KALRN,KCTD13,KIAA1112,LOC100271715,LPAR2,MCF2L,MCF2L2,NDEL1,NET1,NGEF,PAFAH1B1,PLEKHG1,PLEKHG7,PREX1,PREX2,RALBP1,RASGRF1,RASGRF2,RGNEF,RICTOR,SCAI,SGEF,SH3D20,SOS1,SOS2,S…	ABL1,ABRA,ADRA1A,AKAP13,ALS2,ARAP1,ARAP3,ARHGAP27,ARHGEF10L,ARHGEF11,ARHGEF12,ARHGEF16,ARHGEF17,ARHGEF18,ARHGEF19,ARHGEF2,ARHGEF3,ARHGEF6,ARHGEF7,ARRB1,BCL6,BCR,BVES,CDH2,CUL3,DLC1,DNMBP,DOCK7,ECT2,ECT2L,FARP1,FARP2,FGD1,FGD2,FGD4,FGD5,FGD6,FICD,FLJ10357,FLJ20184,FLJ41603,FOXJ1,GMIP,GPR65,ITSN1,ITSN2,KALRN,KCTD13,KIAA1112,LOC100271715,LPAR1,LPAR2,MCF2,MCF2L,MCF2L2,MTOR,NDEL1,NET1,NGEF,NR2C1,PAFAH…
GO Biological Process	regulation of Ras protein signal transduction	4.40229e-09	1.75591e-06	1.2974	349.16	453	2743	139	189	241	ABL1,ABRA,ACAP2,ADAP2,ADRA1A,AGAP1,AGAP2,AGAP3,AGFG1,ALS2,ARAP1,ARAP2,ARAP3,ARF6,ARFGAP3,ARFGEF1,ARHGAP27,ARHGEF10L,ARHGEF11,ARHGEF12,ARHGEF17,ARHGEF18,ARHGEF2,ARHGEF3,ARHGEF6,ARHGEF7,ASAP1,ASAP2,ASAP3,BCL6,C6orf170,CDH2,CSF1,CUL3,CYTH1,CYTH3,CYTH4,DLC1,DNMBP,DOCK7,ECT2,ECT2L,EPO,ERBB2,EVI5,FARP1,FARP2,FBXO8,FGD2,FGD4,FGD5,FICD,FLJ41603,FOXJ1,GBF1,GIT2,GMIP,ICMT,IGF1,IQSEC1,IQSEC2,ITPKB,ITSN1,ITS…	ABL1,ABRA,ACAP2,ADAP2,ADRA1A,AGAP1,AGAP2,AGAP3,AGAP4,AGAP6,AGFG1,AGFG2,AKAP13,ALS2,ARAP1,ARAP2,ARAP3,ARF6,ARFGAP2,ARFGAP3,ARFGEF1,ARFGEF2,ARHGAP27,ARHGEF10L,ARHGEF11,ARHGEF12,ARHGEF16,ARHGEF17,ARHGEF18,ARHGEF19,ARHGEF2,ARHGEF3,ARHGEF6,ARHGEF7,ARRB1,ASAP1,ASAP2,ASAP3,BCL6,BCR,BVES,C6orf170,CDH2,CSF1,CUL3,CYTH1,CYTH2,CYTH3,CYTH4,DGKZ,DLC1,DNMBP,DOCK7,ECT2,ECT2L,EPO,ERBB2,EVI5,EVI5L,FARP1,FARP2,FBXO…
GO Biological Process	ribosome biogenesis	4.79565e-09	1.88548e-06	1.70975	67.8463	116	533	37	67	136	AATF,BMS1,C18orf22,C1D,DIS3,DKC1,EIF4A3,EXOSC2,EXOSC7,EXOSC9,GNL3L,GSTCD,GTPBP4,KRR1,LSM6,MINA,NAF1,NOP56,NSA2,POP4,RNASEN,RPL24,RPL5,RPS24,RRP1B,RRP8,RRP9,RRS1,RSL24D1,SUV39H1,TFB2M,TSC1,TSR1,TSR2,UTP18,VCX,ZNHIT6	AATF,BMS1,C18orf22,C1D,CDKN2A,DIMT1L,DIS3,DKC1,EIF4A3,EIF6,EXOSC10,EXOSC2,EXOSC7,EXOSC9,FRG1,FTSJ1,GNL2,GNL3L,GSTCD,GTPBP10,GTPBP4,HEATR1,KRR1,LSM6,MINA,NAF1,NHP2,NOP2,NOP56,NOP58,NPM3,NSA2,PIN4,POP4,RCL1,RNASEN,RPF1,RPL11,RPL24,RPL35A,RPL5,RPL7,RPLP0,RPS14,RPS17,RPS24,RPS28,RPS6,RRP1B,RRP8,RRP9,RRS1,RSL24D1,SUV39H1,TFB1M,TFB2M,TSC1,TSR1,TSR2,UTP11L,UTP14A,UTP18,UTP23,UTP6,VCX,WDR36,ZNHIT6
GO Biological Process	nuclear export	8.00668e-09	2.91862e-06	1.87472	44.8066	84	352	25	37	62	AGFG1,ATXN1,DDX19B,DDX39,GLE1,HHEX,HSPA9,LSG1,MALT1,NCBP1,NCBP2,NUP133,NUP214,RAN,SMG5,SMG6,SMG7,SMURF1,THOC1,THOC2,THOC3,TSC1,UPF2,XPO1,XPO6	AGFG1,ATXN1,DDX19B,DDX25,DDX39,DUSP16,EIF5A,GLE1,HHEX,HNRNPA1,HSPA9,LSG1,MALT1,NCBP1,NCBP2,NUP107,NUP133,NUP160,NUP214,NUPL2,NXF1,PABPN1,RAN,SMG5,SMG6,SMG7,SMURF1,THOC1,THOC2,THOC3,TSC1,UPF1,UPF2,XPO1,XPO6,XPO7,XPOT
GO Biological Process	hormone-mediated signaling pathway	8.73038e-09	3.14083e-06	1.8791	44.1701	83	347	28	36	52	ADCY2,ADCY5,ADCY6,ADCY7,ADCY8,ADCY9,ASIP,DNAJC25,GCG,GHR,GNAS,GNB1,GNB3,GNB4,GNG12,GNG2,GNG4,GNG8,JAK2,KDM3A,LATS1,LATS2,LHCGR,PRKACA,PRKACG,PRKAR1A,PRKAR2A,PTPN11	ADCY2,ADCY3,ADCY5,ADCY6,ADCY7,ADCY8,ADCY9,ASIP,CUZD1,DNAJC25,GCG,GCGR,GHR,GHSR,GNAS,GNB1,GNB2,GNB3,GNB4,GNG12,GNG2,GNG4,GNG8,JAK2,KDM3A,LATS1,LATS2,LHCGR,PRKACA,PRKACB,PRKACG,PRKAR1A,PRKAR2A,PRKAR2B,PTPN11,THRA
GO Biological Process	regulation of small GTPase mediated signal transduction	1.3116e-08	4.22189e-06	1.25549	436.482	548	3429	164	224	281	ABL1,ABRA,ACAP2,ADAP2,ADRA1A,AGAP1,AGAP2,AGAP3,AGFG1,ALS2,ARAP1,ARAP2,ARAP3,ARF6,ARFGAP3,ARFGEF1,ARHGAP27,ARHGEF10L,ARHGEF11,ARHGEF12,ARHGEF17,ARHGEF18,ARHGEF2,ARHGEF3,ARHGEF6,ARHGEF7,ASAP1,ASAP2,ASAP3,BCL6,C6orf170,CDC42BPA,CDH2,CSF1,CUL3,CYTH1,CYTH3,CYTH4,DAB2IP,DLC1,DNMBP,DOCK7,ECT2,ECT2L,EPO,ERBB2,EVI5,FARP1,FARP2,FBXO8,FGD2,FGD4,FGD5,FICD,FLJ41603,FOXJ1,GARNL3,GBF1,GIT2,GMIP,ICMT,IGF1,IQGAP2…	ABL1,ABRA,ACAP2,ADAP2,ADRA1A,AGAP1,AGAP2,AGAP3,AGAP4,AGAP6,AGFG1,AGFG2,AKAP13,ALS2,ARAP1,ARAP2,ARAP3,ARF6,ARFGAP2,ARFGAP3,ARFGEF1,ARFGEF2,ARHGAP27,ARHGEF10L,ARHGEF11,ARHGEF12,ARHGEF16,ARHGEF17,ARHGEF18,ARHGEF19,ARHGEF2,ARHGEF3,ARHGEF6,ARHGEF7,ARRB1,ASAP1,ASAP2,ASAP3,BCL6,BCR,BVES,C6orf170,CDC42BPA,CDH2,CSF1,CUL3,CYTH1,CYTH2,CYTH3,CYTH4,DAB2IP,DGKZ,DLC1,DNMBP,DOCK7,ECT2,ECT2L,EPO,ERBB2,EVI5,EVI5L,…
GO Biological Process	fatty acid beta-oxidation	1.44653e-08	4.52395e-06	3.42807	7.00103	24	55	9	17	29	ACADL,ACADS,ACOX2,ACOX3,BDH2,DECR1,EHHADH,HADHA,HSD17B4	ABCD1,ACADL,ACADM,ACADS,ACOX2,ACOX3,ACOXL,ADIPOQ,BDH2,CPT1A,CPT1B,DECR1,EHHADH,HADHA,HSD17B4,PEX7,PPARD
GO Biological Process	chromosome segregation	2.62547e-08	7.22568e-06	1.5873	86.94	138	683	46	60	89	AKAP8,ARL8B,BUB1,BUB3,CENPE,CIT,DDX11,DLGAP5,DSN1,FBXW7,FMN2,HJURP,INCENP,KIAA0892,KIF18A,KIF25,LATS1,MLH1,MRE11A,NCAPG,NDC80,NDEL1,NEK6,NIPBL,NUF2,PMF1,POLS,PTTG1,RAD21,RIOK3,RRS1,SEH1L,SGOL1,SKA1,SMC1B,SMC2,SOX7,SPC25,SRPK1,STAG2,STRA8,TEX11,TOP3B,TTN,USP9X,ZWINT	AKAP8,ARL8B,BRCA1,BUB1,BUB3,CCDC99,CDC23,CENPE,CIT,CTCF,DDX11,DLGAP5,DSN1,FBXW7,FMN2,HJURP,INCENP,KIAA0892,KIF18A,KIF25,LATS1,MLH1,MRE11A,NCAPG,NDC80,NDEL1,NEK2,NEK6,NIPBL,NUF2,NUP37,PAM,PDS5B,PMF1,POLS,PSRC1,PTTG1,RAD21,RIOK3,RRS1,SEH1L,SGOL1,SKA1,SKA2,SMC1A,SMC1B,SMC2,SMC3,SOX7,SPC25,SRPK1,STAG1,STAG2,STRA8,TEX11,TOP3B,TTN,USP9X,ZW10,ZWINT
GO Biological Process	monoamine transport	3.12882e-08	8.52572e-06	2.5299	15.0204	38	118	13	14	17	CHRM5,CRYM,DRD1,FCER1A,MECP2,PARK2,PARK7,PICK1,SLC22A3,SLC6A2,SLC6A3,SLC6A4,SYK	CHRM5,CRYM,DRD1,FCER1A,MECP2,PARK2,PARK7,PICK1,SLC18A2,SLC22A3,SLC6A2,SLC6A3,SLC6A4,SYK
GO Biological Process	macromolecule methylation	3.32632e-08	8.76031e-06	1.55244	95.9777	149	754	47	67	88	ATF7IP,BAZ2A,BHMT,BTG1,C12orf72,C17orf79,C1orf156,CARM1,CTCFL,DMAP1,DNMT1,DNMT3A,DNMT3B,DPY30,EED,EHMT1,EZH2,FOS,GATAD2A,HEMK1,ICMT,MAEL,MECP2,MLL,MLL3,MLL5,MTR,NSD1,NSUN2,PCMT1,PICK1,PIWIL4,PRMT1,PRMT3,PRMT6,PRMT8,RBBP5,SATB1,SETD2,SUV39H1,SUV39H2,SUV420H1,TDRD9,TFB2M,TGS1,WDR5,WHSC1L1	ALKBH8,ASH2L,ASZ1,ATF7IP,BAZ2A,BHMT,BTG1,BTG2,C12orf72,C17orf79,C1orf156,CARM1,CTCF,CTCFL,DMAP1,DNMT1,DNMT3A,DNMT3B,DPY30,EED,EHMT1,ETF1,EZH2,FOS,FTSJ1,GATAD2A,HEMK1,ICMT,MAEL,MECP2,MLL,MLL3,MLL5,MPHOSPH8,MTR,NSD1,NSUN2,PCMT1,PICK1,PIWIL2,PIWIL4,PRDM5,PRMT1,PRMT3,PRMT5,PRMT6,PRMT7,PRMT8,RAB3D,RAB6A,RBBP5,SATB1,SETD1B,SETD2,SUV39H1,SUV39H2,SUV420H1,SUV420H2,SUZ12,TDRD1,TDRD9,TFB2M,TGS1,TRMT61A,TRM…
GO Biological Process	visual behavior	6.15994e-08	1.50694e-05	1.64327	69.3738	114	545	21	27	32	ADAM2,ADRA1B,APBB1,APP,ATP1A3,ATXN1,CHRNB2,CRHR1,DBH,DRD1,DRD2,DYNLRB1,GRIN2A,HMGCR,HTT,KIT,MECP2,NETO1,NPHP1,NPHP4,PDE1B	ADAM2,ADRA1B,APBB1,APP,ATP1A2,ATP1A3,ATXN1,CHRNB2,CRHR1,DBH,DRD1,DRD2,DRD3,DRD5,DYNLRB1,GRIN1,GRIN2A,HMGCR,HTT,KIT,MECP2,NETO1,NF1,NLGN3,NPHP1,NPHP4,PDE1B
GO Biological Process	neurotransmitter transport	7.00954e-08	1.67751e-05	1.44074	139.511	201	1096	47	75	91	ADORA2A,ADORA2A,AP2B1,CACNA1A,CACNA1B,CPLX2,CPLX3,CPLX4,GABRA2,GRM2,HRH3,ICA1,LIN7A,LIN7C,NLGN1,NRXN2,NRXN3,P2RX7,PARK2,PARK7,PCLO,PLDN,RAB3A,RIMS1,RIMS4,SLC1A3,SLC22A3,SLC6A1,SLC6A11,SLC6A13,SLC6A15,SLC6A17,SLC6A2,SLC6A3,SLC6A4,SNAP25,SNAP91,SNPH,SPTBN2,STX1A,SV2C,SYN1,SYN2,SYN3,SYT1,SYT4,WNT7A	ADORA2A,ADORA2A,AP2B1,ATP1A2,CACNA1A,CACNA1B,CPLX2,CPLX3,CPLX4,GABRA2,GRM2,GRM4,HRH3,ICA1,LIN7A,LIN7B,LIN7C,NLGN1,NRXN2,NRXN3,P2RX7,PARK2,PARK7,PCLO,PLDN,PPFIA3,PSEN1,RAB14,RAB3A,RIMS1,RIMS3,RIMS4,SEPT5,SERPINB7,SLC17A6,SLC17A7,SLC17A8,SLC18A2,SLC1A3,SLC22A3,SLC25A4,SLC32A1,SLC6A1,SLC6A11,SLC6A12,SLC6A13,SLC6A15,SLC6A16,SLC6A17,SLC6A2,SLC6A20,SLC6A3,SLC6A4,SLC6A5,SLC6A6,SLC6A7,SLC6A8,SLC6A8,SLC6A…
GO Biological Process	regulation of cellular catabolic process	7.03192e-08	1.67557e-05	1.27626	337.704	431	2653	117	183	250	ABHD5,ACAP2,ADAP2,ADRA1B,ADRA2A,AGAP1,AGAP2,AGAP3,AGFG1,AKT2,ALDOB,ALS2,AMPH,ARAP1,ARAP2,ARAP3,ARFGAP3,ARHGAP27,ARHGAP6,ARNT,ASAP1,ASAP2,ASAP3,BCL6,C6orf170,CHML,DAP,DNAJB2,DOCK7,ECD,EVI5,FABP1,FGD2,FGD4,FGD5,FICD,FOXJ1,GDI2,GIT2,GMIP,GNAO1,GSK3A,HDAC4,HOMEZ,HTR2B,IGF1,INSR,IRS1,IRS2,MDM2,MYLIP,N4BP1,NDEL1,NRD1,OXA1L,PAFAH1B1,PCSK9,PIM2,PPARA,PPP1CB,PPP1CC,PRKAG1,PRKAG2,PTPN3,PTPRN2,RAB3GAP1,RAB3…	ABHD5,ACAP2,ADAM9,ADAP2,ADRA1B,ADRA2A,AGAP1,AGAP2,AGAP3,AGAP4,AGAP6,AGFG1,AGFG2,AKT2,ALDOB,ALS2,AMPH,APOC1,ARAP1,ARAP2,ARAP3,ARFGAP2,ARFGAP3,ARHGAP27,ARHGAP6,ARNT,ASAP1,ASAP2,ASAP3,BCL6,BVES,C6orf170,CASR,CHML,CISD2,CNR1,CPT1A,CSNK1E,CST3,DAP,DNAJB2,DOCK7,ECD,EVI5,EVI5L,FABP1,FGD1,FGD2,FGD4,FGD5,FGD6,FICD,FOXJ1,FURIN,GABARAPL2,GCLC,GDI2,GIPC1,GIT1,GIT2,GMIP,GNAO1,GPR65,GSK3A,HDAC4,HIF1A,HOMEZ,HTR…
GO Biological Process	protein modification by small protein conjugation or removal	1.36931e-07	2.94419e-05	1.31128	257.001	337	2019	123	198	272	AMFR,ANAPC1,ANAPC4,ANAPC7,ATG10,BCL2,BRCC3,CAND1,CDC27,CDC73,CNOT4,COPS5,CRBN,CUL1,CUL3,DCAF10,DCAF16,DCAF17,DCAF5,DCAF6,DDB1,DTL,FBXL5,FBXO11,FBXO3,FBXO45,FBXO9,FBXW11,FBXW7,G2E3,HECTD1,HERC2,HERC2P3,HUWE1,ITCH,KCTD13,KIAA0776,KLHL13,KLHL21,LEO1,LNX1,MAP3K1,MDM2,MIB1,MUL1,MYLIP,MYSM1,NEDD4,NEDD4L,OTUD7B,PARK2,PCNP,PDZRN3,PPIL2,PRPF19,PSMD14,RBBP6,RBX1,RING1,RNF13,RNF133,RNF135,RNF144B,RNF168,RNF…	AMFR,ANAPC1,ANAPC13,ANAPC4,ANAPC5,ANAPC7,ARRB1,ARRB2,ATG10,ATXN7,ATXN7L3,BARD1,BCL2,BRCA1,BRCC3,C10orf104,CAND1,CBL,CBLL1,CBX8,CDC23,CDC27,CDC73,CNOT4,COPS5,CRBN,CTR9,CUL1,CUL3,CYLD,DCAF10,DCAF16,DCAF17,DCAF5,DCAF6,DCAF8,DDB1,DTL,ENY2,FBXL21,FBXL3,FBXL5,FBXO11,FBXO2,FBXO3,FBXO4,FBXO45,FBXO9,FBXW11,FBXW7,G2E3,GABBR1,HECTD1,HERC2,HERC2P3,HUWE1,ITCH,KCTD10,KCTD13,KIAA0776,KLHL13,KLHL20,KLHL21,LEO1,L…
GO Biological Process	response to radiation	1.41795e-07	3.0369e-05	1.30023	274.567	357	2157	110	170	234	ABCA4,ACCN1,ADAM2,ADRA1B,ANGPT2,APBB1,APP,ATM,ATP1A3,ATR,ATXN1,BCL2,BCL2L1,BCL3,BHLHE40,BLM,BRCA2,BRCC3,BRE,C15orf42,C9orf80,CASP3,CASP6,CAT,CAV1,CCKAR,CCND1,CCR4,CDKN1A,CHRNB2,CLOCK,CNGB1,CRHR1,CRYAA,CXCL12,DBH,DCLRE1C,DCUN1D3,DNMT3B,DRD1,DRD2,DTL,DUSP1,DYNLRB1,EGFR,ERCC3,ERCC4,ERCC6,EYA1,EYA3,FAM188B,FKBPL,FOS,GRIN2A,GRM6,HMGCR,HTT,IGF2,IL12A,IL12B,INTS3,IVL,KIT,LIG4,MECP2,MSH6,NEDD4,NEK1,NETO1…	ABCA4,ABCG5,ACCN1,ADAM2,ADRA1B,AEN,AIPL1,ANGPT2,APBB1,APP,ARRB1,ATM,ATP1A2,ATP1A3,ATR,ATXN1,BAK1,BCL2,BCL2L1,BCL3,BHLHE40,BLM,BRCA1,BRCA2,BRCC3,BRE,C15orf42,C9orf80,CABP4,CASP3,CASP6,CASP7,CAT,CAV1,CCKAR,CCND1,CCR4,CDKN1A,CDKN2D,CHEK2,CHRNB2,CLOCK,CNGB1,COL3A1,CRHR1,CRYAA,CXCL12,DBH,DCLRE1C,DCUN1D3,DNMT3B,DRD1,DRD2,DRD3,DRD5,DTL,DUSP1,DYNLRB1,EGFR,ERCC1,ERCC3,ERCC4,ERCC5,ERCC6,EYA1,EYA3,FAM188B,F…
GO Biological Process	methylation	1.82844e-07	3.79784e-05	1.461	119.781	175	941	52	74	95	ATF7IP,BAZ2A,BHMT,BTG1,C12orf72,C17orf79,C1orf156,CARM1,CTCFL,DMAP1,DNMT1,DNMT3A,DNMT3B,DPY30,EED,EHMT1,EZH2,FOS,FTSJD1,GATAD2A,HEMK1,ICMT,MAEL,MECP2,METTL4,MLL,MLL3,MLL5,MTR,N6AMT1,N6AMT2,NSD1,NSUN2,PCMT1,PICK1,PIWIL4,PRMT1,PRMT3,PRMT6,PRMT8,RBBP5,SATB1,SETD2,SUV39H1,SUV39H2,SUV420H1,TDRD9,TFB2M,TGS1,WDR5,WHSC1L1,ZCCHC4	ALKBH8,ASH2L,ASZ1,ATF7IP,BAZ2A,BHMT,BTG1,BTG2,C12orf72,C17orf79,C1orf156,CARM1,CTCF,CTCFL,DMAP1,DNMT1,DNMT3A,DNMT3B,DPY30,EED,EHMT1,ETF1,EZH2,FOS,FTSJ1,FTSJD1,FTSJD2,GATAD2A,HEMK1,ICMT,MAEL,MECP2,METTL4,MLL,MLL3,MLL5,MPHOSPH8,MTR,N6AMT1,N6AMT2,NSD1,NSUN2,PCMT1,PICK1,PIWIL2,PIWIL4,PRDM5,PRMT1,PRMT3,PRMT5,PRMT6,PRMT7,PRMT8,RAB3D,RAB6A,RBBP5,SATB1,SETD1B,SETD2,SUV39H1,SUV39H2,SUV420H1,SUV420H2,SUZ12…
GO Biological Process	protein catabolic process	3.67303e-07	7.19483e-05	1.2651	324.084	410	2546	149	229	345	ACR,ADAM17,AFG3L2,AMFR,ANAPC1,ANAPC4,ANAPC7,ATE1,BACE2,BUB3,C10orf46,CD2AP,CDC2,CDC27,CLN6,CRBN,CUL1,CUL3,CUL4B,DDB1,DERL2,DNAJB2,DTL,EDEM1,EDEM3,ERLEC1,ERLIN1,ERLIN2,FAF1,FBXL12,FBXL4,FBXL5,FBXL7,FBXO11,FBXO21,FBXO31,FBXO45,FBXO8,FBXW11,FBXW7,GZMB,ITCH,JKAMP,KCTD13,KIAA0368,KIAA0391,LNPEP,LNX1,MAD2L1,MAP3K1,MDM2,MYLIP,NEDD4,NFKB1,P2RX7,PARK2,PCBP2,PCNP,PCSK9,PLG,PLGLB1,PPP2R5C,PRKCQ,PSEN2,PSMA1,…	ACR,ADAM10,ADAM17,ADAM19,ADAM9,AFG3L2,AMFR,ANAPC1,ANAPC4,ANAPC5,ANAPC7,APH1A,APH1B,ARIH1,ARRB1,ARRB2,ATE1,BACE2,BTRC,BUB3,C10orf46,C7orf25,CD2AP,CDC2,CDC23,CDC27,CLN5,CLN6,CPA2,CRBN,CUL1,CUL3,CUL4B,CYLD,DDB1,DERL1,DERL2,DNAJB2,DTL,EDEM1,EDEM3,ERLEC1,ERLIN1,ERLIN2,FAF1,FBXL12,FBXL4,FBXL5,FBXL7,FBXO11,FBXO2,FBXO21,FBXO31,FBXO4,FBXO45,FBXO7,FBXO8,FBXW11,FBXW4,FBXW7,GABBR1,GZMB,HDAC6,IDE,ITCH,JKAMP,K…
GO Biological Process	mitotic cell cycle checkpoint	5.06406e-07	9.19938e-05	1.76644	43.0245	76	338	23	31	53	APC,ATM,BUB1,C15orf42,CCND1,CCNG1,CDC2,CDKN1A,CDKN2B,CENPE,DLG1,FBXO31,KNTC1,MAD2L1,NBN,PPP2R5C,RB1,RPL24,RPS27L,TERF1,TRRAP,TTK,ZWINT	APC,ATM,BUB1,C15orf42,CCNA2,CCND1,CCNG1,CDC2,CDKN1A,CDKN2B,CENPE,DGKZ,DLG1,FBXO31,FOXO4,KNTC1,MAD2L1,MAD2L2,NBN,PCBP4,PPP2R5C,PSMG2,RB1,RPL24,RPS27L,RPS6,TERF1,TRRAP,TTK,ZW10,ZWINT
GO Biological Process	Golgi organization	6.35894e-07	0.000110068	2.33732	15.4023	36	121	12	17	23	ATL2,BHLHA15,C11orf73,CIT,COG2,DYNC2H1,GOLGB1,GORASP1,GORASP2,KIFC3,OPTN,SEC23IP	ATL2,BHLHA15,C11orf73,CIT,COG2,COG4,DYNC2H1,GCC2,GOLGA5,GOLGB1,GORASP1,GORASP2,KIFC3,MAP2K1,OPTN,SEC23IP,SYNE1
GO Biological Process	spermatid development	8.93334e-07	0.000142527	1.68064	51.1711	86	402	25	41	56	ADAD1,AGFG1,ALMS1,BBS2,CEP57,DMC1,FNDC3A,HMGB2,HOOK1,HSPA2,KIT,MEI1,NEURL,OCA2,PAFAH1B1,PIWIL1,PRM1,RNF17,ROS1,SPAG6,SPO11,SYCP3,TNP1,TSSK6,UBE2B	ADAD1,AFF4,AGFG1,ALMS1,BBS2,BBS4,CAPZA3,CEP57,CUGBP1,DDX25,DHH,DLD,DMC1,FNDC3A,HMGB2,HOOK1,HSPA2,KIT,MEI1,MKKS,NEURL,NME5,OCA2,PAFAH1B1,PEBP1,PIWIL1,PRM1,RNF17,ROS1,SPAG6,SPANXB2,SPANXB2,SPO11,STRBP,SYCP3,TBPL1,TNP1,TSSK6,TXNDC8,UBE2B,YBX2
GO Biological Process	pentose metabolic process	1.20464e-06	0.000184187	2.81409	8.52852	24	67	6	7	14	KIF1B,NUDT5,OTOG,PGD,PGLS,PYGL	KIF1B,NUDT5,OTOG,PGD,PGLS,PYGL,RBKS
GO Biological Process	sensory perception of smell	1.22388e-06	0.000184564	1.69079	48.498	82	381	39	78	395	CNGB1,DRD2,GNAL,GNAS,GRM7,GRM8,OR10G2,OR10J1,OR11H4,OR13C9,OR13H1,OR1D4,OR2C1,OR2K2,OR2S2,OR4E2,OR51E2,OR51F1,OR51F2,OR51T1,OR52D1,OR52I2,OR52K1,OR52K2,OR52R1,OR56B4,OR6S1,OR7C2,OR8B12,OR8B4,OR8B8,OR8S1,OR9A2,OR9I1,OR9Q2,PDE1C,SLC6A3,UBR3,X64983	ADCY3,B3GNT2,BBS4,BEST2,CNGA2,CNGB1,DRD2,GNAL,GNAS,GRM7,GRM8,MKKS,OR10A7,OR10G2,OR10G3,OR10G7,OR10J1,OR10J3,OR11H4,OR11H6,OR13C5,OR13C8,OR13C9,OR13D1,OR13F1,OR13H1,OR1D4,OR1Q1,OR1S2,OR2AT4,OR2C1,OR2K2,OR2S2,OR4B1,OR4D11,OR4E2,OR51D1,OR51E2,OR51F1,OR51F2,OR51I2,OR51L1,OR51M1,OR51Q1,OR51S1,OR51T1,OR51V1,OR52B2,OR52D1,OR52E2,OR52E4,OR52H1,OR52I2,OR52K1,OR52K2,OR52R1,OR52W1,OR56A1,OR56B4,OR5AK2,OR6K3…
GO Biological Process	carboxylic acid catabolic process	1.23176e-06	0.000184741	1.48087	95.2139	141	748	43	66	116	ACADL,ACADS,ACOX2,ACOX3,AKR1D1,ALDH4A1,AUH,BCKDHB,BDH2,C14orf126,C9orf4,CDO1,CYP39A1,DBH,DDAH1,DECR1,EHHADH,FRRS1,GAD1,GAD2,GLDC,GLUD1,GLUD2,GOT1,GOT2,GSTZ1,HADHA,HAO1,HPD,HSD17B4,KMO,KYNU,LEP,LPIN1,MCCC1,MOXD1,MTHFD1,NOS1,NOS2,PAH,PRODH2,SARDH,SLC27A4	AASS,ABCD1,ACADL,ACADM,ACADS,ACOT7,ACOX2,ACOX3,ACOXL,ADIPOQ,AKR1D1,ALDH4A1,ALDH6A1,AUH,BCKDHB,BDH2,C14orf126,C9orf4,C9orf6,CDO1,CPT1A,CPT1B,CYP39A1,DBH,DDAH1,DDO,DECR1,DTD1,EHHADH,FAH,FRRS1,GAD1,GAD2,GLDC,GLS,GLUD1,GLUD2,GOT1,GOT2,GSTZ1,HADHA,HAO1,HAO2,HDC,HGD,HPD,HSD17B4,IDO2,KMO,KYNU,LEP,LPIN1,MCCC1,MCCC2,MOXD1,MTHFD1,NOS1,NOS2,NOS3,PAH,PEX7,PON1,PPARD,PRODH2,SARDH,SLC27A4
GO Biological Process	ncRNA metabolic process	2.43315e-06	0.000326653	1.39542	129.71	181	1019	74	131	243	AARS,AARS2,ADAT2,AIMP1,ALG9,C18orf22,C1D,C1orf25,DARS2,DIS3,DKC1,EIF4A3,ELAC1,ELAC2,EPRS,ERN2,EXOSC2,EXOSC7,EXOSC9,FARS2,FARSB,GSTCD,HSD17B10,INTS10,INTS12,INTS3,KIAA0391,KRR1,LARS2,LSM6,MAEL,MKI67IP,NAF1,NARS2,NOP56,NSA2,NSUN2,PIWIL1,PIWIL4,POP1,POP4,POP5,QTRTD1,RG9MTD1,RNASEN,RPL5,RPP25,RPP40,RPS24,RRP1B,RRP8,RRP9,SUV39H1,TARS,TDRD9,TFB2M,TRIM39,TRIT1,TRMT12,TRMT5,TRNT1,TRUB1,TSEN15,TSEN2,TSR2,…	AARS,AARS2,ADAT2,AIMP1,ALG9,ALKBH8,ASZ1,C18orf22,C1D,C1orf25,CARS,CDKN2A,DARS,DARS2,DEDD2,DIMT1L,DIS3,DKC1,DUS4L,EARS2,EIF4A3,ELAC1,ELAC2,EPRS,ERN2,EXOSC10,EXOSC2,EXOSC7,EXOSC9,FARS2,FARSB,FRG1,FTSJ1,GARS,GSTCD,GTPBP3,HEATR1,HSD17B10,INTS10,INTS12,INTS2,INTS3,INTS6,INTS9,KIAA0391,KRR1,LARS,LARS2,LIN28,LIN28B,LSM6,MAEL,MKI67IP,MOCS3,NAF1,NARS,NARS2,NHP2,NOP2,NOP56,NOP58,NPM3,NSA2,NSUN2,PARS2,PIN4,…
GO Biological Process	microtubule-based process	3.59143e-06	0.000450302	1.27048	257.383	327	2022	118	183	256	APBA1,APP,BBS2,BRCA2,BUB3,CAV1,CDC42BPA,CENPE,CENPJ,CEP120,CEP135,CEP192,CEP250,CETN3,CKAP5,CLASP1,CNP,CNTROB,CRYAA,CTNNB1,DAG1,DISC1,DNAH11,DNAH14,DNAH17,DNAH5,DNAH6,DNAH8,DNAH9,DNAL4,DNHD1,DOCK7,DYNC1I1,DYNC1I2,DYNC2H1,DYNLL2,DYNLRB1,DYNLRB2,EML4,FGFR1OP,FMN2,HAUS4,HDAC3,HOOK3,HTT,KATNA1,KATNB1,KIAA1543,KIF11,KIF13A,KIF13B,KIF15,KIF16B,KIF18A,KIF1A,KIF1B,KIF20B,KIF21A,KIF25,KIF26A,KIF26B,KIF2A,…	ACTR10,APBA1,APP,BBS2,BBS4,BLOC1S2,BRCA1,BRCA2,BUB3,C16orf63,CAV1,CCDC105,CCDC99,CDC42BPA,CENPE,CENPJ,CEP120,CEP135,CEP192,CEP250,CETN3,CKAP5,CLASP1,CNP,CNTROB,CRYAA,CRYAB,CTNNB1,DAG1,DCTN2,DISC1,DNAH1,DNAH11,DNAH14,DNAH17,DNAH2,DNAH3,DNAH5,DNAH6,DNAH7,DNAH8,DNAH9,DNAL4,DNEL2,DNHD1,DOCK7,DYNC1H1,DYNC1I1,DYNC1I2,DYNC2H1,DYNLL1,DYNLL2,DYNLRB1,DYNLRB2,EML4,FBXO5,FGFR1OP,FMN2,GADD45A,HAUS1,HAUS2,HAUS…
GO Biological Process	mRNA transport	4.59775e-06	0.000543077	1.54992	65.8096	102	517	34	59	88	AGFG1,AHCTF1,DDX19B,DDX39,EIF4A3,FMR1,GLE1,HHEX,MVP,NCBP1,NCBP2,NUP133,NUP155,NUP210,NUP214,NUP35,NUP50,NUP85,NUP88,NUP93,QKI,RANBP17,RANBP2,SEH1L,SENP2,SMG5,SMG6,SMG7,THOC1,THOC2,THOC3,TNKS,UPF2,XPO1	AGFG1,AHCTF1,CASC3,DDX19B,DDX25,DDX39,EIF4A3,EIF5A,EIF5A2,EIF5AL1,ENY2,FMR1,G3BP2,GLE1,HHEX,HNRNPA1,KHSRP,LRPPRC,MAGOH,MVP,MYO1C,NCBP1,NCBP2,NUP107,NUP133,NUP153,NUP155,NUP160,NUP205,NUP210,NUP214,NUP35,NUP37,NUP50,NUP54,NUP85,NUP88,NUP93,NUPL2,NXF1,PABPN1,QKI,RANBP17,RANBP2,RBM8A,SEH1L,SENP2,SMG5,SMG6,SMG7,THOC1,THOC2,THOC3,TNKS,UPF1,UPF2,UPF3B,XPO1,XPO7
GO Biological Process	drug transport	6.21276e-06	0.000685309	4.09878	2.9277	12	23	5	8	13	HIAT1,SLC22A5,SLC47A1,SLC47A2,TLR2	HIAT1,MFSD9,NR1I2,SLC15A2,SLC22A5,SLC47A1,SLC47A2,TLR2
GO Biological Process	positive regulation of lyase activity	1.08807e-05	0.00108301	1.41505	102.47	145	805	37	56	66	ACR,ADCY2,ADCY5,ADCY6,ADCY7,ADCY8,ADCY9,ADCYAP1,ADCYAP1R1,ADORA2A,ADORA2A,ADORA3,ADRB1,ADRB2,CALCA,CALCR,CALCRL,CRHR1,DRD1,FSHR,FTMT,GALR1,GHRH,GLP1R,GNAL,GNAS,GPR26,GPR78,HTR4,HTR7,LHCGR,NTRK2,OPRM1,RXFP1,RXFP2,TSHR,VIPR2	ACR,ADCY2,ADCY3,ADCY5,ADCY6,ADCY7,ADCY8,ADCY9,ADCYAP1,ADCYAP1R1,ADORA2A,ADORA2A,ADORA2B,ADORA3,ADRB1,ADRB2,AVPR2,CALCA,CALCR,CALCRL,CAP1,CAP2,CRHR1,DRD1,DRD3,DRD5,EDNRA,FSHR,FTMT,GALR1,GCGR,GHRH,GHRHR,GHRHR,GIPR,GLP1R,GNAL,GNAQ,GNAS,GNAS,GPR26,GPR3,GPR78,HTR4,HTR7,LHCGR,NF1,NOS3,NTRK1,NTRK2,OPRM1,PPAN-P2RY11,RXFP1,RXFP2,TSHR,VIPR2
GO Biological Process	DNA packaging	1.32699e-05	0.00127472	1.57863	53.8443	85	423	38	56	158	AIFM2,AKAP8,ASF1A,ASH1L,CDC2,CENPV,DFFB,H1F0,H1FX,H2AFB3,H2AFY2,H2AFZ,H3F3B,H3F3C,HIST1H1C,HIST1H2AA,HIST1H2BA,HIST1H4C,HIST1H4H,HIST2H2BF,HJURP,HMGB2,HP1BP3,MYST3,MYST4,NAP1L1,NAP1L5,NCAPG,NCAPG2,POLS,PRM1,SMC2,STRA8,SYCP3,TSPYL4,TSPYL6,TSSK6,TTN	ACIN1,AIFM1,AIFM2,AKAP8,ASF1A,ASF1B,ASH1L,BAHD1,CDC2,CENPV,CTCF,DFFB,H1F0,H1FX,H2AFB3,H2AFY,H2AFY2,H2AFZ,H3F3B,H3F3B,H3F3C,HAT1,HIST1H1C,HIST1H1D,HIST1H1E,HIST1H2AA,HIST1H2BA,HIST1H2BJ,HIST1H4C,HIST1H4H,HIST2H2BF,HJURP,HMGB2,HP1BP3,MYST3,MYST4,NAP1L1,NAP1L4,NAP1L5,NCAPG,NCAPG2,PAM,POLS,PRM1,RSF1,SHPRH,SMARCA5,SMC2,STRA8,SYCP3,TSPYL2,TSPYL4,TSPYL5,TSPYL6,TSSK6,TTN
GO Biological Process	positive regulation of cyclase activity	1.84336e-05	0.00164182	1.40426	101.833	143	800	36	55	64	ACR,ADCY2,ADCY5,ADCY6,ADCY7,ADCY8,ADCY9,ADCYAP1,ADCYAP1R1,ADORA2A,ADORA2A,ADORA3,ADRB1,ADRB2,CALCA,CALCR,CALCRL,CRHR1,DRD1,FSHR,GALR1,GHRH,GLP1R,GNAL,GNAS,GPR26,GPR78,HTR4,HTR7,LHCGR,NTRK2,OPRM1,RXFP1,RXFP2,TSHR,VIPR2	ACR,ADCY2,ADCY3,ADCY5,ADCY6,ADCY7,ADCY8,ADCY9,ADCYAP1,ADCYAP1R1,ADORA2A,ADORA2A,ADORA2B,ADORA3,ADRB1,ADRB2,AVPR2,CALCA,CALCR,CALCRL,CAP1,CAP2,CRHR1,DRD1,DRD3,DRD5,EDNRA,FSHR,GALR1,GCGR,GHRH,GHRHR,GHRHR,GIPR,GLP1R,GNAL,GNAQ,GNAS,GNAS,GPR26,GPR3,GPR78,HTR4,HTR7,LHCGR,NF1,NOS3,NTRK1,NTRK2,OPRM1,PPAN-P2RY11,RXFP1,RXFP2,TSHR,VIPR2
GO Biological Process	nucleoside diphosphate catabolic process	2.11929e-05	0.00183416	4.71359	1.90937	9	15	3	3	6	ENTPD1,ENTPD3,NUDT5	ENTPD1,ENTPD3,NUDT5
GO Biological Process	response to unfolded protein	2.26618e-05	0.00193092	1.60545	46.7159	75	367	29	45	69	AARS,AMFR,ATF6,CCND1,CREB3L1,DERL2,DNAJB2,DNAJB6,DNAJC3,EDEM1,EDEM2,EDEM3,EIF2AK3,ERN1,ERP44,FAF2,HERPUD2,HSP90AA1,HSPA2,HSPA4,HSPA4L,HSPA6,HSPB1,HSPH1,JKAMP,MANF,SERPINH1,UBXN4,VAPB	AARS,AMFR,ATF6,CCND1,CHAC1,CREB3L1,CREB3L2,DDIT3,DERL1,DERL2,DNAJA1,DNAJB2,DNAJB4,DNAJB5,DNAJB6,DNAJC3,EDEM1,EDEM2,EDEM3,EIF2AK3,EIF2AK4,ERN1,ERO1L,ERP44,FAF2,HERPUD1,HERPUD2,HSP90AA1,HSPA1A,HSPA2,HSPA4,HSPA4L,HSPA6,HSPA8,HSPB1,HSPB2,HSPH1,IFNG,JKAMP,MANF,NFE2L2,SELS,SERPINH1,UBXN4,VAPB
GO Biological Process	steroid catabolic process	2.39104e-05	0.00202789	2.21188	13.111	29	103	10	13	23	AKR1D1,CYP39A1,CYP46A1,CYP7A1,HSD17B6,SCARB1,SRD5A2,STS,TRERF1,YWHAH	AKR1D1,CYP24A1,CYP27B1,CYP39A1,CYP46A1,CYP7A1,FGF23,HSD17B6,SCARB1,SRD5A2,STS,TRERF1,YWHAH
GO Biological Process	somatic recombination of immunoglobulin gene segments	2.92187e-05	0.00238973	2.44173	9.41956	23	74	9	12	17	AICDA,CD40LG,EXO1,LIG4,MLH1,MSH6,NBN,PMS2L3,UNG	AICDA,CD40LG,ERCC1,EXO1,LIG4,MLH1,MSH6,NBN,PMS2L3,SWAP70,UNG,XRCC4
GO Biological Process	response to protozoan	3.06318e-05	0.00248683	3.62584	3.30958	12	26	3	4	6	BCL3,CLEC7A,LYST	BCL3,CLEC7A,IL6,LYST
GO Biological Process	phosphoinositide dephosphorylation	4.55981e-05	0.00340089	5.49919	1.27291	7	10	3	3	5	OCRL,SACM1L,SYNJ2	OCRL,SACM1L,SYNJ2
GO Biological Process	organic alcohol transport	5.00958e-05	0.00362819	1.85366	22.6579	42	178	15	19	25	AQP9,CHRM5,CRYM,DRD1,FAM188B,HIAT1,MECP2,PARK2,PARK7,PGAP1,SLC22A3,SLC44A1,SLC5A3,SLC6A2,SLC6A3	AQP9,CHRM5,CRYM,DRD1,FAM188B,HIAT1,MECP2,MFSD9,PARK2,PARK7,PGAP1,PSEN1,SLC22A3,SLC44A1,SLC44A2,SLC5A3,SLC5A7,SLC6A2,SLC6A3
GO Biological Process	regulation of gene expression by genetic imprinting	5.87474e-05	0.00414568	2.3466	9.80144	23	77	7	10	13	CTCFL,DNMT3A,DNMT3B,EED,IGF2,KCNQ1,MECP2	CTCF,CTCFL,DIRAS3,DNMT3A,DNMT3B,EED,IGF2,KCNQ1,MECP2,PRMT7
GO Biological Process	induction of apoptosis by extracellular signals	6.07869e-05	0.00427317	1.36306	108.579	148	853	57	81	114	AATF,ADORA2A,ADORA2A,ARHGEF11,ARHGEF12,ARHGEF17,ARHGEF18,ARHGEF2,ARHGEF3,ARHGEF6,ARHGEF7,BCL2L11,BID,CASP3,CD28,CD38,CD5,CRADD,CRH,DAP,DAPK1,DEDD,DIABLO,ECT2,FADD,FASLG,FGD2,FGD4,ITGB3BP,ITSN1,KALRN,KIAA1112,MAP3K5,MAPK9,MCF2L,NET1,NGEF,NGF,PREX1,PRKCA,PSEN2,RASGRF1,RASGRF2,RYR2,SORT1,SOS1,SOS2,SQSTM1,SST,TIAM1,TIAM2,TM2D1,TRIO,VAV1,VAV2,VAV3,YJEFN3	AATF,ADORA1,ADORA2A,ADORA2A,AKAP13,APH1A,APH1B,ARHGAP4,ARHGEF11,ARHGEF12,ARHGEF16,ARHGEF17,ARHGEF18,ARHGEF2,ARHGEF3,ARHGEF6,ARHGEF7,BCL2L11,BID,BTK,CASP3,CD28,CD38,CD5,CRADD,CRH,DAP,DAPK1,DAXX,DEDD,DEDD2,DIABLO,DPF2,ECT2,FADD,FASLG,FGD1,FGD2,FGD4,ITGB3BP,ITSN1,KALRN,KIAA1112,MAP3K5,MAPK8,MAPK9,MCF2,MCF2L,NCSTN,NET1,NGEF,NGF,NGFR,PLEKHG5,PREX1,PRKCA,PSEN1,PSEN2,RAC1,RASGRF1,RASGRF2,RYR2,SENP1,SORT…
GO Biological Process	response to purine	6.19145e-05	0.00434689	1.80976	24.3127	44	191	10	13	14	ADORA2A,ADORA2A,BCL2,CCNE1,GNAL,PPARG,PRKAA2,RYR1,RYR2,SLC6A1	ADORA2A,ADORA2A,BCL2,CCNE1,CHEK1,GNAL,IL6,PPARG,PRKAA2,RYR1,RYR2,SDC2,SLC6A1
GO Biological Process	DNA conformation change	6.55396e-05	0.00454345	1.45856	69.2465	101	544	48	67	179	AIFM2,AKAP8,ASF1A,ASH1L,CDC2,CENPV,DFFB,ERCC3,H1F0,H1FX,H2AFB3,H2AFY2,H2AFZ,H3F3B,H3F3C,HHEX,HIST1H1C,HIST1H2AA,HIST1H2BA,HIST1H4C,HIST1H4H,HIST2H2BF,HJURP,HMGA1,HMGB1,HMGB2,HP1BP3,MRE11A,MYST3,MYST4,NAP1L1,NAP1L5,NBN,NCAPG,NCAPG2,POLS,POT1,PRM1,SMC2,STRA8,SYCP3,TOP1,TOP2B,TOP3B,TSPYL4,TSPYL6,TSSK6,TTN	ACIN1,AIFM1,AIFM2,AKAP8,ASF1A,ASF1B,ASH1L,BAHD1,CDC2,CENPV,CTCF,DFFB,ERCC3,H1F0,H1FX,H2AFB3,H2AFY,H2AFY2,H2AFZ,H3F3B,H3F3B,H3F3C,HAT1,HHEX,HIST1H1C,HIST1H1D,HIST1H1E,HIST1H2AA,HIST1H2BA,HIST1H2BJ,HIST1H4C,HIST1H4H,HIST2H2BF,HJURP,HMGA1,HMGB1,HMGB2,HP1BP3,MRE11A,MYST3,MYST4,NAP1L1,NAP1L4,NAP1L5,NBN,NCAPG,NCAPG2,PAM,POLS,POT1,PRM1,PURA,RSF1,SHPRH,SMARCA5,SMC2,STRA8,SYCP3,TOP1,TOP2B,TOP3B,TSPYL2,TSP…
GO Biological Process	organelle fission	7.92715e-05	0.00525071	1.23128	247.709	305	1946	103	168	245	AKAP8,ANAPC1,ANAPC4,ANAPC7,APC,ARHGEF2,BUB1,BUB3,C13orf34,C14orf106,CCNB2,CCNG1,CCNK,CD2AP,CDC2,CDC25A,CDC27,CENPE,CENPV,CETN3,CIT,CKAP5,CLASP1,CLASP2,CLIP1,CLTC,CLTCL1,COX10,CSNK1A1,CUL3,DDX11,DLGAP5,DSN1,EML4,HAUS4,HGF,HORMAD2,INCENP,KATNA1,KATNB1,KIAA0892,KIAA1009,KIF11,KIF15,KIF18A,KIF20B,KIF25,KIF2A,KIF2B,KLHL13,KLHL21,KNTC1,LATS1,LATS2,LRRCC1,MAD2L1,MAP9,MAPRE2,MAPRE3,MUL1,NCAPG,NCAPG2,NDC8…	AKAP8,ANAPC1,ANAPC13,ANAPC4,ANAPC5,ANAPC7,ANLN,APC,ARHGEF2,BOD1,BUB1,BUB3,C10orf104,C13orf34,C14orf106,C21orf45,C7orf11,CCDC99,CCNA1,CCNA2,CCNB2,CCNG1,CCNG2,CCNK,CD2AP,CDC2,CDC23,CDC25A,CDC25C,CDC27,CDC6,CDCA2,CDCA8,CENPE,CENPV,CEP164,CETN1,CETN3,CIT,CKAP5,CLASP1,CLASP2,CLIP1,CLTC,CLTCL1,COX10,CSNK1A1,CUL3,DCLRE1A,DCTN1,DCTN2,DDX11,DLGAP5,DNM1L,DSN1,DYNC1LI1,EML4,ERCC6L,FAM83D,FBXO5,FIS1,HAUS1,HA…
GO Biological Process	regulation of lyase activity	8.93607e-05	0.00577989	1.28941	158.987	205	1249	59	88	111	ACR,ADCY2,ADCY5,ADCY6,ADCY7,ADCY8,ADCY9,ADCYAP1,ADCYAP1R1,ADORA2A,ADORA2A,ADORA3,ADRA2A,ADRB1,ADRB2,CALCA,CALCR,CALCRL,CHRM5,CORT,CRHR1,DRD1,DRD2,EDNRB,FSHR,FTMT,GABBR2,GALR1,GHRH,GLP1R,GNAI1,GNAI2,GNAI3,GNAL,GNAS,GPR26,GPR78,GRM2,GRM3,GRM7,GRM8,HRH3,HTR4,HTR7,LHCGR,NPR3,NPY1R,NPY2R,NTRK2,OPRD1,OPRK1,OPRL1,OPRM1,RGS1,RXFP1,RXFP2,S1PR1,TSHR,VIPR2	ACR,ADCY2,ADCY3,ADCY5,ADCY6,ADCY7,ADCY8,ADCY9,ADCYAP1,ADCYAP1R1,ADORA1,ADORA2A,ADORA2A,ADORA2B,ADORA3,ADRA2A,ADRB1,ADRB2,AVPR2,CALCA,CALCR,CALCRL,CAP1,CAP2,CHRM4,CHRM5,CORT,CRHR1,DRD1,DRD2,DRD3,DRD5,EDNRA,EDNRB,FLNA,FSHR,FTMT,GABBR1,GABBR2,GALR1,GALR3,GCGR,GHRH,GHRHR,GHRHR,GIPR,GLP1R,GNAI1,GNAI2,GNAI3,GNAL,GNAQ,GNAS,GNAS,GNAZ,GPR26,GPR3,GPR44,GPR78,GRM2,GRM3,GRM4,GRM7,GRM8,HRH3,HTR1A,HTR4,HTR7,LH…
GO Biological Process	endoplasmic reticulum organization	8.98119e-05	0.00579545	2.67104	6.36457	17	50	7	9	12	ATL1,ATL2,BNIP1,CAV2,DOPEY1,EIF2AK3,HTT	ATL1,ATL2,ATL3,BNIP1,CAV2,COL4A3BP,DOPEY1,EIF2AK3,HTT
GO Biological Process	cyclic-nucleotide-mediated signaling	9.98437e-05	0.00624511	1.2687	180.499	229	1418	72	109	141	ADCY2,ADCY5,ADCY6,ADCY7,ADCY8,ADCY9,ADCYAP1R1,ADM,ADORA2A,ADORA2A,ADRA1B,ADRA1D,ADRA2A,ADRB1,ADRB2,CACNA1D,CALCR,CALCRL,CHRM2,CHRM5,CORT,CRHR1,CRHR2,DRD1,DRD2,EIF4EBP2,FSHR,FZD2,GALR1,GCG,GHRH,GLP1R,GNAI1,GNAI2,GNAL,GNAS,GPR26,GPR78,HRH2,HRH3,HTR1B,HTR1F,HTR4,HTR5A,HTR7,LHCGR,MC3R,MC4R,MC5R,MTNR1B,NOS2,NPR3,NPY,NPY1R,NPY2R,NUDT4,OPRD1,OPRK1,OPRL1,OPRM1,PCLO,PDE7A,PDE9A,PTH1R,RAPGEF2,RAPGEF4,RGS1,…	ADCY2,ADCY3,ADCY5,ADCY6,ADCY7,ADCY8,ADCY9,ADCYAP1R1,ADM,ADORA1,ADORA2A,ADORA2A,ADORA2B,ADRA1B,ADRA1D,ADRA2A,ADRB1,ADRB2,AGT,AVPR2,CACNA1D,CALCR,CALCRL,CD36,CHRM2,CHRM4,CHRM5,CNR1,CORT,CRHR1,CRHR2,DRD1,DRD2,DRD3,DRD5,EIF4EBP2,FLNA,FSHR,FZD2,GALR1,GCG,GCGR,GHRH,GHRHR,GHRHR,GIPR,GLP1R,GLP2R,GNAI1,GNAI2,GNAL,GNAQ,GNAS,GNAS,GNAZ,GPR26,GPR3,GPR44,GPR78,GRK5,GRM4,HRH2,HRH3,HTR1A,HTR1B,HTR1D,HTR1F,HTR4,H…
GO Biological Process	positive regulation of vasoconstriction	0.000101421	0.00631506	1.93553	17.5662	34	138	13	18	21	ADRA1A,AVPR1A,AX746903,CAV1,CD38,DBH,HTR2A,NPY1R,PDE5A,PTGS1,SHC1,TACR1,TBXAS1	ADRA1A,ALOX5,AVP,AVPR1A,AX746903,CAV1,CD38,DBH,F2R,HTR2A,NPY1R,PDE5A,PTGS1,PTGS2,SHC1,SMTNL1,TACR1,TBXAS1
GO Biological Process	associative learning	0.000102926	0.00636554	1.39034	88.4675	123	695	27	33	42	ADAM2,ADRA1B,APBB1,APP,ATP1A3,ATXN1,CHRFAM7A,CHRNA7,CHRNB2,CRHR1,DBH,DRD1,DRD2,FOS,GABRA5,GRIN2A,GRIN2B,GRM7,HMGCR,HTT,KIT,MECP2,NETO1,NEUROD2,PDE1B,TAC1,TACR1	ADAM2,ADRA1B,APBB1,APP,ATP1A2,ATP1A3,ATXN1,CHRFAM7A,CHRNA7,CHRNB2,CRHR1,DBH,DRD1,DRD2,DRD3,DRD5,FOS,GABRA5,GRIN1,GRIN2A,GRIN2B,GRM7,HMGCR,HTT,KIT,MECP2,NETO1,NEUROD2,NF1,NLGN3,PDE1B,TAC1,TACR1
GO Biological Process	nuclear envelope organization	0.000108558	0.0066689	3.09478	4.20062	13	33	5	7	11	CASP3,LMNA,NDEL1,PAFAH1B1,SYNE2	CASP3,EMD,LMNA,NDEL1,PAFAH1B1,SYNE2,ZMPSTE24
GO Biological Process	regulation of phosphoprotein phosphatase activity	0.000128485	0.00757197	1.97996	15.6568	31	123	10	12	17	DRD2,FKBP1A,JAK2,PPP1R2P3,PPP1R2P9,PPP2R4,RCAN1,SAPS1,SAPS3,TSC1	DRD2,FKBP1A,FKBP1B,JAK2,PPP1R2,PPP1R2P3,PPP1R2P9,PPP2R4,RCAN1,SAPS1,SAPS3,TSC1
GO Biological Process	regulation of cyclase activity	0.000133284	0.00780464	1.28197	158.351	203	1244	58	87	109	ACR,ADCY2,ADCY5,ADCY6,ADCY7,ADCY8,ADCY9,ADCYAP1,ADCYAP1R1,ADORA2A,ADORA2A,ADORA3,ADRA2A,ADRB1,ADRB2,CALCA,CALCR,CALCRL,CHRM5,CORT,CRHR1,DRD1,DRD2,EDNRB,FSHR,GABBR2,GALR1,GHRH,GLP1R,GNAI1,GNAI2,GNAI3,GNAL,GNAS,GPR26,GPR78,GRM2,GRM3,GRM7,GRM8,HRH3,HTR4,HTR7,LHCGR,NPR3,NPY1R,NPY2R,NTRK2,OPRD1,OPRK1,OPRL1,OPRM1,RGS1,RXFP1,RXFP2,S1PR1,TSHR,VIPR2	ACR,ADCY2,ADCY3,ADCY5,ADCY6,ADCY7,ADCY8,ADCY9,ADCYAP1,ADCYAP1R1,ADORA1,ADORA2A,ADORA2A,ADORA2B,ADORA3,ADRA2A,ADRB1,ADRB2,AVPR2,CALCA,CALCR,CALCRL,CAP1,CAP2,CHRM4,CHRM5,CORT,CRHR1,DRD1,DRD2,DRD3,DRD5,EDNRA,EDNRB,FLNA,FSHR,GABBR1,GABBR2,GALR1,GALR3,GCGR,GHRH,GHRHR,GHRHR,GIPR,GLP1R,GNAI1,GNAI2,GNAI3,GNAL,GNAQ,GNAS,GNAS,GNAZ,GPR26,GPR3,GPR44,GPR78,GRM2,GRM3,GRM4,GRM7,GRM8,HRH3,HTR1A,HTR4,HTR7,LHCGR,N…
GO Biological Process	alcohol catabolic process	0.000135062	0.00787524	1.47837	58.1722	86	457	31	45	86	ADH4,ADH7,ADPGK,ALDOB,C10orf134,COMT,DBH,ENO2,FUT10,FUT8,FUT9,GPD1L,GPI,H6PD,HIBADH,HK1,HK3,KIF1B,LRTOMT,MAOA,MDH1,NUDT5,OGDHL,PDHA1,PDHA2,PFKFB1,PFKP,PGD,PGLS,PGM1,SLC6A3	ADH4,ADH7,ADPGK,ALDOA,ALDOB,BPGM,C10orf134,COMT,DBH,ENO2,FUT10,FUT8,FUT9,GLYR1,GNPDA1,GPD1,GPD1L,GPI,H6PD,HIBADH,HK1,HK2,HK3,KIF1B,LDHA,LDHAL6A,LDHAL6B,LRTOMT,MAOA,MDH1,NUDT3,NUDT5,OGDHL,PDHA1,PDHA2,PDHB,PFKFB1,PFKP,PGD,PGLS,PGM1,PKM2,SLC6A3,SRD5A3,UEVLD
GO Biological Process	peptidyl-citrulline biosynthetic process from peptidyl-arginine	0.000179181	0.00996229	6.54666	0.763748	5	6	4	4	5	PADI2,PADI3,PADI4,PADI6	PADI2,PADI3,PADI4,PADI6
Disease Ontology	Down's syndrome	7.07261e-07	0.000121277	1.49998	92.6681	139	728	40	55	76	ABCG1,ADAMTS1,APP,AQP4,ARPP19,ARSA,BACH1,CA2,CASP3,CHRNA4,CHRNA7,CHRNB2,DYRK1A,EDNRB,ERG,ESR1,GATA1,GDI2,GNB2L1,HINT1,ITSN1,JAK2,KCNJ15,KCNJ6,LEP,MAOA,MAPT,MTHFD1L,MTR,MTRR,NCAM1,PAK1,PKNOX1,RBM14,RFC1,RUNX1,SIM2,SNAP25,STMN1,TPTE	ABCG1,ADAMTS1,APP,AQP4,ARPP19,ARSA,BACH1,CA2,CASP3,CHRNA4,CHRNA7,CHRNB2,DYRK1A,EDNRB,ENSA,ERF,ERG,ESR1,FABP3,GATA1,GDI2,GFAP,GNB2L1,GNLY,HINT1,HNRNPA2B1,IL2RA,IL6,ITSN1,JAK2,KCNJ15,KCNJ6,LEP,MAOA,MAPT,MATR3,MTHFD1L,MTR,MTRR,NACA,NCAM1,NPAS4,PAK1,PHYHIP,PKNOX1,PRDX3,RBM14,REST,RFC1,RUNX1,SIM2,SNAP25,SOD1,STMN1,TPTE
Disease Ontology	chromosomal disease	1.08237e-06	0.000168774	1.39566	139.002	194	1092	51	67	92	ABCG1,ADAMTS1,APP,AQP4,ARPP19,ARSA,BACH1,CA2,CASP3,CHRNA4,CHRNA7,CHRNB2,DYRK1A,EDNRB,ELN,ERG,ESR1,FGF9,FGFR1,FGFR3,GATA1,GDI2,GNB2L1,HINT1,HSPB1,INHBA,ITSN1,JAK2,KCNJ15,KCNJ6,LEP,MAOA,MAPT,MECP2,MTHFD1L,MTR,MTRR,NCAM1,NR0B1,PAK1,PCNA,PKNOX1,PLCG1,RBM14,RFC1,RUNX1,SIM2,SNAP25,STMN1,TPTE,UBE3A	ABCG1,ADAMTS1,APP,AQP4,ARPP19,ARSA,BACH1,CA2,CASP3,CHRNA4,CHRNA7,CHRNB2,DYRK1A,EDNRB,ELN,ENSA,ERF,ERG,ESR1,FABP3,FGF9,FGFR1,FGFR3,GATA1,GDI2,GFAP,GNB2L1,GNLY,HINT1,HNRNPA2B1,HSPB1,IL2RA,IL6,INHBA,ITSN1,JAK2,KCNJ15,KCNJ6,LEP,MAOA,MAPT,MATR3,MECP2,MTHFD1L,MTR,MTRR,NACA,NCAM1,NPAS4,NR0B1,PAK1,PCNA,PHYHIP,PKNOX1,PLCG1,PRDX3,RBM14,REST,RFC1,RUNX1,SIM2,SLC9A6,SNAP25,SOD1,STMN1,TPTE,UBE3A
Disease Ontology	common cold	3.90218e-06	0.000477305	2.49543	10.8198	27	85	7	13	16	ADRA2C,BRAF,KCNJ6,LPL,PARP1,ROCK1,SELP	ADRA2C,AKR1B1,BRAF,CLCN1,DHRS4,HSPA1A,KCNJ6,LPL,PARP1,ROCK1,SCN4A,SELP,TRPM8
Disease Ontology	nevus	0.000122323	0.00731055	2.80571	5.34624	15	42	8	10	18	ASIP,BRAF,CDKN1B,EGF,F2,HSP90AA1,RHCE,SKP2	ASIP,BRAF,CDKN1B,CDKN2A,EGF,F2,HSP90AA1,RHCE,RHD,SKP2
InterPro	Krueppel-associated box	1.1686e-69	6.43233e-65	3.45966	66.1915	229	520	70	87	377	AF035281,PEG3,PMS2L3,POGK,PRDM9,ZFP112,ZFP28,ZKSCAN1,ZKSCAN2,ZNF132,ZNF133,ZNF135,ZNF18,ZNF180,ZNF182,ZNF189,ZNF2,ZNF212,ZNF214,ZNF224,ZNF225,ZNF226,ZNF227,ZNF233,ZNF234,ZNF235,ZNF264,ZNF274,ZNF275,ZNF324B,ZNF334,ZNF343,ZNF350,ZNF354C,ZNF382,ZNF398,ZNF446,ZNF461,ZNF470,ZNF471,ZNF473,ZNF485,ZNF487,ZNF519,ZNF546,ZNF557,ZNF567,ZNF573,ZNF584,ZNF597,ZNF599,ZNF614,ZNF620,ZNF621,ZNF630,ZNF641,ZNF673,ZNF…	AF035281,AK130974,KIAA1954,PEG3,PMS2L3,POGK,PRDM9,ZFP112,ZFP28,ZFP92,ZKSCAN1,ZKSCAN2,ZKSCAN5,ZNF12,ZNF132,ZNF133,ZNF135,ZNF157,ZNF18,ZNF180,ZNF181,ZNF182,ZNF189,ZNF2,ZNF212,ZNF214,ZNF224,ZNF225,ZNF226,ZNF227,ZNF233,ZNF234,ZNF235,ZNF264,ZNF267,ZNF274,ZNF275,ZNF282,ZNF286A,ZNF324B,ZNF334,ZNF343,ZNF350,ZNF354C,ZNF382,ZNF398,ZNF41,ZNF436,ZNF446,ZNF461,ZNF470,ZNF471,ZNF473,ZNF483,ZNF485,ZNF487,ZNF514,…
InterPro	Major facilitator superfamily, general substrate transporter	4.23135e-15	1.37004e-11	1.85047	88.0856	163	692	61	89	136	C2orf83,CDH22,FLVCR1,FLVCR2,GRID1,HIAT1,KIAA1919,MFSD10,MFSD11,MFSD4,MFSD6L,SLC16A10,SLC16A12,SLC16A14,SLC16A4,SLC16A5,SLC16A6,SLC16A7,SLC17A1,SLC17A2,SLC17A3,SLC17A4,SLC19A3,SLC22A11,SLC22A12,SLC22A13,SLC22A15,SLC22A16,SLC22A2,SLC22A23,SLC22A3,SLC22A5,SLC22A6,SLC22A8,SLC29A4,SLC2A1,SLC2A10,SLC2A12,SLC2A13,SLC2A2,SLC2A3,SLC2A5,SLC2A7,SLC2A8,SLC2A9,SLC37A1,SLC37A2,SLC40A1,SLC43A3,SLC45A1,SLC45A3,S…	AGER,C2orf83,CDH22,DIRC2,FLVCR1,FLVCR2,GRID1,GRM4,HIAT1,KIAA1919,MFSD1,MFSD10,MFSD11,MFSD2A,MFSD4,MFSD5,MFSD6L,MFSD9,SLC15A1,SLC15A2,SLC15A3,SLC15A4,SLC16A1,SLC16A10,SLC16A12,SLC16A13,SLC16A14,SLC16A2,SLC16A4,SLC16A5,SLC16A6,SLC16A7,SLC16A9,SLC17A1,SLC17A2,SLC17A3,SLC17A4,SLC17A6,SLC17A7,SLC17A8,SLC18A2,SLC19A2,SLC19A3,SLC22A11,SLC22A12,SLC22A13,SLC22A15,SLC22A16,SLC22A2,SLC22A23,SLC22A3,SLC22A5,…
InterPro	Gamma-aminobutyric acid A receptor	3.04716e-11	2.50336e-08	2.31471	28.5133	66	224	15	20	23	GABRA1,GABRA2,GABRA3,GABRA5,GABRA6,GABRB2,GABRB3,GABRG1,GABRG2,GABRG3,GABRP,GABRQ,GABRR1,GLRA1,GLRA3	GABRA1,GABRA2,GABRA3,GABRA5,GABRA6,GABRB2,GABRB3,GABRD,GABRE,GABRG1,GABRG2,GABRG3,GABRP,GABRQ,GABRR1,GABRR3,GLRA1,GLRA2,GLRA3,GLRA4
InterPro	Neurotransmitter-gated ion-channel, conserved site	3.55966e-11	2.88138e-08	2.13273	37.0418	79	291	22	36	45	CHRFAM7A,CHRNA1,CHRNA10,CHRNA4,CHRNA7,CHRNB2,CHRNB3,GABRA1,GABRA2,GABRA3,GABRA5,GABRA6,GABRB2,GABRB3,GABRG1,GABRG2,GABRG3,GABRP,GABRQ,GABRR1,GLRA1,GLRA3	CHRFAM7A,CHRNA1,CHRNA10,CHRNA2,CHRNA4,CHRNA5,CHRNA6,CHRNA7,CHRNA9,CHRNB2,CHRNB3,CHRNB4,CHRND,CHRNG,GABRA1,GABRA2,GABRA3,GABRA5,GABRA6,GABRB2,GABRB3,GABRD,GABRE,GABRG1,GABRG2,GABRG3,GABRP,GABRQ,GABRR1,GABRR3,GLRA1,GLRA2,GLRA3,GLRA4,GLRB,HTR3A
InterPro	Crotonase, core	9.00785e-11	6.43921e-08	2.93682	13.6202	40	107	6	7	17	AUH,CDYL,CDYL2,EHHADH,HADHA,PECI	AUH,CDYL,CDYL2,ECHDC3,EHHADH,HADHA,PECI
InterPro	Pleckstrin homology-type	3.94308e-10	2.28462e-07	1.2604	510.948	644	4014	199	257	317	ACAP2,ADAP2,ADRBK1,ADRBK2,AFAP1,AFAP1L1,AGAP1,AGAP3,AKT2,AKT3,ANKS1A,ANKS1B,APBA1,APBA2,APBB1,APBB1IP,APBB2,APPL2,ARAP1,ARAP2,ARAP3,ARHGAP10,ARHGAP15,ARHGAP20,ARHGAP21,ARHGAP24,ARHGAP25,ARHGAP27,ARHGEF11,ARHGEF12,ARHGEF18,ARHGEF2,ARHGEF6,ARHGEF7,ASAP1,ASAP2,ASAP3,BMX,CADPS,CADPS2,CIT,CNKSR2,CYTH1,CYTH3,CYTH4,DAB1,DAB2,DAPP1,DGKD,DGKH,DNM2,DNM3,DOCK10,DOCK11,DOCK9,DOK2,DOK4,DOK5,DOK6,ECT2L,ELMO1,E…	ACAP2,ADAP2,ADRBK1,ADRBK2,AFAP1,AFAP1L1,AFAP1L2,AGAP1,AGAP3,AGAP6,AKAP13,AKT2,AKT3,ANKS1A,ANKS1B,ANLN,APBA1,APBA2,APBB1,APBB1IP,APBB2,APPL2,ARAP1,ARAP2,ARAP3,ARHGAP10,ARHGAP12,ARHGAP15,ARHGAP20,ARHGAP21,ARHGAP22,ARHGAP23,ARHGAP24,ARHGAP25,ARHGAP27,ARHGEF11,ARHGEF12,ARHGEF18,ARHGEF2,ARHGEF6,ARHGEF7,ASAP1,ASAP2,ASAP3,BMX,BTK,CADPS,CADPS2,CIT,CNKSR2,COL4A3BP,CYTH1,CYTH2,CYTH3,CYTH4,DAB1,DAB2,DAPP1,D…
InterPro	Olfactory receptor	8.81924e-09	3.15219e-06	2.36687	19.8575	47	156	31	65	383	OR10G2,OR10J1,OR11H4,OR13C9,OR13H1,OR1D4,OR2A9P,OR2A9P,OR2C1,OR2K2,OR2S2,OR4E2,OR51E2,OR51F1,OR51F2,OR51T1,OR52D1,OR52I2,OR52K1,OR52K2,OR52R1,OR56B4,OR6S1,OR7C2,OR8B12,OR8B4,OR8B8,OR8S1,OR9A2,OR9I1,OR9Q2	OR10A7,OR10G2,OR10G3,OR10G7,OR10J1,OR10J3,OR11H4,OR11H6,OR13C5,OR13C8,OR13C9,OR13D1,OR13F1,OR13H1,OR1D4,OR1Q1,OR1S2,OR2A9P,OR2A9P,OR2AT4,OR2C1,OR2K2,OR2S2,OR4B1,OR4D11,OR4E2,OR51D1,OR51E2,OR51F1,OR51F2,OR51I2,OR51L1,OR51M1,OR51Q1,OR51S1,OR51T1,OR51V1,OR52B2,OR52D1,OR52E2,OR52E4,OR52H1,OR52I2,OR52K1,OR52K2,OR52R1,OR52W1,OR56A1,OR56B4,OR5AK2,OR6K3,OR6S1,OR7C2,OR8B12,OR8B2,OR8B4,OR8B8,OR8D4,OR8S1,OR…
InterPro	Ion transport	1.37967e-08	4.41519e-06	1.38258	202.521	280	1591	70	86	105	CACNA1A,CACNA1B,CACNA1C,CACNA1D,CACNA1E,CACNA1G,CACNA1I,CATSPER3,CATSPER4,CNGA3,CNGB3,HCN4,ITPR1,KCNA1,KCNA10,KCNA2,KCNA4,KCNA5,KCNA6,KCNB1,KCNB2,KCNC1,KCNC2,KCNC3,KCNC4,KCND1,KCND2,KCND3,KCNF1,KCNG1,KCNG2,KCNG3,KCNH1,KCNH2,KCNH3,KCNH5,KCNH7,KCNH8,KCNMA1,KCNQ1,KCNQ3,KCNQ4,KCNQ5,KCNS1,KCNS2,KCNS3,KCNU1,KCNV1,NALCN,RYR1,RYR2,RYR3,SCN10A,SCN11A,SCN5A,SCN8A,TPCN1,TPCN2,TPTE,TPTE2,TRPC1,TRPC3,TRPC4,TR…	CACNA1A,CACNA1B,CACNA1C,CACNA1D,CACNA1E,CACNA1G,CACNA1I,CATSPER3,CATSPER4,CNGA2,CNGA3,CNGB3,HCN4,ITPR1,ITPR3,KCNA1,KCNA10,KCNA2,KCNA3,KCNA4,KCNA5,KCNA6,KCNB1,KCNB2,KCNC1,KCNC2,KCNC3,KCNC4,KCND1,KCND2,KCND3,KCNF1,KCNG1,KCNG2,KCNG3,KCNG4,KCNH1,KCNH2,KCNH3,KCNH4,KCNH5,KCNH6,KCNH7,KCNH8,KCNMA1,KCNQ1,KCNQ2,KCNQ3,KCNQ4,KCNQ5,KCNS1,KCNS2,KCNS3,KCNU1,KCNV1,NALCN,RYR1,RYR2,RYR3,SCN10A,SCN11A,SCN1A,SCN2A,S…
InterPro	Zinc finger, FYVE/PHD-type	1.47555e-08	4.58862e-06	1.44135	154.023	222	1210	71	100	135	ANKFY1,ASH1L,BAZ1B,BAZ2A,BAZ2B,BCL9,BPTF,BRD1,BRPF1,BRPF3,BSN,CHD5,DNMT3A,DNMT3B,DPF1,DPF3,EEA1,EXPH5,FGD2,FGD4,FGD5,ING1,ING2,INTS12,JHDM1D,KDM2B,KDM4A,KDM5B,KDM5C,MLL,MLL3,MLL5,MLLT10,MLPH,MTF2,MTMR3,MYRIP,MYST3,MYST4,NSD1,PCLO,PHF14,PHF15,PHF16,PHF17,PHF20L1,PHF21A,PHF21B,PHF3,PHF8,RIMS1,RIMS2,RNF34,RPH3A,RUFY1,RUFY3,SP100,SPIRE1,SYTL2,SYTL4,TAF3,TRIM24,TRIM28,TRIM33,WDFY3,WHSC1,WHSC1L1,ZFYVE2…	ANKFY1,ASH1L,BAZ1A,BAZ1B,BAZ2A,BAZ2B,BCL9,BPTF,BRD1,BRPF1,BRPF3,BSN,CHD3,CHD4,CHD5,DNMT3A,DNMT3B,DPF1,DPF2,DPF3,EEA1,EXPH5,FGD1,FGD2,FGD4,FGD5,FGD6,FYCO1,ING1,ING2,ING3,ING4,INTS12,JHDM1D,KDM2B,KDM4A,KDM5A,KDM5B,KDM5C,MLL,MLL2,MLL3,MLL5,MLLT10,MLLT6,MLPH,MTF2,MTMR3,MYRIP,MYST3,MYST4,NSD1,PCLO,PHF1,PHF12,PHF13,PHF14,PHF15,PHF16,PHF17,PHF19,PHF20,PHF20L1,PHF21A,PHF21B,PHF23,PHF3,PHF7,PHF8,PLEKHF2,P…
InterPro	Peptidase S1/S6, chymotrypsin/Hap, active site	8.83105e-08	2.05969e-05	1.85733	39.8422	74	313	36	50	100	ACR,C1S,CELA3B,CFB,ESSPL,F2,GZMB,HABP2,HGFAC,HPN,KLK1,KLK13,KLK14,KLK2,KLK4,KLK5,KLK7,KLK8,KLK9,MASP1,PLAT,PLG,PROC,PRSS12,PRSS7,ST14,TESSP2,TESSP5,TMPRSS11B,TMPRSS11D,TMPRSS11F,TMPRSS12,TMPRSS2,TMPRSS4,TMPRSS5,UNQ9391	ACR,C1S,CELA3B,CFB,CTRL,ESSPL,F2,F9,GZMB,HABP2,HGFAC,HPN,KLK1,KLK12,KLK13,KLK14,KLK15,KLK2,KLK4,KLK5,KLK7,KLK8,KLK9,MASP1,OVCH2,PLAT,PLAU,PLG,PROC,PRSS12,PRSS23,PRSS35,PRSS36,PRSS7,ST14,TESSP2,TESSP5,TMPRSS11A,TMPRSS11B,TMPRSS11D,TMPRSS11F,TMPRSS12,TMPRSS13,TMPRSS2,TMPRSS4,TMPRSS5,TMPRSS6,TMPRSS7,TRYX3,UNQ9391
InterPro	Tetratricopeptide repeat	1.27246e-07	2.80159e-05	1.49072	109.343	163	859	63	87	125	AIP,ANAPC7,APPBP2,ASPH,CABIN1,CDC27,CEP70,DNAJC3,FICD,FKBP4,FKBP5,FKBPL,IFT88,KDM6A,KLC2,LONRF1,LONRF2,LONRF3,NARG1,NARG1L,NPHP3,OGT,P4HA2,PEX5L,PPID,PPP5C,RANBP2,RGPD1,RGPD4,RPAP3,SGTB,SH3TC2,SPAG1,ST13,ST13,TANC2,TMTC2,TMTC4,TOMM34,TOMM70A,TTC1,TTC12,TTC13,TTC14,TTC18,TTC21A,TTC21B,TTC27,TTC28,TTC29,TTC3,TTC30A,TTC32,TTC35,TTC39A,TTC5,TTC6,TTC7A,TTC7B,TTC8,TTC9,TTC9B,ZC3H7B	AIP,ANAPC7,APPBP2,ASPH,BBS4,CABIN1,CCPG1,CDC23,CDC27,CEP70,CTR9,DNAJC3,DNAJC7,DYX1C1,FICD,FKBP4,FKBP5,FKBP8,FKBPL,GTF3C3,IFT88,KDM6A,KLC2,LONRF1,LONRF2,LONRF3,LRP2BP,NARG1,NARG1L,NPHP3,OGT,P4HA1,P4HA2,PEX5L,PPID,PPP5C,RANBP2,RAPSN,RGPD1,RGPD4,RPAP3,SGTB,SH3TC1,SH3TC2,SPAG1,SRP72,ST13,ST13,TANC1,TANC2,TMTC1,TMTC2,TMTC3,TMTC4,TOMM34,TOMM70A,TTC1,TTC12,TTC13,TTC14,TTC15,TTC16,TTC17,TTC18,TTC21A,TTC2…
InterPro	SLIT/NTRK-like, leucine-rich repeat-containing	1.32015e-07	2.84961e-05	1.67863	59.5724	100	468	6	6	6	SLITRK1,SLITRK2,SLITRK3,SLITRK4,SLITRK5,SLITRK6	SLITRK1,SLITRK2,SLITRK3,SLITRK4,SLITRK5,SLITRK6
InterPro	Ion transport 2	1.75359e-07	3.65618e-05	1.63477	66.0642	108	519	15	20	24	KCNH8,KCNK10,KCNK12,KCNK13,KCNK16,KCNK2,KCNK5,KCNK6,KCNK9,KCNMA1,KCNN1,KCNN2,KCNN3,KCNQ1,KCNT2	KCNH8,KCNK1,KCNK10,KCNK12,KCNK13,KCNK15,KCNK16,KCNK2,KCNK3,KCNK4,KCNK5,KCNK6,KCNK9,KCNMA1,KCNN1,KCNN2,KCNN3,KCNQ1,KCNT1,KCNT2
InterPro	Tetratricopeptide repeat-containing	2.76928e-07	5.60402e-05	1.46218	115.581	169	908	65	93	130	AIP,ANAPC7,APPBP2,ASPH,CABIN1,CDC27,CEP70,CRNKL1,DNAJC3,FICD,FKBP4,FKBP5,FKBPL,IFT88,KDM6A,KLC2,LONRF1,LONRF2,LONRF3,NARG1,NARG1L,NPHP3,OGT,P4HA2,PEX5L,PPID,PPP5C,RANBP2,RGPD1,RGPD4,RPAP3,SGTB,SPAG1,ST13,ST13,TANC2,TMTC2,TMTC4,TOMM34,TOMM70A,TTC1,TTC12,TTC13,TTC14,TTC18,TTC21A,TTC21B,TTC26,TTC27,TTC28,TTC29,TTC3,TTC30A,TTC32,TTC35,TTC5,TTC6,TTC7A,TTC7B,TTC8,TTC9,TTC9B,WDTC1,ZC3H7B,ZFC3H1	AIP,AIPL1,ANAPC7,APPBP2,ASPH,BBS4,C12orf30,CABIN1,CCPG1,CDC23,CDC27,CEP70,CRNKL1,CTR9,DNAJC3,DNAJC7,DYX1C1,ERCC6L,FICD,FKBP4,FKBP5,FKBP6,FKBP8,FKBPL,GTF3C3,IFT88,KDM6A,KLC2,LONRF1,LONRF2,LONRF3,LRP2BP,NARG1,NARG1L,NPHP3,OGT,P4HA1,P4HA2,PEX5L,PPID,PPP5C,PRPF6,RANBP2,RAPSN,RGPD1,RGPD4,RPAP3,SGTB,SPAG1,SRP72,ST13,ST13,TANC1,TANC2,TMTC1,TMTC2,TMTC3,TMTC4,TOMM34,TOMM70A,TRANK1,TTC1,TTC12,TTC13,TTC14,T…
InterPro	Tetratricopeptide-like helical	2.8877e-07	5.82225e-05	1.40333	148.931	209	1170	85	125	168	AIP,ANAPC7,APPBP2,ASPH,CABIN1,CDC27,CLTC,CLTCL1,CRNKL1,DNAJC3,FAM82A1,FAM82B,FICD,FKBP4,FKBP5,FKBPL,IFT88,KDM6A,KDM6B,KIAA0664,KIAA0892,KLC2,LONRF1,LONRF2,LONRF3,NAPA,NARG1,NARG1L,NPHP3,OGT,P4HA2,P4HA3,PEX5L,PPID,PPP5C,PRPF39,RANBP2,RGPD1,RGPD4,RPAP3,SEL1L,SEL1L2,SEL1L3,SGTB,SH3TC2,SPAG1,SPATA16,ST13,ST13,TANC2,TEX11,TMTC2,TMTC4,TOMM34,TOMM70A,TTC1,TTC12,TTC13,TTC14,TTC18,TTC21A,TTC21B,TTC23,TTC2…	AIP,AIPL1,ANAPC5,ANAPC7,APPBP2,ASPH,BBS4,C12orf30,C1orf163,C8orf76,CABIN1,CCPG1,CDC23,CDC27,CLTC,CLTCL1,CRNKL1,CTR9,DNAJC3,DNAJC7,DYX1C1,EEF2K,FAM82A1,FAM82B,FICD,FIS1,FKBP4,FKBP5,FKBP6,FKBP8,FKBPL,GTF3C3,IFT88,KDM6A,KDM6B,KIAA0141,KIAA0664,KIAA0892,KIAA1012,KLC2,LONRF1,LONRF2,LONRF3,LRP2BP,MTOR,NAPA,NAPG,NARG1,NARG1L,NPHP3,OGT,P4HA1,P4HA2,P4HA3,PEX5L,PPID,PPP5C,PRPF39,PRPF6,RANBP2,RAPSN,RGPD1,RG…
InterPro	Peptidase S1/S6, chymotrypsin/Hap	4.58489e-07	8.46865e-05	1.7122	49.6436	85	390	41	58	120	ACR,C1S,CELA3B,CFB,ESSPL,F2,GZMB,HABP2,HGF,HGFAC,HPN,HTRA1,KLK1,KLK13,KLK14,KLK2,KLK4,KLK5,KLK7,KLK8,KLK9,KLKBL4,MASP1,MST1,PAMR1,PLAT,PLG,PROC,PRSS12,PRSS7,ST14,TESSP2,TESSP5,TMPRSS11B,TMPRSS11D,TMPRSS11F,TMPRSS12,TMPRSS2,TMPRSS4,TMPRSS5,UNQ9391	ACR,C1S,CELA3B,CFB,CTRL,ESSPL,F2,F9,GZMB,HABP2,HGF,HGFAC,HPN,HTRA1,HTRA3,HTRA4,KLK1,KLK12,KLK13,KLK14,KLK15,KLK2,KLK4,KLK5,KLK7,KLK8,KLK9,KLKBL4,MASP1,MST1,OVCH2,PAMR1,PLAT,PLAU,PLG,PROC,PRSS12,PRSS23,PRSS35,PRSS36,PRSS7,ST14,TESSP2,TESSP5,TMPRSS11A,TMPRSS11B,TMPRSS11D,TMPRSS11F,TMPRSS12,TMPRSS13,TMPRSS2,TMPRSS4,TMPRSS5,TMPRSS6,TMPRSS7,TRYX3,TSP50,UNQ9391
InterPro	Dbl homology (DH) domain	4.94816e-07	9.04856e-05	1.53756	83.2486	128	654	47	59	74	ABL1,ALS2,ARHGEF10L,ARHGEF11,ARHGEF12,ARHGEF17,ARHGEF18,ARHGEF2,ARHGEF3,ARHGEF6,ARHGEF7,DNMBP,ECT2,ECT2L,FARP1,FARP2,FGD2,FGD4,FGD5,FLJ41603,ITSN1,ITSN2,KALRN,KIAA1112,LOC100271715,MCF2L,MCF2L2,NET1,NGEF,PLEKHG1,PLEKHG7,PREX1,PREX2,RASGRF1,RASGRF2,RGNEF,SGEF,SOS1,SOS2,SPATA13,TIAM1,TIAM2,TRIO,TTN,VAV1,VAV2,VAV3	ABL1,AKAP13,ALS2,ARHGEF10L,ARHGEF11,ARHGEF12,ARHGEF16,ARHGEF17,ARHGEF18,ARHGEF19,ARHGEF2,ARHGEF3,ARHGEF6,ARHGEF7,BCR,DNMBP,ECT2,ECT2L,FARP1,FARP2,FGD1,FGD2,FGD4,FGD5,FGD6,FLJ10357,FLJ20184,FLJ41603,ITSN1,ITSN2,KALRN,KIAA1112,LOC100271715,MCF2,MCF2L,MCF2L2,NET1,NGEF,NR2C1,PLEKHG1,PLEKHG3,PLEKHG5,PLEKHG7,PREX1,PREX2,RASGRF1,RASGRF2,RGNEF,SGEF,SOS1,SOS2,SPATA13,TIAM1,TIAM2,TRIO,TTN,VAV1,VAV2,VAV3
InterPro	Pre-SET domain	5.56687e-07	9.78969e-05	3.39236	5.60082	19	44	6	7	7	EHMT1,EHMT2,SETDB2,SETMAR,SUV39H1,SUV39H2	EHMT1,EHMT2,SETDB1,SETDB2,SETMAR,SUV39H1,SUV39H2
InterPro	P-type trefoil, conserved site	7.76264e-07	0.00013147	2.80571	8.9104	25	70	5	5	8	SI,TFF2,TFF3,ZP1,ZP4	SI,TFF2,TFF3,ZP1,ZP4
InterPro	Pleckstrin homology	7.76814e-07	0.00013116	1.21123	470.596	570	3697	167	223	274	ABL1,ACAP2,ADAP2,ADRBK1,ADRBK2,AFAP1,AFAP1L1,AGAP1,AGAP2,AGAP3,AKT2,AKT3,ALS2,APBB1IP,APPL2,ARAP1,ARAP2,ARAP3,ARHGAP10,ARHGAP15,ARHGAP20,ARHGAP21,ARHGAP24,ARHGAP25,ARHGAP26,ARHGAP27,ARHGEF11,ARHGEF12,ARHGEF18,ARHGEF2,ARHGEF3,ARHGEF6,ARHGEF7,ASAP1,ASAP2,ASAP3,BMX,CADPS,CADPS2,CDC42BPA,CDH2,CIT,CMIP,CNKSR2,CYTH1,CYTH3,CYTH4,DAB2IP,DAPP1,DGKD,DGKH,DNM2,DNM3,DOCK10,DOCK11,DOCK9,DOK2,DOK4,DOK5,DOK6,EC…	ABL1,ACAP2,ADAP2,ADRBK1,ADRBK2,AFAP1,AFAP1L1,AFAP1L2,AGAP1,AGAP2,AGAP3,AGAP6,AKAP13,AKT2,AKT3,ALS2,ANLN,APBB1IP,APPL2,ARAP1,ARAP2,ARAP3,ARHGAP10,ARHGAP12,ARHGAP15,ARHGAP20,ARHGAP21,ARHGAP22,ARHGAP23,ARHGAP24,ARHGAP25,ARHGAP26,ARHGAP27,ARHGEF11,ARHGEF12,ARHGEF16,ARHGEF18,ARHGEF19,ARHGEF2,ARHGEF3,ARHGEF6,ARHGEF7,ASAP1,ASAP2,ASAP3,BCR,BMX,BTK,CADPS,CADPS2,CDC42BPA,CDC42BPB,CDC42BPG,CDH2,CERK,CIT,CMI…
InterPro	Peptidase C19, ubiquitin carboxyl-terminal hydrolase 2	8.91262e-07	0.00014261	1.68626	50.4074	85	396	30	43	61	USP10,USP12,USP14,USP15,USP18,USP19,USP20,USP22,USP24,USP25,USP27X,USP29,USP3,USP31,USP35,USP36,USP4,USP40,USP42,USP43,USP46,USP47,USP48,USP49,USP53,USP54,USP7,USP8,USP9X,USPL1	CYLD,USP1,USP10,USP11,USP12,USP13,USP14,USP15,USP18,USP19,USP2,USP20,USP22,USP24,USP25,USP26,USP27X,USP28,USP29,USP3,USP30,USP31,USP32,USP35,USP36,USP38,USP4,USP40,USP42,USP43,USP44,USP45,USP46,USP47,USP48,USP49,USP5,USP53,USP54,USP7,USP8,USP9X,USPL1
InterPro	Serine/threonine phosphatase, PPP5	1.14077e-06	0.000176877	4.07348	3.43687	14	27	3	3	4	AK094504,PPEF1,PPP5C	AK094504,PPEF1,PPP5C
InterPro	Helicase, ATP-dependent, c2 type	1.73029e-06	0.000247377	4.48914	2.67312	12	21	3	3	5	BRIP1,DDX11,DDX12	BRIP1,DDX11,DDX12
InterPro	7TM GPCR, rhodopsin-like	3.21565e-06	0.000408774	1.2487	305.117	381	2397	151	271	675	ADORA2A,ADORA2A,ADORA3,ADRA1A,ADRA1B,ADRA1D,ADRA2A,ADRA2C,ADRB1,ADRB2,AGTR1,APLNR,AVPR1A,BDKRB1,CCKAR,CCR4,CCR5,CHRM1,CHRM2,CHRM3,CHRM5,CMKLR1,CPZ,CX3CR1,CXCR7,DRD1,DRD2,EDNRB,F2RL2,FFAR3,FSHR,GALR1,GNRHR,GPR101,GPR135,GPR139,GPR142,GPR148,GPR149,GPR15,GPR151,GPR161,GPR173,GPR21,GPR25,GPR26,GPR32,GPR35,GPR37,GPR39,GPR50,GPR52,GPR6,GPR63,GPR78,GPR82,GPR83,GPR85,GPR88,HCRTR2,HRH1,HRH2,HRH3,HRH4,HTR…	ADORA1,ADORA2A,ADORA2A,ADORA2B,ADORA3,ADRA1A,ADRA1B,ADRA1D,ADRA2A,ADRA2B,ADRA2C,ADRB1,ADRB2,AGTR1,APLNR,AVPR1A,AVPR2,BDKRB1,BRS3,C3AR1,CCKAR,CCKBR,CCR4,CCR5,CCR7,CCR8,CCR9,CCRL1,CHRM1,CHRM2,CHRM3,CHRM4,CHRM5,CMKLR1,CNR1,CPZ,CX3CR1,CXCR3,CXCR4,CXCR5,CXCR7,CYSLTR2,DRD1,DRD2,DRD3,DRD5,EDNRA,EDNRB,F2R,F2RL2,FFAR1,FFAR2,FFAR3,FSHR,GALR1,GALR3,GHSR,GNRHR,GPBAR1,GPR1,GPR101,GPR119,GPR12,GPR132,GPR135,GP…
InterPro	Post-SET domain	3.35702e-06	0.000423809	2.19237	16.4206	36	129	12	16	17	ASH1L,CRIPAK,EHMT2,MLL,MLL3,NSD1,SETD2,SETMAR,SUV39H1,SUV39H2,WHSC1,WHSC1L1	ASH1L,CRIPAK,EHMT2,MLL,MLL2,MLL3,NSD1,SETD1A,SETD1B,SETD2,SETDB1,SETMAR,SUV39H1,SUV39H2,WHSC1,WHSC1L1
InterPro	Transcription regulator SCAN	3.54448e-06	0.00044645	2.2741	14.5112	33	114	12	19	57	PEG3,SCAND1,ZKSCAN1,ZKSCAN2,ZNF18,ZNF232,ZNF274,ZNF397,ZNF446,ZSCAN1,ZSCAN20,ZSCAN22	PEG3,SCAND1,ZKSCAN1,ZKSCAN2,ZKSCAN5,ZNF18,ZNF232,ZNF24,ZNF274,ZNF396,ZNF397,ZNF446,ZNF483,ZSCAN1,ZSCAN18,ZSCAN2,ZSCAN20,ZSCAN21,ZSCAN22
InterPro	Innexin	4.25155e-06	0.000512075	7.85599	0.763748	6	6	3	3	3	PANX1,PANX2,PANX3	PANX1,PANX2,PANX3
InterPro	Calponin-homology	1.03898e-05	0.0010455	1.40253	109.089	153	857	40	64	75	ACTN2,ACTN4,ARHGEF6,ARHGEF7,CAMSAP1,CAMSAP1L1,CNN3,CXorf59,CYTSA,CYTSB,DIXDC1,DMD,DST,EHBP1,IQGAP2,IQGAP3,KIAA1543,LIMCH1,LRCH1,MACF1,MAPRE2,MAPRE3,MICAL2,MICAL3,MLL,NAV2,NAV3,PARVG,SPEF1,SPEF2,SPTB,SPTBN1,SPTBN2,SPTBN4,SYNE2,TAGLN3,UTRN,VAV1,VAV2,VAV3	ACTN1,ACTN2,ACTN4,ARHGEF6,ARHGEF7,CAMSAP1,CAMSAP1L1,CCDC45,CLMN,CNN1,CNN3,CXorf59,CYTSA,CYTSB,DIXDC1,DMD,DST,EHBP1,FLNA,FLNB,FLNC,GAS2,GAS2L3,IQGAP1,IQGAP2,IQGAP3,KIAA1543,LCP1,LIMCH1,LMO7,LRCH1,LRCH2,LRCH3,MACF1,MAPRE2,MAPRE3,MICAL2,MICAL3,MICALL1,MLL,NAV2,NAV3,PARVA,PARVB,PARVG,PLS1,PLS3,SMTN,SMTNL1,SPEF1,SPEF2,SPTB,SPTBN1,SPTBN2,SPTBN4,SYNE1,SYNE2,TAGLN,TAGLN2,TAGLN3,UTRN,VAV1,VAV2,VAV3
InterPro	Zinc finger, C3HC4 RING-type	1.14788e-05	0.00113434	1.34226	146.767	197	1153	73	111	170	AMFR,BMI1,CBLB,DTX2,IFT80,KIAA0182,LNX1,LNX2,LONRF1,LONRF2,LONRF3,MARCH1,MARCH10,MARCH11,MARCH3,MARCH4,MARCH5,MARCH7,MARCH8,MEX3C,MID1,MKRN1,MKRN3,PCGF5,PDZRN3,PEX10,RAD18,RING1,RNF111,RNF128,RNF13,RNF130,RNF133,RNF135,RNF150,RNF152,RNF160,RNF165,RNF168,RNF170,RNF182,RNF185,RNF213,RNF222,RNF24,RNF32,RNF38,RNF4,RNF43,RNF44,RNF5,RNF5,RNFT1,RNFT2,SFRS2IP,SH3RF1,SYVN1,TRIM10,TRIM2,TRIM3,TRIM32,TRIM35…	AMFR,BMI1,BRCA1,CBL,CBLB,DTX2,DTX3,IFT80,KIAA0182,LNX1,LNX2,LONRF1,LONRF2,LONRF3,MARCH1,MARCH10,MARCH11,MARCH3,MARCH4,MARCH5,MARCH6,MARCH7,MARCH8,MARCH9,MEX3C,MID1,MID2,MKRN1,MKRN3,PCGF1,PCGF2,PCGF5,PDZRN3,PEX10,PJA2,RAD18,RCHY1,RFWD2,RING1,RNF10,RNF103,RNF11,RNF111,RNF115,RNF122,RNF125,RNF128,RNF13,RNF130,RNF133,RNF135,RNF145,RNF148,RNF149,RNF150,RNF152,RNF160,RNF165,RNF168,RNF170,RNF181,RNF182,…
InterPro	Dpy-19	1.42016e-05	0.00135242	3.1424	5.09166	16	40	5	5	6	DPY19L1,DPY19L2,DPY19L2P2,DPY19L2P2,DPY19L3	DPY19L1,DPY19L2,DPY19L2P2,DPY19L2P2,DPY19L3
InterPro	Acyl-CoA dehydrogenase/oxidase, N-terminal	1.43467e-05	0.00135452	3.437	4.07332	14	32	7	8	14	ACAD9,ACADL,ACADS,ACADSB,ACOX2,ACOX3,NPHP3	ACAD9,ACADL,ACADM,ACADS,ACADSB,ACOX2,ACOX3,NPHP3
InterPro	HECT	2.45792e-05	0.00208141	1.59641	47.607	76	374	20	26	28	C12orf51,G2E3,HACE1,HECTD1,HECTD2,HECW1,HECW2,HERC2,HERC4,HERC6,HUWE1,ITCH,NEDD4,NEDD4L,SMURF1,TRIP12,UBE3A,UBE3C,UBR5,WWP1	C12orf51,G2E3,HACE1,HECTD1,HECTD2,HECW1,HECW2,HERC1,HERC2,HERC3,HERC4,HERC5,HERC6,HUWE1,ITCH,KIAA0317,NEDD4,NEDD4L,SMURF1,SMURF2,TRIP12,UBE3A,UBE3C,UBR5,WWP1,WWP2
InterPro	Zinc finger, PHD-finger	2.5856e-05	0.00217281	1.39318	103.361	144	812	45	66	82	ASH1L,BAZ1B,BAZ2A,BAZ2B,BCL9,BPTF,BRD1,BRPF1,BRPF3,CHD5,DPF1,DPF3,ING1,ING2,INTS12,JHDM1D,KDM2A,KDM2B,KDM5B,KDM5C,MLL,MLL3,MLL5,MLLT10,MTF2,MYST3,MYST4,NSD1,PHF14,PHF15,PHF16,PHF17,PHF20L1,PHF21A,PHF21B,PHF3,PHF8,SP100,TAF3,TRIM24,TRIM28,TRIM33,WHSC1,WHSC1L1,ZMYND8	ASH1L,BAZ1A,BAZ1B,BAZ2A,BAZ2B,BCL9,BPTF,BRD1,BRPF1,BRPF3,CHD3,CHD4,CHD5,DPF1,DPF2,DPF3,FBXL19,ING1,ING2,ING3,ING4,INTS12,JHDM1D,KDM2A,KDM2B,KDM5A,KDM5B,KDM5C,MLL,MLL2,MLL3,MLL5,MLLT10,MLLT6,MTF2,MYST3,MYST4,NSD1,PHF1,PHF12,PHF13,PHF14,PHF15,PHF16,PHF17,PHF19,PHF20,PHF20L1,PHF21A,PHF21B,PHF23,PHF3,PHF8,PYGO1,RSF1,SHPRH,SP100,TAF3,TRIM24,TRIM28,TRIM33,TRIM66,UHRF2,WHSC1,WHSC1L1,ZMYND8
InterPro	Multicopper oxidase, copper-binding site	2.65145e-05	0.00220459	6.73371	0.89104	6	7	4	4	6	CP,F5,F8,HEPHL1	CP,F5,F8,HEPHL1
InterPro	Cytochrome b5	2.81853e-05	0.00231552	2.1622	13.8748	30	109	9	10	14	CYB5A,CYB5B,CYB5R4,FA2H,FADS2,FADS3,HERC2,PGRMC1,PGRMC2	CYB5A,CYB5B,CYB5R4,FA2H,FADS2,FADS3,HERC2,NENF,PGRMC1,PGRMC2
InterPro	Ubiquitin-associated/translation elongation factor EF1B, N-terminal	3.46033e-05	0.00270935	1.55227	52.8259	82	415	24	36	43	CBLB,FAF2,HUWE1,LATS1,LATS2,MARK1,MARK2,MARK3,MARK4,RAD23B,SIK1,SIK2,SIK3,SNRK,SQSTM1,TDRD3,TNRC6C,UBAC1,UBAP1,UBASH3A,UBASH3B,UBE2K,USP24,VPS13D	CBL,CBLB,DHX57,FAF2,HUWE1,LATS1,LATS2,MARK1,MARK2,MARK3,MARK4,NBR1,NUB1,RAD23B,RSC1A1,SIK1,SIK2,SIK3,SNRK,SQSTM1,TDRD3,TNRC6C,TSFM,UBAC1,UBAP1,UBAP2L,UBASH3A,UBASH3B,UBE2K,UBL7,UBQLN1,UBQLN4,USP13,USP24,USP5,VPS13D
InterPro	Zinc finger, DHHC-type	3.49784e-05	0.00273094	2.05752	16.0387	33	126	11	17	25	MLL3,ZCCHC4,ZDHHC12,ZDHHC13,ZDHHC14,ZDHHC17,ZDHHC2,ZDHHC21,ZDHHC22,ZDHHC4,ZDHHC9	MLL3,ZCCHC4,ZDHHC1,ZDHHC12,ZDHHC13,ZDHHC14,ZDHHC17,ZDHHC2,ZDHHC20,ZDHHC21,ZDHHC22,ZDHHC23,ZDHHC3,ZDHHC4,ZDHHC5,ZDHHC8,ZDHHC9
InterPro	Src homology-3 domain	5.39726e-05	0.0038582	1.22488	274.313	336	2155	117	166	215	ABI2,ABL1,AMPH,ARHGAP10,ARHGAP26,ARHGAP27,ARHGEF6,ARHGEF7,ASAP1,ASAP2,BAIAP2,BAIAP2L1,BCAR1,BIN1,BLK,CACNB2,CACNB3,CACNB4,CASK,CD2AP,CSK,CTTN,DLG1,DLG2,DLG3,DNMBP,DOCK1,DOCK2,DOCK3,DOCK5,EPS8L1,FCHSD2,FLJ32810,FLJ41603,FNBP1,FRK,FUT8,FYN,GAS7,GRAP2,GRB2,ITK,ITSN1,ITSN2,KALRN,KIAA1112,LASP1,LYN,MAP3K10,MAP3K9,MAPK8IP1,MCF2L,MPP4,MPP5,MPP6,MPP7,MYO1E,NCF1,NCK2,NEBL,NEDD9,NGEF,NOSTRIN,NPHP1,OTOR,PAC…	ABI1,ABI2,ABL1,ABL2,AMPH,ARHGAP10,ARHGAP12,ARHGAP26,ARHGAP27,ARHGAP4,ARHGEF16,ARHGEF19,ARHGEF6,ARHGEF7,ASAP1,ASAP2,BAIAP2,BAIAP2L1,BCAR1,BCR,BIN1,BLK,BTK,BZRAP1,CACNB1,CACNB2,CACNB3,CACNB4,CASK,CASKIN1,CASKIN2,CD2AP,CRKL,CSK,CTTN,DLG1,DLG2,DLG3,DLG4,DLG5,DNMBP,DOCK1,DOCK2,DOCK3,DOCK4,DOCK5,EFS,EPS8,EPS8L1,EPS8L3,FCHSD2,FLJ32810,FLJ41603,FNBP1,FNBP1L,FRK,FUT8,FYB,FYN,GAS7,GRAP,GRAP2,GRB2,HCLS1,ITK…
InterPro	Regulator of G protein signalling	5.46296e-05	0.0039001	1.53704	52.6986	81	414	22	32	36	ADRBK1,ADRBK2,AKAP10,ARHGEF11,AXIN2,GRK7,RGS1,RGS10,RGS12,RGS13,RGS16,RGS17,RGS18,RGS2,RGS20,RGS21,RGS22,RGS6,RGS7,RGS9,SNX13,SNX14	ADRBK1,ADRBK2,AKAP10,ARHGEF11,AXIN2,GRK5,GRK6,GRK7,RGS1,RGS10,RGS12,RGS13,RGS14,RGS16,RGS17,RGS18,RGS19,RGS2,RGS20,RGS21,RGS22,RGS3,RGS4,RGS5,RGS6,RGS7,RGS8,RGS9,RGSL1,SNX13,SNX14,SNX25
InterPro	HEAT, type 2	5.57136e-05	0.00397234	2.06386	15.0204	31	118	12	13	19	ATR,CKAP5,CLASP1,CLASP2,KIAA1468,KPNB1,PIK3R4,PPP2R1B,PPP4R1L,PPP4R4,SCYL3,TEX10	ATR,CKAP5,CLASP1,CLASP2,KIAA1468,KPNB1,PIK3R4,PPP2R1B,PPP4R1,PPP4R1L,PPP4R4,SCYL3,TEX10
InterPro	Bromodomain	7.79586e-05	0.00518246	1.62357	38.1874	62	300	24	32	40	ASH1L,ATAD2B,BAZ1B,BAZ2A,BAZ2B,BPTF,BRD1,BRD2,BRD3,BRD4,BRPF1,BRPF3,BRWD1,CREBBP,EP300,MLL,PHIP,SMARCA2,SP100,TAF1L,TRIM24,TRIM28,TRIM33,ZMYND8	ASH1L,ATAD2,ATAD2B,BAZ1A,BAZ1B,BAZ2A,BAZ2B,BPTF,BRD1,BRD2,BRD3,BRD4,BRD7,BRPF1,BRPF3,BRWD1,CECR2,CREBBP,EP300,KAT2B,MLL,PBRM1,PHIP,SMARCA2,SMARCA4,SP100,TAF1L,TRIM24,TRIM28,TRIM33,TRIM66,ZMYND8
InterPro	Peptidase S16, lon N-terminal	8.2214e-05	0.00536174	2.5299	7.51019	19	59	4	5	6	CRBN,LONRF1,LONRF2,LONRF3	CRBN,LONP2,LONRF1,LONRF2,LONRF3
InterPro	Protein of unknown function DUF298	0.000102561	0.00636444	3.74095	2.67312	10	21	3	3	3	DCUN1D1,DCUN1D3,DCUN1D4	DCUN1D1,DCUN1D3,DCUN1D4
InterPro	SANT, eukarya	0.00013278	0.00778341	1.51923	50.0255	76	393	14	20	26	C14orf106,DNAJC1,MIER1,MTA3,MYSM1,NCOR1,NCOR2,RCOR1,RCOR2,RERE,SMARCA1,TADA2B,TRERF1,ZNF541	C14orf106,C14orf43,DNAJC1,MIER1,MIER3,MTA3,MYSM1,NCOR1,NCOR2,RCOR1,RCOR2,RCOR3,RERE,SMARCA1,SMARCA5,SMARCC2,TADA2A,TADA2B,TRERF1,ZNF541
InterPro	Zinc finger, BED-type predicted	0.000172946	0.00971372	3.32369	3.30958	11	26	4	4	6	ZBED2,ZBED3,ZBED4,ZBED5	ZBED2,ZBED3,ZBED4,ZBED5
InterPro	Protein-arginine deiminase, C-terminal	0.000179181	0.00988243	6.54666	0.763748	5	6	4	4	5	PADI2,PADI3,PADI4,PADI6	PADI2,PADI3,PADI4,PADI6
BioCyc Pathway	superpathway of cholesterol biosynthesis	5.59784e-08	1.38171e-05	2.76745	11.2016	31	88	12	14	25	DHCR24,DHCR7,HMGCR,HMGCS1,HMGCS2,HSD17B7,IDI1,LBR,PMVK,SC4MOL,SC5DL,SQLE	CYP51A1,DHCR24,DHCR7,HMGCR,HMGCS1,HMGCS2,HSD17B7,IDI1,LBR,MVK,PMVK,SC4MOL,SC5DL,SQLE
BioCyc Pathway	fatty acid &beta;-oxidation I	1.61739e-06	0.000234897	2.65267	9.80144	26	77	6	11	19	ACSBG2,ACSL6,EHHADH,HADHA,HSD17B10,PECI	ACAA2,ACADM,ACSBG2,ACSL1,ACSL4,ACSL6,EHHADH,HADH,HADHA,HSD17B10,PECI
BioCyc Pathway	1D-<i>myo</i>-inositol hexakisphosphate biosynthesis II (mammalian)	1.87013e-06	0.000261927	2.82325	8.14665	23	64	9	11	15	INPP5J,IPMK,IPPK,ITPK1,ITPKB,ITPKC,OCRL,SYNJ1,SYNJ2	INPP5J,INPPL1,IPMK,IPPK,ITPK1,ITPKA,ITPKB,ITPKC,OCRL,SYNJ1,SYNJ2
MSigDB Cancer Neighborhood	Neighborhood of RFC4	1.38835e-09	6.53152e-07	2.14554	30.2953	65	238	22	32	57	CCNB2,CTPS,DKC1,GINS1,H2AFZ,ITGB3BP,KIF11,KNTC1,MLH1,MSH6,PAICS,PCNA,RAD51AP1,RAN,RANBP1,RFC3,RPA3,RRM1,SMC2,SUPT16H,TTK,ZWINT	CCNA2,CCNB2,CCT2,CKS1B,CTPS,DKC1,GINS1,GINS2,GMNN,H2AFZ,ITGB3BP,KIF11,KNTC1,MLH1,MSH6,PAICS,PCNA,RAD51AP1,RAD54L,RAN,RANBP1,RFC3,RFC5,RPA3,RRM1,SMC2,SNRPD1,SNRPE,SUPT16H,TIMELESS,TTK,ZWINT
MSigDB Cancer Neighborhood	Neighborhood of MAP4K4	3.20426e-08	8.56176e-06	1.36379	211.176	288	1659	90	122	143	ABI2,ACTRT1,AGPAT4,ANKFY1,ANKRD17,ANKS1B,APPBP2,ARHGAP21,ARL8B,ARNT2,ATRN,BBS2,CALM1,CALM2,CASC4,CHST10,CLASP2,CLCN3,CLDND1,DCUN1D4,DDHD2,DDX17,DLG1,DTNA,DYNC1I2,DYNC1LI2,EPB41L2,FAM19A5,FBXO21,FBXW11,FMNL2,GAB2,GORASP1,GPM6B,GPR107,GPRC5B,GZF1,HERC2,HIPK2,HMBOX1,IL17D,IL6ST,KIAA0430,KIAA1109,KIF1B,LRP4,MACF1,MAP4K4,MTMR2,MTUS1,MYO10,MYO9A,NGRN,NPTN,OAZ2,PDZD2,POGZ,PPIG,PREPL,PREX1,PSAT1,PTK2,PTP…	ABHD6,ABI2,ACTRT1,AGPAT4,AHCYL1,ANKFY1,ANKRD17,ANKS1B,APPBP2,ARHGAP21,ARL8B,ARNT2,ATRN,BBS2,BMPR2,BTRC,CALM1,CALM2,CALM3,CASC4,CEP350,CHST10,CLASP2,CLCN3,CLDND1,CRKL,DCUN1D4,DDHD2,DDX17,DLG1,DNAJB14,DTNA,DYNC1H1,DYNC1I2,DYNC1LI2,EPB41L2,ERBB2IP,FAM19A5,FBXO21,FBXW11,FMNL2,GAB2,GBA2,GOLGA7,GORASP1,GPM6B,GPR107,GPRC5B,GZF1,HERC2,HIPK1,HIPK2,HMBOX1,IL17D,IL6ST,KIAA0430,KIAA1109,KIDINS220,KIF1B,LANCL…
MSigDB Cancer Neighborhood	Neighborhood of H2AFX	6.11077e-08	1.50158e-05	2.32971	18.4572	43	145	9	13	28	CCNB2,CENPE,HMGB2,PCNA,PTTG1,RRM1,UBE2S,WHSC1,ZWINT	CCNA2,CCNB2,CDCA8,CENPE,HMGB2,PCNA,PTTG1,RRM1,RRM2,TMPO,UBE2S,WHSC1,ZWINT
MSigDB Cancer Neighborhood	Neighborhood of NF2	9.51096e-08	2.19963e-05	1.43352	140.912	202	1107	90	145	232	AP2A1,APPBP2,ASH1L,ATP2B2,BAT5,BAZ2A,BCL2L1,C20orf3,C20orf4,C21orf59,C9orf5,CAND1,CHD9,DCUN1D3,DDX17,DENND4A,DENR,DHCR7,DHX40,DYNC1I2,EHBP1,EIF4EBP2,EPS15L1,FBXO9,FOXJ3,GORASP1,GTF2A1,HECTD1,IMPAD1,ING1,KIAA1191,KIAA2013,KLF12,KLHL18,LEMD3,LRIG2,MAPK8IP1,METT11D1,MKS1,MLL,MLLT4,MRPS5,MTMR7,MTPN,MTRF1L,MYO9A,NPFF,NPHP3,NUCKS1,NUP133,OGFOD1,POGZ,POLDIP3,PPIG,PREP,RALGPS1,RAN,RANBP6,RAPGEF1,RPS6KC1,…	AAAS,ACTR10,ALKBH5,ANAPC5,AP2A1,APPBP2,ASCC1,ASH1L,ATP2B2,ATXN7L3,BAHD1,BAT5,BAZ2A,BCL2L1,C14orf1,C1orf77,C20orf3,C20orf4,C21orf59,C9orf5,CAND1,CHD9,COX4NB,DCUN1D3,DDX17,DDX47,DENND4A,DENR,DHCR7,DHX40,DYNC1I2,EDNRA,EHBP1,EIF4EBP2,EPS15L1,ERAL1,EVI5L,FBXO9,FNTB,FOXJ3,GOLGA7,GORASP1,GPBP1,GTF2A1,HAAO,HECTD1,IMPAD1,ING1,KIAA0495,KIAA1191,KIAA2013,KLF12,KLHL18,LEMD3,LIG3,LRIG2,LUC7L2,MAP6,MAPK8IP1,ME…
MSigDB Cancer Neighborhood	Neighborhood of RAN	2.55108e-07	5.2007e-05	1.36041	185.973	253	1461	82	119	160	ABI2,ANKRD17,APPBP2,ATP2B2,ATP6V1A,BCL2L1,BRPF3,C9orf5,CALM1,CALM2,CAND1,CHD9,CLASP2,CLCN3,CRNKL1,DDX17,DYNC1I2,EPC2,FAM19A5,FBXO21,FBXO30,FBXW11,GABBR2,GORASP1,GPR107,GZF1,HECTD1,HERC2,IPO9,KIAA0430,KIAA1109,KIAA1468,KIF1B,KIF5C,LARGE,LEMD3,MAP1B,MAP4K4,MAPK8IP1,MECP2,MOAP1,MTMR3,NAB1,NCAM1,NDRG3,NGRN,NUP133,OGFOD1,PHC1,PHYHIPL,POGK,POGZ,PPIG,PREPL,PTK2,RALGPS1,RAN,RAP2A,RERE,RTN4,SESN3,SPAG9,SP…	AAAS,ABHD6,ABI2,ANKRD17,APPBP2,ASCC1,ATP2B2,ATP6V1A,ATP6V1B2,ATXN7L3,BCL2L1,BMPR2,BRPF3,BTRC,C1orf77,C9orf5,CALM1,CALM2,CALM3,CAND1,CHD9,CLASP2,CLCN3,CRNKL1,DCTN4,DDX17,DNAJB14,DYNC1I2,EPC2,FAM19A5,FAM8A1,FBXO21,FBXO30,FBXW11,GABBR2,GBA2,GOLGA7,GORASP1,GPR107,GSK3B,GZF1,HECTD1,HERC2,HIPK1,IPO9,KIAA0430,KIAA1109,KIAA1468,KIDINS220,KIF1B,KIF3B,KIF5C,KPNA3,LANCL1,LARGE,LEMD3,MAP1B,MAP4K4,MAP6,MAPK8I…
MSigDB Cancer Neighborhood	Neighborhood of ING1	5.19934e-07	9.38319e-05	2.53683	12.22	31	96	18	31	50	AP2A1,BAT5,C21orf59,C2orf29,DCUN1D3,DENND4A,EIF4EBP2,ING1,KLHL18,METT11D1,MRPS5,SMG5,SUMF2,SUV39H1,TEX261,TMEM138,TRAFD1,TUT1	ANAPC5,AP2A1,BAHD1,BAT5,C21orf59,C2orf29,DCUN1D3,DDX47,DENND4A,EIF4EBP2,ING1,KLHL18,METT11D1,MMAB,MRPS5,NF2,PRDM4,PSME3,S100PBP,SCAMP2,SIN3A,SMG5,SUMF2,SUV39H1,TAOK2,TBC1D10B,TEX261,TMEM138,TRAFD1,TUT1,WIBG
MSigDB Cancer Neighborhood	Neighborhood of EI24	8.38426e-07	0.000138587	1.46581	104.379	153	820	57	89	141	AARS,AFG3L2,AHSA1,AKR7A2,AP2S1,ATP5J,ATXN10,BAZ1B,BUB1,BUB3,CALM1,CALM2,COQ9,CYCS,DDX19B,DGUOK,DKC1,DNAJC11,DOCK3,EI24,EIF2S2,EPRS,ESD,F8A3,GNB1,GOT2,H2AFZ,HCCS,HDAC2,HDDC2,LARP1,LYPLA1,MCFD2,MDH1,MFAP1,NCBP2,NCOR2,NDUFS2,NUDC,POLR2I,PPM1G,PRDX4,PRPS2,PSMB2,RHEB,RTN4,SCARB1,SFRS1,TARS,TM9SF2,TM9SF4,TOMM70A,UBE2S,VBP1,VDAC1,VPS26A,ZWINT	AARS,ACTL6A,AFG3L2,AHSA1,AKR7A2,ALG8,AP2S1,ATP5G3,ATP5J,ATXN10,BAZ1B,BUB1,BUB3,CALM1,CALM2,CALM3,COQ9,CYCS,DDX19B,DGUOK,DKC1,DNAJC11,DOCK3,DONSON,DYNLL1,EI24,EIF2S2,EIF4G1,EPRS,ESD,F8A3,FH,G3BP2,GARS,GNB1,GOT2,H2AFZ,HAT1,HCCS,HDAC2,HDDC2,IFRD1,KHSRP,LARP1,LSM4,LYPLA1,MCFD2,MDH1,METAP1,MFAP1,NCBP2,NCOR2,NDUFS2,NDUFV1,NUDC,PDHB,POLR2I,PPM1G,PRDX3,PRDX4,PRPS2,PSMB2,RAC1,RHEB,RTN4,SCARB1,SDHB,SFRS1,S…
MSigDB Cancer Neighborhood	Neighborhood of BUB3	1.14695e-06	0.000177336	1.37778	150.968	208	1186	92	152	263	AATF,ACLY,AFG3L2,AHSA1,AK2,AKR7A2,ANP32A,ANP32B,ATP5J,ATXN10,BAZ1B,BUB1,BUB3,CALM1,CALM2,CLPP,COPS5,CSK,CYCS,DCTD,DDX19B,DEK,DGUOK,DKC1,DNAJC11,DNMT1,DOCK3,DUT,EI24,EIF2S2,EIF4EBP2,EPRS,ESD,FUS,GMPS,GNB1,GOT2,H2AFZ,HADHA,HCCS,HDAC2,HDDC2,ILF3,IMPDH1,LYPLA1,MDH1,MRPS27,MTDH,NCBP2,NDUFS2,NDUFS5,NRD1,NUDC,PAICS,PARK7,PCNA,PDIA6,POLA2,POLR2I,PPM1G,PPP1CC,PRPS2,PSMB2,PSMB7,PTPN11,RAN,RBBP4,RHEB,RRM1,R…	AATF,ACLY,ACTL6A,AFG3L2,AHSA1,AK2,AKR7A2,ANAPC5,ANP32A,ANP32B,AP3S1,ATP5G1,ATP5G3,ATP5J,ATXN10,BAZ1B,BUB1,BUB3,CALM1,CALM2,CALM3,CCT2,CLPP,COPS5,CSK,CYCS,DARS,DCTD,DDX19B,DEK,DGUOK,DKC1,DNAJC11,DNMT1,DOCK3,DONSON,DRG1,DUT,DYNLL1,EI24,EIF1AX,EIF2S2,EIF4EBP2,EPRS,ERP29,ESD,FH,FUS,G3BP2,GARS,GMPS,GNB1,GOT2,H2AFZ,HADH,HADHA,HAT1,HCCS,HCFC1,HDAC1,HDAC2,HDDC2,IFRD1,ILF3,IMPDH1,IMPDH2,KHDRBS1,KHSRP,LRPP…
MSigDB Cancer Neighborhood	Neighborhood of PDPK1	6.10416e-06	0.000674681	1.68343	42.7699	72	336	28	45	69	ACR,ADRBK1,ANKRD12,ARVCF,BCL3,CNOT4,CNTN1,DRG2,EFNA3,GHITM,GP2,GPR161,GPR35,GSK3A,HTR2A,IGHMBP2,IGSF9B,LGALS9,LMTK2,M6PR,MYST2,NR1H2,ODF1,PDPK1,PHIP,PIM1,RAP1GAP,XRCC2	ACR,ADRBK1,ANKRD12,ARAF,ARVCF,BCL3,CNOT4,CNTN1,CPNE6,DRG2,E2F1,EFNA3,GHITM,GNL1,GP2,GPR161,GPR35,GRM4,GSK3A,GTF2F1,HTR2A,IGHMBP2,IGSF9B,KIF1C,KIF21B,LGALS9,LMTK2,M6PR,MVK,MYST2,NR1H2,NUDT3,ODF1,PDPK1,PHIP,PIM1,PLEKHG3,PNMT,PRPH,RAP1GAP,SLC9A3R2,TUB,USP11,VAMP1,XRCC2
MSigDB Cancer Neighborhood	Neighborhood of USP6	1.60509e-05	0.00146516	1.77082	31.0591	55	244	20	32	53	ADD2,AP2A1,ATP2B2,DDX11,DENND4A,DIP2B,EPS15L1,GLYCTK,KLHL18,LRIG2,MKS1,MMP16,MTMR7,MYO9A,NPHP3,SEMA4F,SMG5,TEX261,TMEM138,TUT1	ADD2,AP2A1,ATP2B2,BAHD1,DDX11,DENND4A,DIP2B,EDNRA,EPS15L1,ERAL1,EVI5L,GLYCTK,KLHL18,LRIG2,MKS1,MMP16,MRVI1,MTMR7,MYO9A,NPHP3,PRDM4,SCAMP2,SEC24A,SEMA4F,SH2B1,SIN3A,SMG5,TBC1D10B,TBC1D22B,TEX261,TMEM138,TUT1
MSigDB Cancer Neighborhood	Neighborhood of GNB1	1.75171e-05	0.00157806	1.27945	206.339	264	1621	108	174	282	ACTR3,ADD1,AFG3L2,AK2,AKR7A2,ANP32A,ASXL1,ATXN10,BAZ1B,BAZ2A,BMI1,BUB3,CALM1,CALM2,CAMKK2,CLPP,CLSTN1,CSK,DCTD,DDX19B,DEK,DGUOK,DIAPH1,DKC1,DNMT1,DOCK3,DUT,EI24,EIF4EBP2,ELOVL5,EPRS,ESD,FBXW11,FUS,GNB1,GOT2,GUSB,H2AFZ,HADHA,HCCS,HDAC2,ILF3,IMPDH1,LYPLA1,MCFD2,MDH1,MPHOSPH9,MTDH,NCOR2,NDUFS2,NDUFS5,NRD1,NUDC,OXA1L,PARK7,PCMT1,PDIA6,PIN1,PKN1,POLA2,POLR2A,POLR2C,PPM1G,PPP1CC,PRPS2,PSMA1,PSMB2,PSMB7…	ACTR2,ACTR3,ADD1,AFG3L2,AHCYL1,AK2,AKR7A2,ANAPC5,ANP32A,AP3S1,ARPC2,ASXL1,ATP5G3,ATXN10,ATXN2L,BAZ1B,BAZ2A,BMI1,BUB3,CALM1,CALM2,CALM3,CAMKK2,CAP1,CBFB,CCNI,CHD4,CLPP,CLSTN1,CSK,DCTD,DDX19B,DEK,DGKZ,DGUOK,DIAPH1,DKC1,DNMT1,DOCK3,DONSON,DR1,DUT,DYNLL1,EI24,EIF1AX,EIF4EBP2,ELOVL5,EPRS,ERP29,ESD,FBXW11,FH,FUS,G3BP2,GARS,GNB1,GNB2,GOT2,GUSB,H2AFZ,HADH,HADHA,HAUS7,HCCS,HCFC1,HDAC1,HDAC2,IFRD1,ILF3,IMP…
MSigDB Cancer Neighborhood	Neighborhood of DDX11	1.95426e-05	0.0017156	2.23357	12.9837	29	102	15	21	38	ADD2,AP2A1,COL11A2,COMMD2,DDX11,DENND4A,GLYCTK,MEF2D,MKS1,NPHP3,SEMA4F,SMG5,TEX261,TUT1,WDR5	ADD2,AP2A1,COL11A2,COMMD2,DDX11,DENND4A,GLYCTK,KRT2,MEF2D,MKS1,NPHP3,S100PBP,SCAMP2,SEC24A,SEMA4F,SIN3A,SMG5,STAT5B,TEX261,TUT1,WDR5
MSigDB Cancer Neighborhood	Neighborhood of SNRP70	3.15786e-05	0.00254492	1.85841	23.6762	44	186	17	26	54	ADD1,API5,CSK,DDX17,DGKD,DIAPH1,EIF4G2,LSM14A,PHIP,PSMA1,PTP4A2,RNF44,RPL22,SFRS14,SRF,TACC1,XRCC5	ADD1,ANAPC5,API5,ARPC2,CSK,DDX17,DGKD,DIAPH1,EIF4G2,LSM14A,NACA,NCL,NXF1,PHIP,PSMA1,PTP4A2,RBM5,RNF44,RNPS1,RPL22,SFRS14,SRF,SRP14,TACC1,WDR1,XRCC5
MSigDB Cancer Neighborhood	Neighborhood of MSH2	3.40638e-05	0.00267471	2.14254	14.0021	30	110	11	15	26	DKC1,GINS1,ITGB3BP,MLH1,MSH6,PCNA,RAD51AP1,RRM1,SERBP1,SUPT16H,TCERG1	DKC1,GINS1,ITGB3BP,LRPPRC,MLH1,MSH6,PCNA,RAD51AP1,RRM1,SERBP1,SNRPD1,SR140,SUPT16H,TCERG1,USP1
MSigDB Cancer Neighborhood	Neighborhood of RFC3	4.14208e-05	0.00315343	1.8836	21.7668	41	171	17	23	38	ADSL,CENPE,CTPS,H2AFZ,ITGB3BP,KIF11,MSH6,PAICS,PFAS,RAD51AP1,RAN,RANBP1,RFC3,RPA3,RRM1,SMC2,SUPT16H	ADSL,CCNA2,CENPE,CKS1B,CTPS,GINS2,H2AFZ,ITGB3BP,KIF11,MRPL35,MSH6,PAICS,PFAS,RAD51AP1,RAN,RANBP1,RFC3,RPA3,RRM1,SMC2,SNRPD1,SUPT16H,TIMELESS
MSigDB Cancer Neighborhood	Neighborhood of PPP6C	4.52416e-05	0.00338347	1.89301	21.1304	40	166	12	18	33	ACTR3,ARF6,C14orf166,CCDC59,GDI2,KCMF1,PAPOLA,POP4,PPP6C,PSMA1,WAPAL,YY1	ACTR3,ARF6,ATP5L,C14orf166,CCDC59,CDV3,GDI2,KCMF1,PAPOLA,POP4,PPP6C,PSMA1,SFRS3,SMNDC1,SNW1,UBE2D3,WAPAL,YY1
MSigDB Cancer Neighborhood	Neighborhood of PTPN9	5.08236e-05	0.00365684	1.73098	30.0408	52	236	24	37	53	ACR,ADAM15,ANKRD12,B4GALT3,CNOT4,CNP,CNTN1,DDX11,DRG2,GHITM,GPR35,GSK3A,IGHMBP2,IGSF9B,KIAA0195,M6PR,MGAT1,NDST1,ODF1,ORC1L,PFDN1,PTPN9,TCOF1,USP19	ACR,ADAM15,ADAMTSL2,ANKRD12,B4GALT3,CNOT4,CNP,CNTN1,DDX11,DRG2,FDXR,GHITM,GPR35,GSK3A,IGHMBP2,IGSF9B,KIAA0195,M6PR,MGAT1,MVK,MYL2,NDST1,NUDT3,ODF1,ORC1L,PAX8,PFDN1,PITPNM1,PRPH,PSD4,PTPN9,RBM8A,SLC6A9,SLC9A3R2,TCOF1,TUB,USP19
MSigDB Cancer Neighborhood	Neighborhood of TNFRSF1B	6.38393e-05	0.00446494	1.79452	25.0764	45	197	15	27	57	AOAH,CLEC4A,CTSS,DOK2,DUSP1,FCN1,FGL2,GMIP,IGSF6,PILRA,RGS2,RIN3,RNF130,TBXAS1,TLR2	AOAH,AP1S2,ARPC1B,ARRB2,CECR1,CLEC4A,COTL1,CPVL,CTSS,DOK2,DUSP1,FCER1G,FCN1,FGL2,GMIP,IGSF6,PILRA,PSAP,RGS2,RHOG,RIN3,RNF130,SH3BGRL3,STXBP2,TBXAS1,TLR2,TNFRSF1B
MSigDB Cancer Neighborhood	Neighborhood of CEBPA	0.000125479	0.0074266	2.03414	14.2566	29	112	17	29	63	ADI1,AGXT,AMBP,APCS,F2,HGFAC,HPD,HPN,HRG,HSD17B6,LCAT,MAT1A,NNMT,PROC,SAA4,SERPIND1,TST	ADI1,AGXT,AMBP,APCS,APOC1,ASGR1,CEBPA,CES1,CYP2A6,F2,GALK1,HGFAC,HPD,HPN,HRG,HSD17B6,LCAT,MAT1A,NNMT,ORM1,PROC,RBP4,SAA4,SERPIND1,SERPINF2,SERPING1,SLC38A3,TST,UPB1
PANTHER Pathway	Heterotrimeric G-protein signaling pathway-Gi alpha and Gs alpha mediated pathway	9.04217e-19	7.11012e-15	1.59618	216.141	345	1698	92	128	155	ADCY2,ADCY5,ADCY6,ADCY7,ADCY8,ADCY9,ADORA2A,ADORA2A,ADORA3,ADRA1A,ADRA1B,ADRA1D,ADRA2A,ADRA2C,ADRB1,ADRB2,ADRBK1,ADRBK2,CALM1,CALM2,CHRM1,CHRM2,CHRM3,CHRM5,CLTC,CLTCL1,CREB1,CREBBP,CREM,DRD1,DRD2,EP300,GNAI1,GNAI2,GNAI3,GNAL,GNB1,GNG12,GNG2,GNG4,GNG8,GNRHR,GPR50,GRK7,GRM1,GRM2,GRM3,GRM5,GRM6,GRM7,GRM8,GSK3A,HRH1,HRH2,HRH3,HRH4,HTR1B,HTR1F,HTR2A,HTR2B,HTR2C,HTR4,HTR5A,HTR7,KCNJ3,KCNJ6,MTNR1B,OPRD1…	ADCY2,ADCY3,ADCY5,ADCY6,ADCY7,ADCY8,ADCY9,ADORA1,ADORA2A,ADORA2A,ADORA2B,ADORA3,ADRA1A,ADRA1B,ADRA1D,ADRA2A,ADRA2B,ADRA2C,ADRB1,ADRB2,ADRBK1,ADRBK2,ARRB1,ARRB2,CALM1,CALM2,CALM3,CHRM1,CHRM2,CHRM3,CHRM4,CHRM5,CLTA,CLTC,CLTCL1,CREB1,CREB3,CREBBP,CREM,DRD1,DRD2,DRD3,DRD5,EP300,GNAI1,GNAI2,GNAI3,GNAL,GNB1,GNB2,GNG12,GNG2,GNG4,GNG8,GNRHR,GPR50,GRK5,GRK6,GRK7,GRM1,GRM2,GRM3,GRM4,GRM5,GRM6,GRM7,GRM8,GSK…
PANTHER Pathway	Histamine H2 receptor mediated signaling pathway	1.30625e-18	7.98889e-15	2.93608	25.2037	74	198	15	18	24	ADCY2,ADCY7,GNAL,GNB1,GNB3,GNB4,GNG12,GNG2,GNG4,GNG8,HRH2,PRKACA,PRKACG,PRKAR2A,PRKX	ADCY2,ADCY7,GNAL,GNB1,GNB2,GNB3,GNB4,GNG12,GNG2,GNG4,GNG8,HRH2,PRKACA,PRKACB,PRKACG,PRKAR2A,PRKAR2B,PRKX
PANTHER Pathway	Beta2 adrenergic receptor signaling pathway	1.2372e-10	8.62012e-08	1.83969	60.3361	111	474	27	33	43	ADCY2,ADCY7,ADRB2,CACNA1C,CACNA1D,CACNB2,CACNB3,CACNB4,GNAL,GNB1,GNB3,GNB4,GNG12,GNG2,GNG4,GNG8,PRKACA,PRKACG,PRKAR2A,PRKX,RYR1,RYR2,RYR3,SNAP23,SNAP25,SNAP29,VAMP3	ADCY2,ADCY7,ADRB2,CACNA1C,CACNA1D,CACNB1,CACNB2,CACNB3,CACNB4,GNAL,GNB1,GNB2,GNB3,GNB4,GNG12,GNG2,GNG4,GNG8,PRKACA,PRKACB,PRKACG,PRKAR2A,PRKAR2B,PRKX,RYR1,RYR2,RYR3,SNAP23,SNAP25,SNAP29,VAMP1,VAMP3,VAMP8
PANTHER Pathway	5HT1 type receptor mediated signaling pathway	2.7589e-10	1.68731e-07	1.86786	54.608	102	429	24	32	43	ADCY2,ADCY7,GNAI1,GNAI2,GNAI3,GNB1,GNB3,GNB4,GNG12,GNG2,GNG4,GNG8,HTR1B,HTR1F,KCNK9,PRKACA,PRKACG,PRKAR2A,PRKX,SLC6A4,SNAP23,SNAP25,SNAP29,VAMP3	ADCY2,ADCY7,GNAI1,GNAI2,GNAI3,GNB1,GNB2,GNB3,GNB4,GNG12,GNG2,GNG4,GNG8,HTR1A,HTR1B,HTR1D,HTR1F,KCNK3,KCNK9,PRKACA,PRKACB,PRKACG,PRKAR2A,PRKAR2B,PRKX,SLC18A2,SLC6A4,SNAP23,SNAP25,SNAP29,VAMP1,VAMP3
PANTHER Pathway	Heterotrimeric G-protein signaling pathway-Gq alpha and Go alpha mediated pathway	3.08893e-10	1.84809e-07	1.46576	172.607	253	1356	62	87	112	ADORA2A,ADORA2A,ADORA3,BDKRB1,CACNA1A,CACNA1B,CACNA1E,CHRM1,CHRM2,CHRM3,CHRM5,CLTC,CLTCL1,DNAJC27,DRD1,DRD2,GARNL3,GNAO1,GNB1,GNB3,GNB4,GNG12,GNG2,GNG4,GNG8,GNRHR,GRM1,GRM2,GRM3,GRM5,GRM6,GRM7,GRM8,ITPR1,KCNJ3,KCNJ6,OPRD1,OPRK1,OPRL1,OPRM1,PLCB4,PRKCA,PRKCB,PRKCE,PRKCH,PRKCQ,RAP1B,RAP1GAP,RASGRP1,RASGRP2,RASGRP3,RGS1,RGS10,RGS12,RGS13,RGS16,RGS17,RGS18,RGS2,RGS6,RGS7,RGS9	ADORA1,ADORA2A,ADORA2A,ADORA2B,ADORA3,BDKRB1,CACNA1A,CACNA1B,CACNA1E,CHRM1,CHRM2,CHRM3,CHRM4,CHRM5,CLTA,CLTC,CLTCL1,DNAJC27,DRD1,DRD2,DRD3,DRD5,GARNL3,GNAO1,GNAQ,GNB1,GNB2,GNB3,GNB4,GNG12,GNG2,GNG4,GNG8,GNRHR,GPR45,GRM1,GRM2,GRM3,GRM4,GRM5,GRM6,GRM7,GRM8,ITPR1,ITPR3,KCNJ3,KCNJ6,KCNJ9,OPRD1,OPRK1,OPRL1,OPRM1,PLCB1,PLCB2,PLCB3,PLCB4,PRKCA,PRKCB,PRKCE,PRKCH,PRKCI,PRKCQ,RAP1A,RAP1B,RAP1GAP,RASGRP1,RA…
PANTHER Pathway	Beta1 adrenergic receptor signaling pathway	4.98677e-10	2.7726e-07	1.80409	60.9726	110	479	27	33	43	ADCY2,ADCY7,ADRB1,CACNA1C,CACNA1D,CACNB2,CACNB3,CACNB4,GNAL,GNB1,GNB3,GNB4,GNG12,GNG2,GNG4,GNG8,PRKACA,PRKACG,PRKAR2A,PRKX,RYR1,RYR2,RYR3,SNAP23,SNAP25,SNAP29,VAMP3	ADCY2,ADCY7,ADRB1,CACNA1C,CACNA1D,CACNB1,CACNB2,CACNB3,CACNB4,GNAL,GNB1,GNB2,GNB3,GNB4,GNG12,GNG2,GNG4,GNG8,PRKACA,PRKACB,PRKACG,PRKAR2A,PRKAR2B,PRKX,RYR1,RYR2,RYR3,SNAP23,SNAP25,SNAP29,VAMP1,VAMP3,VAMP8
PANTHER Pathway	GABA-B receptor II signaling	5.39791e-09	2.09237e-06	1.80149	53.8443	97	423	25	29	38	ADCY2,ADCY5,ADCY6,ADCY7,ADCY8,ADCY9,CACNA1A,CACNA1B,CACNA1G,GABBR2,GNAI1,GNAI3,GNAO1,GNB1,GNB3,GNB4,GNG12,GNG2,GNG4,GNG8,KCNJ3,PRKACA,PRKACG,PRKAR1A,PRKAR2A	ADCY2,ADCY5,ADCY6,ADCY7,ADCY8,ADCY9,CACNA1A,CACNA1B,CACNA1G,GABBR1,GABBR2,GNAI1,GNAI3,GNAO1,GNB1,GNB2,GNB3,GNB4,GNG12,GNG2,GNG4,GNG8,KCNJ3,PRKACA,PRKACB,PRKACG,PRKAR1A,PRKAR2A,PRKAR2B
PANTHER Pathway	5HT4 type receptor mediated signaling pathway	1.41487e-08	4.50167e-06	1.89214	41.7516	79	328	17	22	30	ADCY2,ADCY7,GNAL,GNB1,GNB3,GNB4,GNG12,GNG2,GNG4,GNG8,HTR4,KCNK9,SLC6A4,SNAP23,SNAP25,SNAP29,VAMP3	ADCY2,ADCY7,GNAL,GNB1,GNB2,GNB3,GNB4,GNG12,GNG2,GNG4,GNG8,HTR4,KCNK3,KCNK9,SLC18A2,SLC6A4,SNAP23,SNAP25,SNAP29,VAMP1,VAMP3,VAMP8
PANTHER Pathway	Metabotropic glutamate receptor group II pathway	1.29623e-07	2.82009e-05	1.64428	65.6823	108	516	27	35	46	BDNF,CACNA1A,CACNA1B,CACNA1E,GNAI1,GNAI2,GNAI3,GNAO1,GNB1,GNB3,GNB4,GNG12,GNG2,GNG4,GNG8,GRM2,GRM3,PRKACA,PRKACG,PRKAR1A,PRKAR2A,PRKX,SNAP23,SNAP25,SNAP29,STX1A,VAMP3	BDNF,CACNA1A,CACNA1B,CACNA1E,CACNB1,GNAI1,GNAI2,GNAI3,GNAO1,GNAT2,GNB1,GNB2,GNB3,GNB4,GNG12,GNG2,GNG4,GNG8,GRM2,GRM3,PRKACA,PRKACB,PRKACG,PRKAR1A,PRKAR2A,PRKAR2B,PRKX,SNAP23,SNAP25,SNAP29,STX1A,STX1B,VAMP1,VAMP3,VAMP8
PANTHER Pathway	Muscarinic acetylcholine receptor 2 and 4 signaling pathway	6.44211e-06	0.000700777	1.49213	78.4115	117	616	27	42	57	BCHE,CACNA2D1,CHRM2,GNAI1,GNAI2,GNAI3,GNAO1,GNB1,GNB3,GNB4,GNG12,GNG2,GNG4,GNG8,KCNJ3,KCNJ6,PRKACA,PRKACG,PRKAR1A,PRKAR2A,PRKX,SNAP23,SNAP25,SNAP29,STX16,STX1A,VAMP3	ACHE,BCHE,CACNA2D1,CHAT,CHRM2,CHRM4,GNAI1,GNAI2,GNAI3,GNAO1,GNAT1,GNAT2,GNB1,GNB2,GNB3,GNB4,GNG12,GNG2,GNG4,GNG8,KCNJ3,KCNJ6,KCNJ9,PRKACA,PRKACB,PRKACG,PRKAR1A,PRKAR2A,PRKAR2B,PRKX,SLC6A8,SNAP23,SNAP25,SNAP29,STX11,STX16,STX1A,STX1B,STX4,VAMP1,VAMP3,VAMP8
PANTHER Pathway	Gamma-aminobutyric acid synthesis	2.10986e-05	0.00183465	3.52165	3.69145	13	29	5	5	5	ABAT,ALDH5A1,CSAD,GAD1,GAD2	ABAT,ALDH5A1,CSAD,GAD1,GAD2
PANTHER Pathway	p53 pathway by glucose deprivation	3.15245e-05	0.00254429	1.93914	20.112	39	158	10	13	21	AKT2,AKT3,CDKL3,EIF4EBP1,PRKAA2,PRKAB1,PRKAG1,RHEB,TP63,TSC1	AKT2,AKT3,CDKL3,EIF4EBP1,PPP2CB,PRKAA2,PRKAB1,PRKAB2,PRKAG1,RHEB,RPS6KB1,TP63,TSC1
PANTHER Pathway	Nicotinic acetylcholine receptor signaling pathway	8.4018e-05	0.00546643	1.39291	89.7404	125	705	39	71	91	ACTBL2,ACTC1,ACTG2,BCHE,CACNA1C,CACNA1D,CACNB2,CHRFAM7A,CHRNA1,CHRNA10,CHRNA4,CHRNA7,CHRNB2,CHRNB3,MYH10,MYH11,MYH13,MYH4,MYH8,MYO10,MYO16,MYO18B,MYO1D,MYO1E,MYO3A,MYO3B,MYO5A,MYO5B,MYO5C,MYO6,MYO9A,MYO9B,SLC44A3,SNAP23,SNAP25,SNAP29,STX16,STX1A,VAMP3	ACHE,ACTA1,ACTB,ACTBL2,ACTC1,ACTG1,ACTG2,ACTR1A,BCHE,CACNA1C,CACNA1D,CACNB1,CACNB2,CHAT,CHRFAM7A,CHRNA1,CHRNA10,CHRNA2,CHRNA4,CHRNA5,CHRNA6,CHRNA7,CHRNA9,CHRNB2,CHRNB3,CHRNB4,CHRND,CHRNG,MYH10,MYH11,MYH13,MYH15,MYH2,MYH3,MYH4,MYH6,MYH7,MYH7B,MYH8,MYH9,MYO10,MYO16,MYO18A,MYO18B,MYO1A,MYO1B,MYO1C,MYO1D,MYO1E,MYO3A,MYO3B,MYO5A,MYO5B,MYO5C,MYO6,MYO9A,MYO9B,PLEKHH3,SLC44A3,SLC6A8,SNAP23,SNAP25,SNAP29,…
PANTHER Pathway	Inflammation mediated by chemokine and cytokine signaling pathway	0.000133579	0.00781357	1.2488	200.993	251	1579	78	142	202	ACTBL2,ACTC1,ACTG2,ADCY2,ADCY5,ADCY6,AKT2,AKT3,ALOX5AP,ARPC1A,CAMK2G,CASK,CCL21,CCL22,CCR4,CCR5,COL12A1,COL14A1,COL21A1,COL6A3,CX3CR1,GNB3,GNG12,GNG2,GNG4,GNG8,GRB2,ITPR1,JAK2,JUN,MAP3K2,MAP3K4,MAPK1,MRAS,MYH10,MYH11,MYH13,MYH4,MYH8,MYLK2,MYLK3,MYO3A,NFAT5,NFATC1,NFATC3,NFKBIA,PAK1,PAK3,PAK4,PAK7,PDPK1,PIK3CB,PIK3CD,PIK3CG,PLA2G4A,PLCB4,PLCD4,PLCG1,PLCL1,PLCL2,PLCZ1,PREX1,PRKACA,PRKACG,PRKCB,PRKC…	ACTA1,ACTB,ACTBL2,ACTC1,ACTG1,ACTG2,ADCY2,ADCY5,ADCY6,AKT2,AKT3,ALOX5AP,ARAF,ARPC1A,ARPC1B,ARPC2,ARPC5,ARPC5L,ARRB1,ARRB2,CAMK2A,CAMK2D,CAMK2G,CASK,CCL20,CCL21,CCL22,CCL27,CCR4,CCR5,CCR7,CCR8,CCR9,CDC42,CISH,COL12A1,COL14A1,COL21A1,COL6A3,CX3CR1,CXCR3,CXCR4,CXCR5,CYTH2,GNB3,GNG12,GNG2,GNG4,GNG8,GRAP,GRB2,GRK6,IFNAR1,IFNG,IKBKB,IL8RA,INPPL1,ITGB7,ITPR1,ITPR3,JAK2,JUN,JUNB,JUND,MAP3K2,MAP3K3,MAP3K4…
Human Phenotype	Clumsiness	9.34985e-12	9.71026e-09	3.80129	7.89207	30	62	6	7	9	C20orf54,CAPN3,CDKL5,MECP2,MTR,UBE3A	C20orf54,CAPN3,CDKL5,CLN5,MECP2,MTR,UBE3A
Human Phenotype	Microcephaly, postnatal	2.13837e-11	1.8391e-08	3.79706	7.63748	29	60	4	4	5	CDKL5,MECP2,PAFAH1B1,UBE3A	CDKL5,MECP2,PAFAH1B1,UBE3A
Human Phenotype	Progressive gait ataxia	6.60598e-11	4.84817e-08	3.85658	7.00103	27	55	4	4	4	CDKL5,MECP2,SACS,UBE3A	CDKL5,MECP2,SACS,UBE3A
Human Phenotype	Sleep-wake cycle disturbance	5.87932e-10	3.1419e-07	3.77692	6.61915	25	52	5	5	5	CDKL5,DHCR7,MECP2,PSEN2,UBE3A	CDKL5,DHCR7,MECP2,PSEN2,UBE3A
Human Phenotype	Sleep disturbances	8.89885e-10	4.49376e-07	2.13964	31.3137	67	246	12	18	25	CDKL5,DHCR7,DMPK,EHMT1,MECP2,NAGLU,NDN,PSEN2,RAI1,SLC2A1,SLITRK1,UBE3A	CDKL5,DCTN1,DDC,DHCR7,DMPK,EHMT1,GNS,MECP2,NAGLU,NDN,POMT1,PSEN2,RAI1,SLC2A1,SLC9A6,SLITRK1,SPR,UBE3A
Human Phenotype	Albinism	5.78877e-09	2.19745e-06	1.5858	95.8504	152	753	28	36	48	ADAR,AP3B1,BLM,CDKL5,COL4A1,DTNBP1,EDN3,EDNRB,GPR143,HPS1,HPS3,HPS5,HPS6,LMNA,LPAR6,LYST,MECP2,MITF,MYO5A,NDN,OCA2,PAH,PAX3,SNAI2,TP63,TSC1,TYRP1,UBE3A	ADAR,AP3B1,BLM,BLOC1S3,CDKL5,COL4A1,DTNBP1,EDN3,EDNRB,FERMT1,GPR143,HPS1,HPS3,HPS5,HPS6,KRT5,LMNA,LPAR6,LYST,MECP2,MITF,MYO5A,NDN,OCA2,PAH,PAX3,RAB27A,SNAI2,SOX10,TP63,TSC1,TYR,TYRP1,UBE3A,UBR1,UROS
Human Phenotype	Inappropriate laughter	1.01582e-08	3.45148e-06	3.29445	7.89207	26	62	5	6	7	ADSL,CDKL5,MAPT,MECP2,UBE3A	ADSL,CDKL5,MAPT,MECP2,PSEN1,UBE3A
Human Phenotype	Hyperreflexia	2.17915e-08	6.05793e-06	1.39931	181.518	254	1426	63	92	138	ABAT,ADSL,AFG3L2,ALDH18A1,ALS2,ARSA,ARX,ATL1,ATXN1,ATXN10,AUH,C20orf54,C20orf7,CDKL5,CREBBP,CYP7B1,DGUOK,EP300,ERCC3,FA2H,GAD1,GALC,GAN,GJA1,GLDC,HSD17B10,HTT,ITPR1,JPH3,KCNA1,KCNC3,KDM5C,KIAA0196,KIF5A,LARGE,LBR,LMNB1,MAT1A,MCCC1,MCPH1,MECP2,NAGA,NDUFAF2,NDUFS2,NDUFV2,NSD1,OPA3,PAH,PARK2,PDE8B,PLA2G6,PRNP,RAB3GAP1,SACS,SDHAF1,SLC25A12,SLC2A1,SPTBN2,ST3GAL5,TTBK2,UBE3A,VRK1,ZFYVE26	AAAS,ABAT,ADSL,AFG3L2,ALDH18A1,ALS2,ARSA,ARX,ATL1,ATXN1,ATXN10,ATXN7,AUH,BSCL2,C20orf54,C20orf7,C8orf38,CDKL5,CHMP2B,CREBBP,CYP7B1,DDC,DGUOK,DLD,ENPP1,EP300,ERCC3,FA2H,FAM126A,FBXO7,GAD1,GALC,GAN,GARS,GJA1,GLDC,GPR56,HEXB,HNRNPUL2,HPRT1,HSD17B10,HTT,ITPR1,JPH3,KCNA1,KCNC3,KDM5C,KIAA0196,KIF5A,LARGE,LBR,LMNB1,MAT1A,MCCC1,MCPH1,MECP2,MFN2,NAGA,NDUFAF2,NDUFAF4,NDUFS1,NDUFS2,NDUFV1,NDUFV2,NSD1,OPA3,P…
Human Phenotype	Broad-based gait	3.13798e-08	8.50855e-06	3.07408	8.78311	27	69	5	8	10	CDKL5,FLVCR1,HSD17B10,MECP2,UBE3A	CDKL5,FLVCR1,GPR56,HSD17B10,MECP2,SMS,UBE3A,VLDLR
Human Phenotype	Microbrachycephaly	3.13798e-08	8.46684e-06	3.07408	8.78311	27	69	4	4	4	CDKL5,MECP2,NIPBL,UBE3A	CDKL5,MECP2,NIPBL,UBE3A
Human Phenotype	Abnormality of skin pigmentation	1.11665e-07	2.52938e-05	1.38946	170.571	237	1340	59	89	128	ADAR,AP3B1,ATM,BEST1,BLM,CDKL5,COL4A1,CREBBP,DKC1,DTNBP1,EDAR,EDN3,EDNRB,EP300,ERCC3,ERCC4,ERCC6,FANCC,FGFR3,GNAS,HPS1,HPS3,HPS5,HPS6,INSR,KIF1B,KIT,KITLG,LIFR,LMNA,LYST,MECP2,MITF,MLH1,MSH6,MYO5A,NBN,NDN,NR0B1,OCA2,PAH,PAX3,PDGFRA,PRKAR1A,PTPN11,RBM28,RET,RHO,SEC23A,SMARCAL1,SNAI2,SPRED1,TERT,TP63,TSC1,TYRP1,UBE3A,UROD,XPA	AAAS,ABCC6,ABCD1,ADAR,AP3B1,ATM,ATP2A2,BEST1,BLM,BLOC1S3,CDKL5,COL4A1,CREBBP,DKC1,DTNBP1,EDAR,EDN3,EDNRB,EP300,ERCC3,ERCC4,ERCC6,FANCC,FERMT1,FGFR3,GJB6,GNAS,GNAS,HGD,HPS1,HPS3,HPS5,HPS6,INSR,KIF1B,KIT,KITLG,KRT14,KRT5,LIFR,LMNA,LYST,MECP2,MFRP,MITF,MLH1,MMP2,MRAP,MSH6,MVK,MYO5A,NBN,NDN,NF1,NF2,NHP2,NR0B1,OCA2,PAH,PAX3,PDGFRA,PIK3CA,PORCN,PRKAR1A,PTPN11,RAB27A,RBM28,RET,RHO,SDHB,SEC23A,SEMA4A,SLC…
Human Phenotype	Flat occiput	2.14556e-06	0.000292322	2.17903	17.4389	38	137	7	10	14	CDKL5,DYNC2H1,MECP2,PEX10,PEX14,PEX26,UBE3A	CDKL5,DCAF8,DYNC2H1,MECP2,PEX1,PEX10,PEX14,PEX26,PEX3,UBE3A
Human Phenotype	Metabolic acidosis	1.7309e-05	0.00156187	1.78699	29.6589	53	233	19	29	42	ACADS,AGXT,ALDOB,AUH,DPYS,GK,GK,HLCS,HPD,HSD17B10,INVS,MCCC1,MMAA,MUT,PCCA,PDHX,SLC17A3,SLC5A1,VPS33B	ACADM,ACADS,AGXT,ALDOB,AUH,BTD,DPYS,FBP1,GK,GK,GSS,HLCS,HPD,HSD17B10,INVS,MCCC1,MLYCD,MMAA,MMAB,MRPS22,MUT,PCCA,PCCB,PDHX,PNPO,SLC17A3,SLC5A1,UQCRB,VPS33B
Human Phenotype	Abnormality of the pyramidal tracts	2.9837e-05	0.00242946	1.42525	87.7038	125	689	38	62	94	AFG3L2,ALS2,ARSA,ATL1,ATN1,ATXN1,ATXN10,C20orf7,COL4A1,CTDP1,CYP7B1,DPYS,FA2H,FKTN,GAD1,GAN,KCNA1,KCNC3,KDM5C,KIAA0196,KIF5A,LARGE,LMNB1,MAPT,MECP2,NDUFAF2,NDUFS2,NDUFV2,OPA3,PLA2G6,PRICKLE1,SACS,SDHAF1,SLC19A3,SLC2A1,SLC6A3,SPTBN2,ZFYVE26	AAAS,AFG3L2,ALS2,ARSA,ATL1,ATN1,ATXN1,ATXN10,ATXN7,BSCL2,C20orf7,CHMP2B,COL4A1,CTDP1,CYP7B1,DDC,DPYS,FA2H,FAM126A,FBXO7,FKTN,GAD1,GAN,GPR56,HEXB,HNRNPUL2,KCNA1,KCNC3,KDM5C,KIAA0196,KIF5A,L1CAM,LARGE,LMNB1,MAPT,MECP2,MFN2,NDUFAF2,NDUFAF4,NDUFS1,NDUFS2,NDUFV1,NDUFV2,OPA3,PLA2G6,PLP1,PRICKLE1,PRKRA,PSAP,PSEN1,REEP1,SACS,SDHAF1,SLC16A2,SLC19A3,SLC2A1,SLC6A3,SOD1,SPTBN2,ZFYVE26,ZFYVE27,ZNF592
Human Phenotype	Ichthyosis	3.08309e-05	0.00249563	2.02176	17.3116	35	136	14	20	33	ABCA12,ABHD5,ALDH3A2,BRAF,CLDN1,ERCC3,GJB2,MBTPS2,POMP,SNAP29,ST14,STS,SUMF1,VPS33B	ABCA12,ABHD5,ALDH3A2,BRAF,CLDN1,COL4A5,ERCC3,FLG,GJB2,KRT1,KRT2,MAP2K1,MBTPS2,PEX7,POMP,SNAP29,ST14,STS,SUMF1,VPS33B
Human Phenotype	Acidosis	4.45256e-05	0.00334355	1.38813	99.4146	138	781	49	86	135	ACADS,AGXT,ALDOB,APTX,ATPAF2,AUH,BCKDHB,C20orf7,CA2,CABC1,COQ9,DBT,DECR1,DGUOK,DPYS,GK,GK,HADHA,HLCS,HPD,HSD17B10,INSR,INVS,MCCC1,MMAA,MRPS16,MUT,NDUFAF2,NDUFS2,NDUFV2,OCRL,OXCT1,PAH,PCCA,PDHA1,PDHX,PDSS2,POLG,SDHAF1,SLC17A3,SLC2A2,SLC4A4,SLC5A1,SUCLA2,SUCLG1,TK2,UMPS,VPS33B,WNK1	ABCC8,ACADM,ACADS,ADAMTS13,AGXT,ALDOB,APTX,ATP6V1B1,ATPAF2,AUH,BCKDHB,BTD,C20orf7,C8orf38,CA2,CABC1,CLDN16,COQ9,CPT1A,DBT,DECR1,DGUOK,DLD,DPYS,ETFA,FASTKD2,FBP1,FH,FN1,G6PC,GK,GK,GSS,HADHA,HLCS,HPD,HSD17B10,INS-IGF2,INSR,INVS,LDHA,LRPPRC,MCCC1,MCCC2,MLYCD,MMAA,MMAB,MRPS16,MRPS22,MUT,NDUFAF2,NDUFAF4,NDUFS1,NDUFS2,NDUFV1,NDUFV2,NEUROG3,OCRL,OXCT1,PAH,PAX4,PC,PCCA,PCCB,PDHA1,PDHX,PDP1,PDSS1,PDSS2,PH…
Human Phenotype	Abnormality of hair pigmentation	7.20777e-05	0.00489799	1.3845	95.3413	132	749	23	26	35	AP3B1,CDKL5,DKC1,EDN3,EDNRB,LMNA,LPAR6,LYST,MECP2,MITF,MLPH,MYO5A,NDN,OCA2,PAH,PAX3,PRKAR1A,SNAI2,TERT,TFAP2A,TP63,TYRP1,UBE3A	AP3B1,CDKL5,DKC1,EDN3,EDNRB,LMNA,LPAR6,LYST,MECP2,MITF,MLPH,MYO5A,NDN,OCA2,PAH,PAX3,PRKAR1A,RAB27A,SNAI2,SOX10,TERT,TFAP2A,TP63,TYRP1,UBE3A,UBR1
Human Phenotype	Neuroendocrine neoplasia	8.5204e-05	0.00553705	2.17293	11.9654	26	94	6	8	10	CCND1,KIF1B,PRKAR1A,RET,SDHAF2,SDHC	CCND1,KIF1B,NF1,PRKAR1A,RET,SDHAF2,SDHB,SDHC
