# Supplementary material for: Noncoding origins of anthropoid traits and a new null model of transposon functionalization
Source: HighWire-hosted journal article supplement (doi:10.1101/gr.168963.113), 2014-07-20
Supplement: Supplemental_Table_S7.xlsx [file Supplemental_Table_S7.xlsx]

## Sheet: TE-ASC GREAT
Repeat Class	Repeat Family	Rep SubFamily	Ontology	Term Name	P-value	FDR Q-value	Fold Enrichment	Expected	Foreground Region Hits	Background Region Hits	Foreground Gene Hits	Background Gene Hits	Total Genes Annotated
LINE	L1	L1MB5	InterPro	Mib-herc2	1.15925e-09	0.0101135	219.762	0.0182015	4	70	3	4	5

## Sheet: TE-AC GREAT
Repeat Class	Repeat Family	Rep SubFamily	Ontology	Term Name	P-value	FDR Q-value	Fold Enrichment	Expected	Foreground Region Hits	Background Region Hits	Foreground Gene Hits	Background Gene Hits	Total Genes Annotated
SINE	Alu	AluJb	GO Biological Process	organelle organization	7.06182e-08	0.00601117	1.83869	45.1408	83	591	75	1011	1474
SINE	Alu	AluJb	GO Biological Process	establishment of localization in cell	1.10891e-07	0.00762727	2.14389	26.1208	56	591	49	651	917
SINE	Alu	AluJb	GO Cellular Component	intracellular non-membrane-bounded organelle	1.19366e-07	0.00792712	1.61524	72.4352	117	591	104	1643	2559
SINE	Alu	AluJb	Pathway Commons	Sema4D in semaphorin signaling	2.23346e-07	0.0120319	13.1927	0.606398	8	591	3	13	18
SINE	Alu	AluJb	GO Biological Process	cellular localization	2.4552e-07	0.0126092	1.98663	31.712	63	591	56	740	1031
SINE	Alu	AluJb	GO Cellular Component	actin cytoskeleton	4.13939e-07	0.018274	3.16592	8.21245	26	591	21	231	297
SINE	Alu	AluJb	GO Molecular Function	cytoskeletal protein binding	8.17171e-07	0.0292796	2.38819	16.3304	39	591	37	410	523
SINE	Alu	AluJb	GO Molecular Function	catalytic activity	8.69693e-07	0.0308743	1.34706	152.183	205	591	183	3499	5395
SINE	Alu	AluJb	GO Biological Process	intracellular transport	8.92631e-07	0.0315433	2.31857	17.6833	41	591	37	493	696
SINE	Alu	AluJb	Pathway Commons	EPHA2 forward signaling	2.38843e-06	0.0602273	9.62288	0.831352	8	591	3	16	18
SINE	Alu	AluJb	Pathway Commons	Signaling events mediated by focal adhesion kinase	2.82359e-06	0.066723	1.98926	26.1403	52	591	39	489	620
SINE	Alu	AluJb	Pathway Commons	Signaling events mediated by Hepatocyte Growth Factor Receptor (c-Met)	4.77774e-06	0.0930609	1.95202	26.6391	52	591	39	504	637
SINE	Alu	AluSq2	GO Biological Process	peptidyl-tyrosine phosphorylation	4.21304e-06	0.0868952	21.3122	0.234608	5	71	5	39	44
SINE	Alu	AluSq2	GO Biological Process	peptidyl-tyrosine modification	4.24716e-06	0.0871324	21.2766	0.234999	5	71	5	40	46
SINE	Deu	AmnSINE1	Mouse Phenotype	abnormal eye development	9.84124e-07	0.0333242	2.45163	14.6841	36	385	23	163	191
SINE	Deu	AmnSINE1	GO Biological Process	anatomical structure development	1.06804e-06	0.035388	1.38767	113.86	158	385	127	2214	2854
SINE	Deu	AmnSINE1	Mouse Phenotype	abnormal pupillary reflex	1.54991e-06	0.045572	7.3341	1.36349	10	385	4	15	18
SINE	Deu	AmnSINE1	GO Biological Process	system development	4.8107e-06	0.0934665	1.37551	108.323	149	385	119	2040	2602
DNA	hAT-Charlie	Charlie7	InterPro	RNA helicase, DEAD-box type, Q motif	1.57925e-06	0.0459087	48.75	0.0820512	4	67	3	23	36
DNA	hAT-Charlie	Charlie7	HGNC Gene Families	DDX	1.84868e-06	0.0515061	46.8507	0.0853776	4	67	3	24	36
LINE	CR1	CR1_Mam	GO Biological Process	icosanoid metabolic process	2.41782e-06	0.0607692	16.1104	0.37243	6	181	3	27	52
LINE	CR1	CR1_Mam	GO Biological Process	unsaturated fatty acid metabolic process	2.60955e-06	0.0637172	15.8973	0.377422	6	181	3	29	55
DNA?	DNA?	Eulor6A	MGI Expression: Detected	TS24_pons	2.10699e-06	0.0557776	42.1967	0.0947942	4	16	3	19	22
SINE	Alu	FLAM_C	GO Cellular Component	cytoplasmic part	5.35307e-08	0.00502898	1.92429	29.1017	56	114	53	3507	5280
SINE	Alu	FLAM_C	GO Cellular Component	intracellular organelle part	1.51399e-06	0.044858	1.82103	28.5552	52	114	49	3197	4943
SINE	Alu	FLAM_C	GO Cellular Component	organelle part	2.38164e-06	0.0601544	1.79537	28.9633	52	114	49	3246	5013
SINE	Alu	FLAM_C	GO Cellular Component	intracellular part	3.34099e-06	0.0748183	1.3159	71.4342	94	114	90	7177	11078
LINE	L1	HAL1	InterPro	SEC7-like	4.2455e-08	0.00427522	13.0821	0.687964	9	524	4	16	16
LINE	L1	HAL1	GO Molecular Function	ARF guanyl-nucleotide exchange factor activity	5.8278e-08	0.00525085	12.6054	0.713979	9	524	4	17	17
LINE	L1	HAL1	GO Molecular Function	guanyl-nucleotide exchange factor activity	9.22915e-08	0.00677117	4.27625	4.677	20	524	14	126	156
LINE	L1	HAL1	GO Biological Process	regulation of Ras protein signal transduction	2.08603e-07	0.0117298	3.27913	7.92893	26	524	19	189	241
LINE	L1	HAL1	GO Biological Process	regulation of small GTPase mediated signal transduction	4.30703e-07	0.018852	2.92578	9.91188	29	524	21	223	281
LINE	L1	HAL1	GO Molecular Function	small GTPase regulator activity	1.06094e-06	0.0352284	2.92809	9.22103	27	524	19	233	299
LINE	L1	HAL1	GO Molecular Function	GTPase regulator activity	2.81915e-06	0.0667203	2.46786	13.3719	33	524	25	331	429
LINE	L1	HAL1	GO Molecular Function	nucleoside-triphosphatase regulator activity	4.60364e-06	0.0909343	2.41003	13.6928	33	524	25	340	438
LINE	L1	HAL1	GO Molecular Function	enzyme regulator activity	5.24183e-06	0.0997055	1.95559	26.079	51	524	43	621	881
LINE	L1	L1M5	InterPro	Krueppel-associated box	5.66043e-08	0.00516041	5.19856	3.27013	17	1140	13	87	377
LINE	L1	L1M6	GO Biological Process	negative regulation of myeloid cell differentiation	1.28492e-06	0.0398328	8.68019	1.03684	9	227	3	27	48
LINE	L1	L1MB5	InterPro	Mib-herc2	6.97541e-10	0.00019902	317.195	0.0126105	4	127	3	5	5
LINE	L1	L1MB5	InterPro	Zinc finger, ZZ-type	7.67748e-07	0.0281637	30.4995	0.163937	5	127	3	19	19
LINE	L1	L1MC4	TreeFam	Zinc finger protein	5.04578e-06	0.096813	89.608	0.0334792	3	357	3	4	23
LINE	L1	L1MC5	GO Biological Process	protein amino acid demethylation	7.61671e-08	0.0062421	29.1013	0.206176	6	299	5	12	14
LINE	L1	L1MC5	GO Biological Process	demethylation	1.93427e-06	0.0531221	16.7634	0.357922	6	299	5	16	24
LINE	L1	L1MC5	GO Biological Process	histone demethylation	2.08957e-06	0.0556032	24.8474	0.201228	5	299	4	11	13
LINE	L1	L1MD2	InterPro	Enhancer of polycomb-like	1.17776e-06	0.0374915	27.9887	0.178644	5	176	3	9	9
LINE	L1	L1MD2	GO Biological Process	histone H4 acetylation	3.43194e-06	0.0761907	22.4887	0.222334	5	176	3	20	26
LINE	L1	L1ME1	Pathway Commons	Presenilin action in Notch and Wnt signaling	3.36289e-07	0.0159423	5.61259	2.49439	14	479	9	39	46
LINE	L1	L1ME3B	Disease Ontology	ulcerative colitis	7.46195e-07	0.0279046	19.688	0.304755	6	127	4	58	97
LINE	L1	L1ME3B	Pathway Commons	TCR signaling in na&#xef;ve CD8+ T cells	9.33162e-07	0.0323086	10.8237	0.739117	8	127	6	85	111
LINE	L1	L1ME3B	Mouse Phenotype	decreased osteoclast cell number	1.11263e-06	0.0363186	13.4296	0.521235	7	127	4	32	39
LINE	L1	L1ME3B	MGI Expression: Detected	TS1_one-cell stage	2.18481e-06	0.0568607	9.64445	0.829493	8	127	4	56	73
LINE	L1	L1ME3B	Mouse Phenotype	abnormal osteoclast cell number	3.6896e-06	0.0796163	8.97722	0.891144	8	127	5	58	71
LINE	L1	L1ME4a	GO Molecular Function	excitatory extracellular ligand-gated ion channel activity	3.78169e-06	0.0809235	3.2448	6.47189	21	1278	10	41	49
LINE	L1	L1MEc	GO Biological Process	organic anion transport	9.09669e-08	0.00677071	11.9699	0.751888	9	290	3	31	43
LINE	L1	L1MEc	InterPro	Krueppel-associated box	2.12372e-07	0.0118552	10.8189	0.831876	9	290	7	87	377
LINE	L1	L1MEf	Pathway Commons	mitochondrial fatty acid beta-oxidation of unsaturated fatty acids	3.5502e-06	0.0778069	11.3169	0.618545	7	192	6	59	115
LINE	L1	L1MEf	Pathway Commons	Mitochondrial Fatty Acid Beta-Oxidation	4.91744e-06	0.0950609	10.7639	0.65032	7	192	6	62	120
LINE	L1	L1PB1	GO Cellular Component	axon terminus	9.44418e-07	0.032625	18.4977	0.324365	6	56	5	42	49
LINE	L1	L1PB1	GO Cellular Component	axon part	1.38582e-06	0.0418657	12.6449	0.553584	7	56	6	75	88
LINE	L2	L2a	GO Cellular Component	endomembrane system	1.15993e-07	0.00777006	1.34926	221.603	299	3038	203	1007	1449
LINE	L2	L2a	GO Cellular Component	organelle membrane	1.68834e-07	0.0102009	1.31404	260.265	342	3038	234	1240	1883
LINE	L2	L2a	GO Biological Process	transport	5.62636e-07	0.0226927	1.23046	406.353	500	3038	356	1880	2720
LINE	L2	L2a	GO Biological Process	establishment of localization	5.6861e-07	0.0228737	1.22818	412.805	507	3038	361	1908	2756
LINE	L2	L2a	GO Biological Process	vesicle-mediated transport	2.54137e-06	0.0629503	1.53598	81.3811	125	3038	85	443	633
LINE	L2	L2a	GO Cellular Component	subsynaptic reticulum	3.14813e-06	0.0727189	1.51506	85.8055	130	3038	85	458	710
LINE	L2	L2a	GO Cellular Component	nuclear membrane-endoplasmic reticulum network	4.47833e-06	0.0892601	1.55128	73.4877	114	3038	73	399	619
LINE	L2	L2b	Mouse Phenotype	decreased susceptibility to pharmacologically induced seizures	3.69188e-07	0.0170303	3.90293	5.12436	20	2233	7	19	21
LINE	L2	L2b	TreeFam	Glutamate receptor precursor	2.45629e-06	0.0616357	3.74681	4.80408	18	2233	4	6	6
LINE	L2	L2b	Mouse Phenotype	increased megakaryocyte cell number	2.94333e-06	0.0689183	3.87662	4.38527	17	2233	10	24	30
LINE	L2	L2b	MGI Expression: Detected	TS28_larynx connective tissue	3.30044e-06	0.0745604	5.35259	2.24191	12	2233	4	10	12
LINE	L2	L2b	MGI Expression: Detected	TS28_larynx cartilage	3.30044e-06	0.0744512	5.35259	2.24191	12	2233	4	10	11
LINE	L2	L2c	InterPro	Hemopexin/matrixin, conserved site	6.18338e-07	0.0243652	5.62502	2.3111	13	3675	4	9	17
LINE	L2	L2c	GO Biological Process	nuclear export	1.2564e-06	0.0393446	3.22308	7.13604	23	3675	12	37	62
LINE	L2	L2c	InterPro	Hemopexin/matrixin	1.94601e-06	0.0532547	5.0893	2.55438	13	3675	4	12	23
LINE	L2	L2c	InterPro	Hemopexin/matrixin, repeat	1.94601e-06	0.0531602	5.0893	2.55438	13	3675	4	12	23
LINE	L2	L2c	GO Cellular Component	organelle membrane	2.20996e-06	0.0570336	1.25462	314.837	395	3675	267	1240	1883
LINE	L2	L2c	GO Cellular Component	endomembrane system	3.71932e-06	0.0800336	1.27207	268.068	341	3675	228	1007	1449
LTR	ERV1	LTR49	Human Phenotype	Metabolic acidosis	2.35133e-06	0.0597809	116.702	0.0257065	3	20	3	28	42
DNA	hAT-Charlie	MER113	GO Molecular Function	ion transmembrane transporter activity	1.99077e-06	0.0537162	3.83911	4.42811	17	107	14	519	718
DNA	hAT-Charlie	MER113	GO Molecular Function	neurotransmitter binding	2.25768e-06	0.0578775	12.0154	0.582584	7	107	4	62	79
DNA	hAT-Charlie	MER113	GO Molecular Function	symporter activity	2.74595e-06	0.0658989	11.661	0.600291	7	107	6	101	132
DNA	hAT-Charlie	MER113	GO Molecular Function	solute:cation symporter activity	3.01246e-06	0.0701108	15.4016	0.38957	6	107	5	69	90
DNA	hAT-Charlie	MER113	GO Molecular Function	sodium ion transmembrane transporter activity	3.22687e-06	0.0737638	15.2172	0.394292	6	107	5	60	78
DNA	hAT-Charlie	MER113A	GO Biological Process	excretion	6.45654e-07	0.0251203	59.7879	0.0669031	4	32	3	36	58
DNA	TcMar?	MER121	GO Biological Process	reproductive process	7.13631e-13	1.0995e-05	2.69802	23.3505	63	350	38	603	871
DNA	TcMar?	MER121	GO Biological Process	reproduction	7.23879e-13	5.57644e-06	2.69713	23.3582	63	350	38	604	874
DNA	TcMar?	MER121	Mouse Phenotype	abnormal limbs/digits/tail morphology	8.62105e-13	4.42751e-06	2.53295	27.2409	69	350	49	538	653
DNA	TcMar?	MER121	GO Biological Process	reproductive developmental process	1.0311e-12	3.97156e-06	3.42197	13.1503	45	350	25	256	332
DNA	TcMar?	MER121	GO Biological Process	positive regulation of biosynthetic process	1.08874e-12	3.35485e-06	2.32271	34.012	79	350	50	645	799
DNA	TcMar?	MER121	GO Biological Process	positive regulation of transcription from RNA polymerase II promoter	1.82148e-12	4.6773e-06	2.69619	22.6245	61	350	36	356	422
DNA	TcMar?	MER121	GO Biological Process	positive regulation of transcription, DNA-dependent	1.99381e-12	4.38841e-06	2.48695	27.7448	69	350	42	454	536
DNA	TcMar?	MER121	MGI Expression: Detected	TS24_forelimb	2.07245e-12	3.9913e-06	6.26849	3.82867	24	350	11	56	68
DNA	TcMar?	MER121	GO Biological Process	positive regulation of RNA metabolic process	2.15105e-12	3.68238e-06	2.4828	27.7912	69	350	42	459	543
DNA	TcMar?	MER121	GO Biological Process	positive regulation of macromolecule biosynthetic process	2.49694e-12	3.84706e-06	2.31853	33.2108	77	350	48	601	737
DNA	TcMar?	MER121	Mouse Phenotype	abnormal jaw morphology	4.09535e-12	5.73614e-06	3.40382	12.6329	43	350	27	179	201
DNA	TcMar?	MER121	GO Biological Process	positive regulation of cellular biosynthetic process	5.59205e-12	7.17977e-06	2.2806	33.763	77	350	49	635	787
DNA	TcMar?	MER121	GO Biological Process	organ morphogenesis	5.81274e-12	6.88904e-06	2.34942	31.0715	73	350	47	575	694
DNA	TcMar?	MER121	Mouse Phenotype	abnormal skeleton morphology	8.51019e-12	9.36553e-06	2.16993	38.25	83	350	56	814	1003
DNA	TcMar?	MER121	Mouse Phenotype	skeleton phenotype	9.19479e-12	9.44434e-06	2.15283	39.0185	84	350	57	857	1074
DNA	TcMar?	MER121	GO Biological Process	positive regulation of nitrogen compound metabolic process	9.47709e-12	9.12591e-06	2.28945	32.759	75	350	47	611	745
DNA	TcMar?	MER121	Mouse Phenotype	abnormal facial morphology	9.50601e-12	8.61531e-06	2.59031	23.5493	61	350	40	388	453
DNA	TcMar?	MER121	GO Biological Process	positive regulation of metabolic process	1.19532e-11	1.02314e-05	2.11552	40.6519	86	350	55	847	1099
DNA	TcMar?	MER121	InterPro	Transforming growth factor-beta, C-terminal	1.27563e-11	1.03441e-05	10.0205	1.59673	16	350	6	26	38
DNA	TcMar?	MER121	GO Biological Process	positive regulation of cellular metabolic process	1.3352e-11	1.02858e-05	2.15083	38.5898	83	350	53	806	1042
DNA	TcMar?	MER121	GO Biological Process	positive regulation of transcription	1.54635e-11	1.08294e-05	2.31853	31.0541	72	350	44	532	631
DNA	TcMar?	MER121	GO Biological Process	positive regulation of macromolecule metabolic process	1.58607e-11	1.06247e-05	2.13006	39.4355	84	350	53	788	1013
DNA	TcMar?	MER121	GO Biological Process	positive regulation of nucleobase, nucleoside, nucleotide and nucleic acid metabolic process	1.9411e-11	1.24611e-05	2.27178	32.5736	74	350	46	597	724
DNA	TcMar?	MER121	MGI Expression: Detected	TS22_forelimb;cartilage condensation#	2.3741e-11	1.46312e-05	7.46077	2.54666	19	350	8	40	46
DNA	TcMar?	MER121	GO Biological Process	reproductive structure development	2.43319e-11	1.44186e-05	3.90634	8.70381	34	350	18	146	188
DNA	TcMar?	MER121	GO Biological Process	positive regulation of gene expression	4.3182e-11	2.46411e-05	2.24948	32.452	73	350	45	556	661
DNA	TcMar?	MER121	Mouse Phenotype	abnormal viscerocranium morphology	4.96176e-11	2.73023e-05	2.99346	15.3668	46	350	30	226	257
DNA	TcMar?	MER121	MGI Expression: Detected	TS20_axial skeleton	5.27574e-11	2.80289e-05	5.34872	4.48706	24	350	13	77	86
DNA	TcMar?	MER121	GO Biological Process	regulation of cell differentiation	8.00815e-11	4.11275e-05	2.38834	26.7968	64	350	42	485	609
DNA	TcMar?	MER121	GO Biological Process	endocrine process	9.82034e-11	4.88074e-05	12.2199	1.06384	13	350	5	18	26
DNA	TcMar?	MER121	MGI Expression: Detected	TS24_limb	1.24832e-10	6.01034e-05	4.37471	6.40043	28	350	14	122	148
DNA	TcMar?	MER121	GO Biological Process	regulation of cell proliferation	1.26387e-10	5.9008e-05	2.26444	30.471	69	350	45	685	911
DNA	TcMar?	MER121	GO Biological Process	organ development	1.37045e-10	6.21019e-05	1.69421	74.9612	127	350	92	1524	1956
DNA	TcMar?	MER121	Mouse Phenotype	abnormal limb morphology	1.38419e-10	6.09325e-05	2.67215	19.46	52	350	37	374	430
DNA	TcMar?	MER121	Mouse Phenotype	abnormal blood vessel morphology	1.60725e-10	6.87864e-05	2.34791	27.2583	64	350	47	596	746
DNA	TcMar?	MER121	Mouse Phenotype	abnormal cardiovascular system morphology	1.94541e-10	8.10086e-05	2.0262	41.457	84	350	61	939	1179
DNA	TcMar?	MER121	Mouse Phenotype	abnormal craniofacial morphology	2.32531e-10	9.42797e-05	2.09429	37.2441	78	350	54	628	758
DNA	TcMar?	MER121	MGI Expression: Detected	TS22_limb	2.57054e-10	0.00010155	2.03852	40.2252	82	350	58	756	953
DNA	TcMar?	MER121	MGI Expression: Detected	Theiler_stage_13	2.72291e-10	0.000104881	1.92759	47.7281	92	350	64	957	1250
DNA	TcMar?	MER121	MGI Expression: Detected	TS20_maxilla	3.11197e-10	0.000116943	9.83864	1.42296	14	350	6	11	11
DNA	TcMar?	MER121	GO Biological Process	regulation of developmental process	3.46048e-10	0.000126943	2.16269	33.2919	72	350	49	673	857
DNA	TcMar?	MER121	MGI Expression: Detected	TS20_embryo;skeleton	3.96995e-10	0.000142245	4.63434	5.39451	25	350	14	99	110
DNA	TcMar?	MER121	GO Biological Process	skeletal system development	4.34086e-10	0.000152	2.97826	14.1022	42	350	29	299	362
DNA	TcMar?	MER121	InterPro	Transforming growth factor-beta, N-terminal	4.85487e-10	0.000166221	9.50338	1.47316	14	350	5	23	29
DNA	TcMar?	MER121	InterPro	Transforming growth factor-beta-related	4.93696e-10	0.000165357	9.49094	1.47509	14	350	5	24	33
DNA	TcMar?	MER121	InterPro	Transforming growth factor beta, conserved site	4.93696e-10	0.000161839	9.49094	1.47509	14	350	5	24	33
DNA	TcMar?	MER121	GO Biological Process	ovulation cycle	5.20645e-10	0.000167117	4.98222	4.61642	23	350	10	76	91
DNA	TcMar?	MER121	GO Biological Process	positive regulation of cellular process	5.35034e-10	0.000168231	1.72795	66.5528	115	350	80	1603	2143
DNA	TcMar?	MER121	MGI Expression: Detected	TS13_embryo	5.52347e-10	0.000170201	1.92065	46.8592	90	350	62	932	1208
DNA	TcMar?	MER121	MGI Expression: Detected	TS20_limb	5.83842e-10	0.000176379	2.53397	20.9158	53	350	32	286	337
DNA	TcMar?	MER121	GO Biological Process	anatomical structure formation involved in morphogenesis	6.33969e-10	0.000187839	2.65385	18.4637	49	350	32	352	424
DNA	TcMar?	MER121	GO Biological Process	anatomical structure morphogenesis	6.55975e-10	0.000190692	1.80349	57.1115	103	350	72	1089	1343
DNA	TcMar?	MER121	GO Biological Process	ovulation cycle process	7.83102e-10	0.00021937	5.37914	3.90397	21	350	8	69	82
DNA	TcMar?	MER121	Mouse Phenotype	abnormal cranium morphology	8.39749e-10	0.000231038	2.5365	20.5007	52	350	35	329	382
DNA	TcMar?	MER121	Disease Ontology	pre-eclampsia	8.68952e-10	0.000234878	5.3474	3.92714	21	350	9	135	205
DNA	TcMar?	MER121	MGI Expression: Detected	TS15_embryo;mesenchyme	9.13243e-10	0.000242594	2.5603	19.9195	51	350	37	296	339
DNA	TcMar?	MER121	Mouse Phenotype	abnormal head morphology	9.45039e-10	0.000246785	2.24624	28.492	64	350	43	479	566
DNA	TcMar?	MER121	GO Biological Process	anatomical structure development	1.05446e-09	0.000270769	1.51677	103.509	157	350	119	2214	2854
DNA	TcMar?	MER121	GO Biological Process	negative regulation of myeloid leukocyte differentiation	1.24646e-09	0.000314825	11.3004	1.06191	12	350	4	15	22
DNA	TcMar?	MER121	GO Biological Process	embryonic digit morphogenesis	1.24856e-09	0.000310269	7.29485	2.19333	16	350	6	33	35
DNA	TcMar?	MER121	GO Biological Process	system development	1.3646e-09	0.000333722	1.53337	98.4758	151	350	114	2040	2602
DNA	TcMar?	MER121	GO Biological Process	embryonic development	1.9575e-09	0.000471241	2.2232	28.3376	63	350	43	549	667
DNA	TcMar?	MER121	GO Biological Process	development of primary sexual characteristics	1.98777e-09	0.000471165	3.63633	8.25008	30	350	15	128	166
DNA	TcMar?	MER121	GO Biological Process	embryonic morphogenesis	2.05047e-09	0.000478665	2.59237	18.5159	48	350	32	325	366
DNA	TcMar?	MER121	Mouse Phenotype	abnormal thoracic cage morphology	2.17006e-09	0.00049902	3.02002	12.5827	38	350	26	240	281
DNA	TcMar?	MER121	GO Biological Process	positive regulation of biological process	2.45376e-09	0.000547904	1.66246	71.5805	119	350	84	1748	2358
DNA	TcMar?	MER121	GO Biological Process	regulation of gene-specific transcription from RNA polymerase II promoter	2.51416e-09	0.000553371	3.81535	7.33877	28	350	13	132	160
DNA	TcMar?	MER121	GO Biological Process	positive regulation of branching involved in ureteric bud morphogenesis	2.76557e-09	0.000600132	17.9977	0.500063	9	350	3	4	5
DNA	TcMar?	MER121	Mouse Phenotype	abnormal craniofacial bone morphology	2.96278e-09	0.000633999	2.44353	21.2807	52	350	35	343	399
DNA	TcMar?	MER121	GO Biological Process	sensory organ development	3.36201e-09	0.000709574	2.734	15.7279	43	350	27	235	273
DNA	TcMar?	MER121	GO Biological Process	positive regulation of developmental process	3.79285e-09	0.000789687	2.68296	16.3998	44	350	26	300	367
DNA	TcMar?	MER121	GO Biological Process	negative regulation of developmental process	4.23335e-09	0.00086965	2.84423	14.0636	40	350	22	241	323
DNA	TcMar?	MER121	MGI Expression: Detected	TS19_organ system	5.12402e-09	0.00103877	1.78003	54.4934	97	350	68	871	1051
DNA	TcMar?	MER121	Mouse Phenotype	abnormal skeleton extremities morphology	5.21341e-09	0.00104316	2.69301	15.9673	43	350	30	292	350
DNA	TcMar?	MER121	MGI Expression: Detected	TS17_limb	6.1813e-09	0.00120552	2.31672	23.7405	55	350	41	385	472
DNA	TcMar?	MER121	Mouse Phenotype	skin/coat/nails phenotype	6.65861e-09	0.00128237	2.20726	27.183	60	350	42	659	875
DNA	TcMar?	MER121	Mouse Phenotype	abnormal rib morphology	6.79367e-09	0.00129223	3.44295	8.71346	30	350	20	177	210
DNA	TcMar?	MER121	Mouse Phenotype	lethality-prenatal/perinatal	7.14419e-09	0.00134233	1.60375	77.9423	125	350	90	1720	2165
DNA	TcMar?	MER121	MGI Expression: Detected	TS17_hindlimb bud	7.52743e-09	0.0013973	3.26001	9.81592	32	350	21	114	120
DNA	TcMar?	MER121	GO Biological Process	cell differentiation	7.90779e-09	0.00145043	1.65697	68.8002	114	350	83	1406	1799
DNA	TcMar?	MER121	GO Biological Process	urogenital system development	8.13582e-09	0.0014747	3.24915	9.84874	32	350	20	129	149
DNA	TcMar?	MER121	GO Biological Process	female sex differentiation	8.54638e-09	0.00151351	4.68618	4.48126	21	350	9	71	90
DNA	TcMar?	MER121	Mouse Phenotype	abnormal mouth morphology	8.76575e-09	0.00153471	2.53808	18.1239	46	350	29	304	349
DNA	TcMar?	MER121	GO Biological Process	negative regulation of cell differentiation	8.8658e-09	0.00153479	2.97236	12.1116	36	350	19	202	266
DNA	TcMar?	MER121	PANTHER Pathway	TGF-beta signaling pathway	8.87495e-09	0.0015193	5.19301	3.65877	19	350	9	77	93
DNA	TcMar?	MER121	GO Biological Process	gonad development	9.47791e-09	0.00158725	3.81589	6.81361	26	350	13	109	147
DNA	TcMar?	MER121	MGI Expression: Detected	TS25_pancreas	9.48549e-09	0.00157144	5.17118	3.67421	19	350	10	59	69
DNA	TcMar?	MER121	Mouse Phenotype	abnormal orofacial morphology	9.80181e-09	0.00160657	2.52865	18.1915	46	350	29	307	352
DNA	TcMar?	MER121	GO Biological Process	mesenchymal to epithelial transition involved in metanephros morphogenesis	1.03553e-08	0.00166194	12.6634	0.789675	10	350	4	5	5
DNA	TcMar?	MER121	GO Biological Process	tissue development	1.03735e-08	0.00164768	2.11106	30.3166	64	350	42	630	811
DNA	TcMar?	MER121	MGI Expression: Detected	TS25_gut;gland	1.08245e-08	0.00170178	5.12806	3.7051	19	350	10	61	72
DNA	TcMar?	MER121	GO Biological Process	morphogenesis of a branching epithelium	1.14102e-08	0.00177574	3.78054	6.87732	26	350	14	98	109
DNA	TcMar?	MER121	GO Biological Process	developmental process	1.16811e-08	0.00179972	1.43343	117.899	169	350	128	2623	3440
DNA	TcMar?	MER121	GO Biological Process	sex differentiation	1.16926e-08	0.00178365	3.27606	9.46259	31	350	16	153	197
DNA	TcMar?	MER121	Mouse Phenotype	abnormal artery morphology	1.1787e-08	0.00178042	2.73967	14.6003	40	350	27	276	346
DNA	TcMar?	MER121	GO Biological Process	multicellular organismal development	1.18075e-08	0.00176621	1.4507	112.36	163	350	123	2437	3162
DNA	TcMar?	MER121	Disease Ontology	bone inflammation disease	1.26208e-08	0.00186972	3.64362	7.41021	27	350	16	224	336
DNA	TcMar?	MER121	MGI Expression: Detected	TS19_embryo	1.26633e-08	0.00185814	1.64341	69.3679	114	350	82	1228	1530
DNA	TcMar?	MER121	Mouse Phenotype	abnormal prostate gland anterior lobe morphology	1.38981e-08	0.0020012	12.2733	0.814775	10	350	4	16	17
DNA	TcMar?	MER121	Mouse Phenotype	abnormal appendicular skeleton morphology	1.39121e-08	0.00198468	2.60238	16.5233	43	350	30	310	370
DNA	TcMar?	MER121	GO Biological Process	development of primary female sexual characteristics	1.39547e-08	0.00197249	4.7824	4.182	20	350	8	69	85
DNA	TcMar?	MER121	MGI Expression: Detected	TS15_branchial arch	1.4081e-08	0.00197225	2.86451	12.9167	37	350	27	216	256
DNA	TcMar?	MER121	GO Biological Process	nephron epithelium development	1.46026e-08	0.00202688	10.3775	1.05998	11	350	5	7	7
DNA	TcMar?	MER121	MGI Expression: Detected	Theiler_stage_19	1.46249e-08	0.00201185	1.63926	69.5436	114	350	82	1234	1545
DNA	TcMar?	MER121	MGI Expression: Detected	TS20_alimentary system;oral region	1.48829e-08	0.00202923	2.96883	11.7891	35	350	23	176	203
DNA	TcMar?	MER121	Mouse Phenotype	cleft secondary palate	1.52308e-08	0.00205844	3.40824	8.5088	29	350	17	109	123
DNA	TcMar?	MER121	GO Biological Process	regulation of transcription from RNA polymerase II promoter	1.57852e-08	0.00211483	1.98796	35.715	71	350	43	641	790
DNA	TcMar?	MER121	Disease Ontology	glandular and epithelial neoplasm	1.62685e-08	0.00216078	2.17156	27.1695	59	350	38	705	995
DNA	TcMar?	MER121	GO Biological Process	cellular developmental process	1.63292e-08	0.0021503	1.63608	69.6787	114	350	83	1442	1850
DNA	TcMar?	MER121	Mouse Phenotype	abnormal skeleton development	1.85322e-08	0.00241973	2.50721	17.9482	45	350	30	375	449
DNA	TcMar?	MER121	Mouse Phenotype	abnormal vertebral arch morphology	1.8805e-08	0.00243471	5.24638	3.43094	18	350	11	69	80
DNA	TcMar?	MER121	MGI Expression: Detected	TS20_forelimb	1.88284e-08	0.00241743	2.73631	14.2528	39	350	22	190	211
DNA	TcMar?	MER121	Mouse Phenotype	abnormal mandible morphology	1.93443e-08	0.00246314	3.28361	9.13629	30	350	19	129	142
DNA	TcMar?	MER121	GO Biological Process	metanephros morphogenesis	2.09999e-08	0.00265203	11.7445	0.851459	10	350	4	6	6
DNA	TcMar?	MER121	MGI Expression: Detected	TS17_3rd arch;branchial pouch;endoderm	2.10955e-08	0.00264245	18.0151	0.444072	8	350	3	9	10
DNA	TcMar?	MER121	Mouse Phenotype	perinatal lethality	2.23794e-08	0.00278065	1.78917	49.7438	89	350	62	839	1017
DNA	TcMar?	MER121	GO Biological Process	rhythmic process	2.43325e-08	0.00299915	3.63856	7.14569	26	350	13	138	166
DNA	TcMar?	MER121	Mouse Phenotype	abnormal craniofacial development	2.44925e-08	0.0029949	2.55082	16.8574	43	350	28	238	282
DNA	TcMar?	MER121	MGI Expression: Detected	TS21_handplate;digit#;mesenchyme#	2.50393e-08	0.00303766	9.83986	1.1179	11	350	4	12	12
DNA	TcMar?	MER121	MGI Expression: Detected	TS20_trachea;associated mesenchyme	2.50393e-08	0.00301393	9.83986	1.1179	11	350	4	10	10
DNA	TcMar?	MER121	GO Biological Process	mesenchyme development	2.52348e-08	0.0029679	4.03813	5.6957	23	350	14	64	72
DNA	TcMar?	MER121	Mouse Phenotype	abnormal coat/ hair morphology	2.53588e-08	0.00295989	2.62229	15.6352	41	350	28	334	442
DNA	TcMar?	MER121	MGI Expression: Detected	TS28_decidua	2.68551e-08	0.00311097	5.45532	3.11623	17	350	8	89	106
DNA	TcMar?	MER121	Mouse Phenotype	abnormal respiratory system morphology	2.79527e-08	0.00319015	2.3301	21.4583	50	350	35	428	528
DNA	TcMar?	MER121	Mouse Phenotype	abnormal axial skeleton morphology	2.84632e-08	0.00320099	2.08614	29.72	62	350	43	578	694
DNA	TcMar?	MER121	Mouse Phenotype	abnormal cardiovascular development	2.86289e-08	0.00319629	2.15512	26.9127	58	350	41	488	573
DNA	TcMar?	MER121	GO Biological Process	pituitary gland development	2.90649e-08	0.00322163	5.8154	2.75131	16	350	6	31	34
DNA	TcMar?	MER121	MGI Expression: Detected	TS15_trunk mesenchyme	3.15992e-08	0.00347751	2.64084	15.1467	40	350	28	231	266
DNA	TcMar?	MER121	MGI Expression: Detected	TS20_mandibular process;mesenchyme	3.2187e-08	0.00349231	8.4103	1.42682	12	350	3	13	14
DNA	TcMar?	MER121	Mouse Phenotype	abnormal embryonic tissue morphology	3.35078e-08	0.0036102	2.00263	33.456	67	350	43	653	798
DNA	TcMar?	MER121	GO Biological Process	negative regulation of multicellular organismal process	3.44301e-08	0.00368381	4.13146	5.325	22	350	9	138	188
DNA	TcMar?	MER121	GO Biological Process	odontogenesis	3.65864e-08	0.00388752	5.01766	3.58733	18	350	8	60	71
DNA	TcMar?	MER121	GO Biological Process	regulation of myeloid leukocyte differentiation	3.90111e-08	0.00411677	6.69536	2.091	14	350	6	36	50
DNA	TcMar?	MER121	Mouse Phenotype	abnormal digestive system morphology	4.13889e-08	0.00427975	2.0806	29.3184	61	350	39	569	703
DNA	TcMar?	MER121	MGI Expression: Detected	TS17_visceral organ	4.15531e-08	0.00423982	2.46983	17.815	44	350	28	300	405
DNA	TcMar?	MER121	MGI Expression: Detected	TS17_alimentary system	4.22867e-08	0.00428629	2.84401	12.3066	35	350	20	199	269
DNA	TcMar?	MER121	GO Biological Process	negative regulation of cellular process	4.51266e-08	0.00448561	1.66092	62.6161	104	350	70	1484	1969
DNA	TcMar?	MER121	Disease Ontology	bone disease	4.92085e-08	0.00479849	3.14535	9.53789	30	350	19	273	402
DNA	TcMar?	MER121	GO Biological Process	positive regulation of cell proliferation	4.98002e-08	0.00482565	2.59584	15.4093	40	350	26	381	493
DNA	TcMar?	MER121	GO Biological Process	epithelium development	5.01914e-08	0.00483315	2.45334	17.9347	44	350	30	289	363
DNA	TcMar?	MER121	Mouse Phenotype	abnormal forelimb morphology	5.10258e-08	0.00488298	3.5032	7.42179	26	350	18	132	141
DNA	TcMar?	MER121	Human Phenotype	Aplasia/Hypoplasia of the middle phalanges of the hand	5.18984e-08	0.00493583	10.6571	0.938343	10	350	5	17	19
DNA	TcMar?	MER121	GO Biological Process	tissue morphogenesis	5.31922e-08	0.00502784	2.58935	15.4479	40	350	25	253	297
DNA	TcMar?	MER121	Disease Ontology	myomatous neoplasm	5.37006e-08	0.00501437	5.55798	2.87874	16	350	8	73	92
DNA	TcMar?	MER121	MGI Expression: Detected	TS19_hindlimb bud	5.3757e-08	0.0049894	3.05944	10.1326	31	350	17	127	134
DNA	TcMar?	MER121	GO Biological Process	mesenchymal to epithelial transition	5.59931e-08	0.00513507	10.5701	0.946066	10	350	4	8	8
DNA	TcMar?	MER121	MGI Expression: Detected	TS19_limb	5.78132e-08	0.00523962	2.30047	21.3	49	350	33	287	319
DNA	TcMar?	MER121	Disease Ontology	tissue disease	6.15033e-08	0.00547739	2.10749	27.5209	58	350	38	779	1117
DNA	TcMar?	MER121	GO Biological Process	regulation of kidney development	6.34894e-08	0.00562177	12.4971	0.720169	9	350	3	7	8
DNA	TcMar?	MER121	MGI Expression: Detected	TS17_branchial arch	6.41403e-08	0.00564695	2.29257	21.3734	49	350	35	339	434
DNA	TcMar?	MER121	MGI Expression: Detected	TS18_3rd arch;branchial pouch	6.46529e-08	0.00565974	15.577	0.513579	8	350	3	5	6
DNA	TcMar?	MER121	GO Biological Process	regulation of myeloid cell differentiation	6.6706e-08	0.0057416	4.81799	3.736	18	350	8	64	95
DNA	TcMar?	MER121	GO Cellular Component	extracellular region part	6.7912e-08	0.00581293	2.28823	21.4139	49	350	35	670	1014
DNA	TcMar?	MER121	MGI Expression: Detected	TS20_embryo;mesenchyme	7.1708e-08	0.0060704	3.34231	8.07824	27	350	17	116	133
DNA	TcMar?	MER121	MGI Expression: Detected	TS20_trachea	7.20507e-08	0.00606608	6.99911	1.85738	13	350	5	22	24
DNA	TcMar?	MER121	Mouse Phenotype	abnormal lung morphology	7.48496e-08	0.00620008	2.59499	15.0289	39	350	27	325	400
DNA	TcMar?	MER121	GO Biological Process	cartilage development	7.57248e-08	0.00623904	4.52448	4.19937	19	350	11	76	87
DNA	TcMar?	MER121	GO Biological Process	kidney epithelium development	7.63941e-08	0.00622758	8.80568	1.24919	11	350	5	9	9
DNA	TcMar?	MER121	Disease Ontology	malignant neoplasm of female genital organ	8.04687e-08	0.00645724	3.23276	8.66133	28	350	15	235	341
DNA	TcMar?	MER121	GO Biological Process	morphogenesis of an epithelium	8.20752e-08	0.00655202	2.71683	13.2507	36	350	22	197	227
DNA	TcMar?	MER121	Disease Ontology	reproductive system disease	8.25711e-08	0.00655764	2.22664	22.9045	51	350	34	583	849
DNA	TcMar?	MER121	Disease Ontology	hypertension	8.29608e-08	0.0065548	3.9251	5.60496	22	350	10	192	274
DNA	TcMar?	MER121	MGI Expression: Detected	TS17_nose	8.61542e-08	0.00670398	3.31144	8.15354	27	350	14	118	131
DNA	TcMar?	MER121	GO Biological Process	embryonic limb morphogenesis	8.69408e-08	0.00673119	3.91431	5.6204	22	350	12	90	95
DNA	TcMar?	MER121	MGI Expression: Detected	TS25_hair	8.86709e-08	0.00683081	7.6542	1.56777	12	350	3	16	19
DNA	TcMar?	MER121	MGI Expression: Detected	TS25_hair;follicle	8.86709e-08	0.00679682	7.6542	1.56777	12	350	3	16	18
DNA	TcMar?	MER121	Disease Ontology	female reproductive cancer	8.88595e-08	0.00677756	3.21698	8.70381	28	350	15	239	351
DNA	TcMar?	MER121	Human Phenotype	Abnormality of the middle phalanges of the hand	8.98451e-08	0.00678556	7.64479	1.5697	12	350	6	20	22
DNA	TcMar?	MER121	GO Biological Process	positive regulation of cell differentiation	9.00822e-08	0.00677028	2.75539	12.7024	35	350	20	229	270
DNA	TcMar?	MER121	MGI Expression: Detected	TS20_visceral organ	9.07879e-08	0.00679019	1.8688	39.5977	74	350	53	707	896
DNA	TcMar?	MER121	Disease Ontology	soft tissue neoplasm	9.16089e-08	0.00678571	2.5361	15.7723	40	350	23	429	595
DNA	TcMar?	MER121	MGI Expression: Detected	TS23_pancreas	9.25738e-08	0.00675969	3.62192	6.62632	24	350	14	109	141
DNA	TcMar?	MER121	Disease Ontology	mesenchymal cell neoplasm	9.27827e-08	0.00674298	2.53485	15.78	40	350	23	430	599
DNA	TcMar?	MER121	MGI Expression: Detected	TS19_branchial arch	9.29367e-08	0.00672247	3.20986	8.72311	28	350	19	106	126
DNA	TcMar?	MER121	Mouse Phenotype	abnormal prostate gland morphology	9.76599e-08	0.00703111	6.81492	1.90758	13	350	7	47	62
DNA	TcMar?	MER121	MGI Expression: Detected	Theiler_stage_15	1.02929e-07	0.00737601	1.64004	62.8033	103	350	78	1201	1531
DNA	TcMar?	MER121	GO Biological Process	epithelial cell morphogenesis	1.0584e-07	0.00741221	9.86542	1.01364	10	350	4	13	14
DNA	TcMar?	MER121	Mouse Phenotype	abnormal cartilage morphology	1.08379e-07	0.00755565	2.59788	14.6273	38	350	28	251	291
DNA	TcMar?	MER121	GO Biological Process	negative regulation of myeloid cell differentiation	1.09207e-07	0.00757912	7.50629	1.59866	12	350	4	27	48
DNA	TcMar?	MER121	MGI Expression: Detected	TS21_forelimb	1.10323e-07	0.00762224	2.89703	11.0458	32	350	16	136	152
DNA	TcMar?	MER121	GO Molecular Function	cytokine activity	1.11141e-07	0.00761047	5.2649	3.039	16	350	7	108	205
DNA	TcMar?	MER121	GO Biological Process	embryonic organ development	1.11903e-07	0.00759514	2.78151	12.2236	34	350	22	210	237
DNA	TcMar?	MER121	MGI Expression: Detected	TS20_mandibular process	1.13558e-07	0.00767367	3.58122	6.70162	24	350	13	90	102
DNA	TcMar?	MER121	MGI Expression: Detected	TS22_forelimb	1.20961e-07	0.00799856	1.97461	32.4114	64	350	44	596	739
DNA	TcMar?	MER121	Mouse Phenotype	digestive/alimentary phenotype	1.20962e-07	0.00796443	1.96107	33.1451	65	350	41	713	909
DNA	TcMar?	MER121	Disease Ontology	genitourinary cancer	1.21976e-07	0.00799701	2.1567	24.5745	53	350	36	604	866
DNA	TcMar?	MER121	MGI Expression: Detected	TS25_skin#	1.25997e-07	0.00819091	6.07802	2.30338	14	350	5	69	81
DNA	TcMar?	MER121	Disease Ontology	female genital cancer	1.34772e-07	0.0087246	2.87093	11.1462	32	350	18	294	426
DNA	TcMar?	MER121	GO Biological Process	growth	1.35924e-07	0.00876232	3.1499	8.88916	28	350	14	190	240
DNA	TcMar?	MER121	MGI Expression: Detected	TS19_renal/urinary system	1.36233e-07	0.00874567	3.07097	9.44328	29	350	16	142	174
DNA	TcMar?	MER121	Disease Ontology	rhabdomyosarcoma	1.38107e-07	0.00882915	11.3971	0.789675	9	350	4	23	31
DNA	TcMar?	MER121	GO Biological Process	kidney morphogenesis	1.38726e-07	0.00879575	8.29298	1.32642	11	350	5	7	7
DNA	TcMar?	MER121	GO Biological Process	morphogenesis of a branching structure	1.40878e-07	0.00885928	3.22961	8.36013	27	350	15	121	133
DNA	TcMar?	MER121	GO Biological Process	positive regulation of gene-specific transcription from RNA polymerase II promoter	1.42694e-07	0.00893702	4.13685	4.83459	20	350	11	87	105
DNA	TcMar?	MER121	MGI Expression: Detected	TS15_organ system	1.43759e-07	0.00896727	1.82727	41.5921	76	350	56	670	785
DNA	TcMar?	MER121	Disease Ontology	muscle tissue neoplasm	1.56527e-07	0.00968524	5.13124	3.11816	16	350	8	77	99
DNA	TcMar?	MER121	Mouse Phenotype	abnormal eye morphology	1.57188e-07	0.00968726	1.92146	34.8693	67	350	49	662	810
DNA	TcMar?	MER121	Mouse Phenotype	abnormal osteogenesis	1.59472e-07	0.00978886	2.91027	10.6519	31	350	20	195	229
DNA	TcMar?	MER121	MGI Expression: Detected	TS20_palatal shelf	1.66423e-07	0.010175	5.93864	2.35744	14	350	5	31	35
DNA	TcMar?	MER121	Human Phenotype	Abnormality of the scrotum	1.67228e-07	0.0101838	6.49918	2.00025	13	350	5	18	25
DNA	TcMar?	MER121	Mouse Phenotype	cardiovascular system phenotype	1.70609e-07	0.0102679	1.71158	51.9989	89	350	65	1194	1522
DNA	TcMar?	MER121	GO Biological Process	osteoblast differentiation	1.80421e-07	0.0107327	5.44812	2.75325	15	350	7	38	45
DNA	TcMar?	MER121	MGI Expression: Detected	TS21_trachea	1.88091e-07	0.0110608	13.5408	0.590809	8	350	3	9	13
DNA	TcMar?	MER121	Disease Ontology	rheumatoid arthritis	1.96574e-07	0.0113859	3.59459	6.3985	23	350	14	203	301
DNA	TcMar?	MER121	GO Biological Process	regulation of gene-specific transcription	2.00369e-07	0.0115622	2.87948	10.7658	31	350	16	183	218
DNA	TcMar?	MER121	GO Biological Process	female gonad development	2.00703e-07	0.0114954	4.72872	3.59505	17	350	7	62	78
DNA	TcMar?	MER121	GO Biological Process	ovarian follicle development	2.00927e-07	0.0114656	6.39425	2.03308	13	350	4	43	52
DNA	TcMar?	MER121	GO Biological Process	bone development	2.01772e-07	0.0114713	3.58918	6.40815	23	350	14	127	152
DNA	TcMar?	MER121	GO Biological Process	limb morphogenesis	2.06021e-07	0.0116271	3.58486	6.41587	23	350	13	103	112
DNA	TcMar?	MER121	MGI Expression: Detected	TS20_respiratory tract;lower	2.11936e-07	0.0118739	6.36403	2.04273	13	350	5	24	26
DNA	TcMar?	MER121	GO Biological Process	gland development	2.14957e-07	0.0118705	2.81056	11.3856	32	350	18	186	214
DNA	TcMar?	MER121	Mouse Phenotype	abnormal tooth morphology	2.1927e-07	0.0120654	3.57196	6.43904	23	350	14	122	141
DNA	TcMar?	MER121	Disease Ontology	sarcoma	2.21215e-07	0.012001	2.13547	24.3506	52	350	33	682	959
DNA	TcMar?	MER121	Mouse Phenotype	abnormal digit morphology	2.22174e-07	0.0120108	2.8656	10.818	31	350	22	185	202
DNA	TcMar?	MER121	MGI Expression: Detected	TS15_umbilical vein	2.28697e-07	0.0122772	13.1958	0.606255	8	350	4	5	6
DNA	TcMar?	MER121	Disease Ontology	soft tissue disease	2.29945e-07	0.0123014	2.13277	24.3815	52	350	33	684	964
DNA	TcMar?	MER121	Disease Ontology	musculoskeletal system disease	2.33099e-07	0.0122573	1.90083	35.2477	67	350	45	1032	1462
DNA	TcMar?	MER121	MGI Expression: Detected	TS17_gut	2.33791e-07	0.0122519	2.92233	10.2658	30	350	17	175	242
DNA	TcMar?	MER121	Mouse Phenotype	abnormal incisor morphology	2.3689e-07	0.0123304	4.19648	4.5276	19	350	10	69	76
DNA	TcMar?	MER121	MGI Expression: Detected	TS25_gut	2.39387e-07	0.0124184	3.55384	6.47186	23	350	14	138	177
DNA	TcMar?	MER121	MGI Expression: Detected	TS20_maxillary process	2.43382e-07	0.0125412	3.32521	7.51833	25	350	14	101	112
DNA	TcMar?	MER121	GO Biological Process	multicellular organismal process	2.56614e-07	0.0131352	1.35996	129.416	176	350	134	3183	4553
DNA	TcMar?	MER121	GO Molecular Function	growth factor activity	2.60129e-07	0.0132272	3.98105	5.0238	20	350	10	128	166
DNA	TcMar?	MER121	Mouse Phenotype	absent incisors	2.61171e-07	0.0132365	6.91347	1.73574	12	350	4	22	24
DNA	TcMar?	MER121	Mouse Phenotype	abnormal vascular development	2.75193e-07	0.0139014	2.46485	15.8225	39	350	26	307	360
DNA	TcMar?	MER121	MGI Expression: Detected	TS17_sensory organ	2.83065e-07	0.0142523	2.01315	28.8106	58	350	39	409	510
DNA	TcMar?	MER121	MGI Expression: Detected	TS17_embryo	2.88767e-07	0.014445	1.45761	95.3615	139	350	102	1941	2542
DNA	TcMar?	MER121	GO Biological Process	negative regulation of cell proliferation	3.02299e-07	0.0150244	2.57252	13.9941	36	350	21	302	409
DNA	TcMar?	MER121	MGI Expression: Detected	Theiler_stage_17	3.03568e-07	0.0150389	1.45643	95.4387	139	350	102	1946	2559
DNA	TcMar?	MER121	Mouse Phenotype	abnormal sternum morphology	3.09229e-07	0.015173	3.02254	9.26372	28	350	18	150	171
DNA	TcMar?	MER121	MGI Expression: Detected	TS19_footplate;ectoderm;apical ectodermal ridge	3.12481e-07	0.0152839	7.6371	1.44034	11	350	4	14	14
DNA	TcMar?	MER121	Mouse Phenotype	abnormal neurocranium morphology	3.18125e-07	0.0155107	2.65728	12.7951	34	350	23	185	209
DNA	TcMar?	MER121	MGI Expression: Detected	TS22_alimentary system;oral region	3.22132e-07	0.0156566	1.88391	35.5644	67	350	50	705	899
DNA	TcMar?	MER121	GO Biological Process	positive regulation of myeloid cell differentiation	3.24682e-07	0.0156815	6.12661	2.12189	13	350	5	34	40
DNA	TcMar?	MER121	GO Biological Process	prostate gland development	3.26222e-07	0.0157067	5.61229	2.49452	14	350	7	37	42
DNA	TcMar?	MER121	MGI Expression: Detected	TS24_pancreas	3.31555e-07	0.0159137	3.91929	5.10296	20	350	11	73	83
DNA	TcMar?	MER121	Mouse Phenotype	abnormal vertebrae morphology	3.34681e-07	0.0159643	2.81092	11.0284	31	350	22	236	282
DNA	TcMar?	MER121	MGI Expression: Detected	TS20_respiratory tract	3.3473e-07	0.0159173	6.10993	2.12768	13	350	5	28	31
DNA	TcMar?	MER121	MGI Expression: Detected	TS22_metanephros	3.37375e-07	0.0159447	1.98713	29.691	59	350	47	590	757
DNA	TcMar?	MER121	Mouse Phenotype	abnormal heart atrium morphology	3.43803e-07	0.0161988	3.0843	8.75401	27	350	18	130	156
DNA	TcMar?	MER121	GO Cellular Component	extracellular region	3.59287e-07	0.0167745	1.85562	37.1843	69	350	52	1204	2000
DNA	TcMar?	MER121	GO Biological Process	tube development	3.59697e-07	0.0167429	2.34107	17.9405	42	350	27	288	337
DNA	TcMar?	MER121	MGI Expression: Detected	TS18_embryo	3.65939e-07	0.0169311	1.68921	52.0954	88	350	59	1062	1391
DNA	TcMar?	MER121	MGI Expression: Detected	TS17_organ system	3.78382e-07	0.0173505	1.5074	81.5972	123	350	91	1572	2034
DNA	TcMar?	MER121	GO Biological Process	embryonic organ morphogenesis	3.85257e-07	0.0176134	3.06604	8.80614	27	350	16	139	154
DNA	TcMar?	MER121	GO Biological Process	response to external stimulus	3.86562e-07	0.0176207	2.46728	15.4016	38	350	25	418	603
DNA	TcMar?	MER121	GO Biological Process	chordate embryonic development	3.93388e-07	0.0177741	2.33304	18.0023	42	350	28	333	408
DNA	TcMar?	MER121	GO Biological Process	diencephalon development	3.93434e-07	0.0177242	4.78461	3.34405	16	350	6	40	44
DNA	TcMar?	MER121	MGI Expression: Detected	TS21_respiratory tract	3.98612e-07	0.0178013	12.2588	0.652592	8	350	3	10	14
DNA	TcMar?	MER121	MGI Expression: Detected	TS24_gut;gland	3.99326e-07	0.0177817	3.87241	5.16475	20	350	11	79	91
DNA	TcMar?	MER121	MGI Expression: Detected	TS17_forelimb bud	4.03702e-07	0.0179247	2.58377	13.5461	35	350	23	199	214
DNA	TcMar?	MER121	GO Biological Process	prostate gland epithelium morphogenesis	4.13216e-07	0.0182944	5.99568	2.16823	13	350	6	26	27
DNA	TcMar?	MER121	GO Biological Process	prostate gland morphogenesis	4.17333e-07	0.0183711	5.99034	2.17016	13	350	6	27	28
DNA	TcMar?	MER121	MGI Expression: Detected	Theiler_stage_18	4.2484e-07	0.0186483	1.68341	52.275	88	350	59	1068	1398
DNA	TcMar?	MER121	GO Biological Process	regulation of morphogenesis of a branching structure	4.40897e-07	0.0192435	6.57694	1.82456	12	350	6	24	31
DNA	TcMar?	MER121	GO Biological Process	regulation of cytokine biosynthetic process	4.45798e-07	0.0192934	6.56999	1.82649	12	350	5	56	80
DNA	TcMar?	MER121	GO Biological Process	embryonic development ending in birth or egg hatching	4.49509e-07	0.0193995	2.32109	18.095	42	350	28	336	413
DNA	TcMar?	MER121	MGI Expression: Detected	TS20_axial skeleton;cervical region	4.56303e-07	0.019583	9.87587	0.911313	9	350	3	14	14
DNA	TcMar?	MER121	Mouse Phenotype	fused joints	4.60848e-07	0.0197232	3.83655	5.21302	20	350	13	79	89
DNA	TcMar?	MER121	MGI Expression: Detected	TS17_mesonephros	4.79565e-07	0.0203546	3.82663	5.22653	20	350	12	119	172
DNA	TcMar?	MER121	GO Biological Process	negative regulation of biological process	4.92838e-07	0.0208604	1.57865	66.5123	105	350	71	1617	2156
DNA	TcMar?	MER121	Mouse Phenotype	abnormal vertebral arch development	4.95853e-07	0.0209306	8.32692	1.20092	10	350	4	25	30
DNA	TcMar?	MER121	Mouse Phenotype	abnormal vertebrae development	4.99585e-07	0.0210305	5.02199	2.98687	15	350	8	56	66
DNA	TcMar?	MER121	Mouse Phenotype	vision/eye phenotype	5.02371e-07	0.0210902	1.86068	36.0084	67	350	49	710	872
DNA	TcMar?	MER121	MGI Expression: Detected	TS17_urogenital system	5.07694e-07	0.0210838	3.29196	7.2905	24	350	16	168	236
DNA	TcMar?	MER121	GO Biological Process	nephron development	5.20433e-07	0.021497	7.24844	1.51757	11	350	5	15	17
DNA	TcMar?	MER121	MGI Expression: Detected	TS20_vibrissa	5.33086e-07	0.0219022	4.17315	4.31329	18	350	8	45	49
DNA	TcMar?	MER121	MGI Expression: Detected	TS17_cardiovascular system	5.33325e-07	0.0218537	2.55248	13.7122	35	350	22	295	388
DNA	TcMar?	MER121	MGI Expression: Detected	TS19_forelimb bud	5.61779e-07	0.0227175	2.59081	13.1233	34	350	22	175	188
DNA	TcMar?	MER121	Human Phenotype	Aplasia/Hypoplasia involving bones of the lower limbs	5.7842e-07	0.0230875	4.64515	3.44445	16	350	8	50	65
DNA	TcMar?	MER121	Disease Ontology	mixed cell type cancer	5.87127e-07	0.0233745	2.4616	15.0309	37	350	22	406	582
DNA	TcMar?	MER121	MGI Expression: Detected	TS20_shoulder;mesenchyme	6.01107e-07	0.023747	9.55207	0.942204	9	350	3	8	8
DNA	TcMar?	MER121	Mouse Phenotype	abnormal embryogenesis/ development	6.19886e-07	0.0243639	1.73531	45.5251	79	350	52	1018	1287
DNA	TcMar?	MER121	Mouse Phenotype	abnormal heart morphology	6.42075e-07	0.0250444	1.9344	31.0174	60	350	43	661	818
DNA	TcMar?	MER121	Disease Ontology	peripheral nerve Sheath neoplasm	6.50098e-07	0.0251661	8.0801	1.23761	10	350	4	23	30
DNA	TcMar?	MER121	Human Phenotype	Abnormality of the phalanges of the hand	6.94381e-07	0.0266793	3.45604	6.36567	22	350	11	117	141
DNA	TcMar?	MER121	Disease Ontology	arthritis	7.14667e-07	0.0273904	3.3331	6.90049	23	350	14	215	319
DNA	TcMar?	MER121	Disease Ontology	carcinoma	7.23308e-07	0.0276528	1.74511	44.1234	77	350	54	1099	1589
DNA	TcMar?	MER121	MGI Expression: Detected	TS22_renal/urinary system	7.34338e-07	0.0277986	1.84084	36.3965	67	350	55	734	937
DNA	TcMar?	MER121	GO Biological Process	positive regulation of multicellular organismal process	7.37304e-07	0.0278425	2.82492	10.2658	29	350	15	229	305
DNA	TcMar?	MER121	Mouse Phenotype	abnormal coat appearance	7.44029e-07	0.0279594	2.51529	13.9149	35	350	24	296	396
DNA	TcMar?	MER121	GO Molecular Function	protein dimerization activity	7.51259e-07	0.0279583	2.22181	19.8037	44	350	29	459	610
DNA	TcMar?	MER121	Mouse Phenotype	abnormal eyelid morphology	7.54895e-07	0.0278248	2.6514	12.0691	32	350	21	180	204
DNA	TcMar?	MER121	GO Biological Process	limb development	7.55189e-07	0.0277692	3.21782	7.45848	24	350	14	107	116
DNA	TcMar?	MER121	Human Phenotype	Aplasia/Hypoplasia of the extremities	8.49393e-07	0.0303636	3.41359	6.44483	22	350	11	105	144
DNA	TcMar?	MER121	MGI Expression: Detected	TS22_embryo;skeleton	8.54671e-07	0.0304815	2.00706	26.905	54	350	43	573	731
DNA	TcMar?	MER121	Mouse Phenotype	short limbs	8.67026e-07	0.0308507	3.68113	5.43312	20	350	13	84	97
DNA	TcMar?	MER121	GO Biological Process	positive regulation of transport	9.06708e-07	0.0316774	3.18402	7.53764	24	350	11	213	292
DNA	TcMar?	MER121	GO Biological Process	hormone secretion	9.15992e-07	0.0319294	7.77679	1.28588	10	350	3	39	46
DNA	TcMar?	MER121	Mouse Phenotype	abnormal tail morphology	9.20599e-07	0.0320175	2.7934	10.3816	29	350	20	192	236
DNA	TcMar?	MER121	Mouse Phenotype	abnormal long bone morphology	9.22815e-07	0.0320223	2.57834	12.7989	33	350	22	255	304
DNA	TcMar?	MER121	MGI Expression: Detected	TS22_handplate;digit#	9.60737e-07	0.032967	5.5554	2.34007	13	350	5	26	27
DNA	TcMar?	MER121	Disease Ontology	chondrosarcoma	9.6634e-07	0.0330122	7.73036	1.2936	10	350	4	17	22
DNA	TcMar?	MER121	MGI Expression: Detected	TS20_shoulder	9.66506e-07	0.0329448	9.01626	0.998196	9	350	3	10	10
DNA	TcMar?	MER121	MGI Expression: Detected	TS21_genital tubercle#	9.80365e-07	0.0333435	4.7546	3.15484	15	350	6	32	34
DNA	TcMar?	MER121	Disease Ontology	malignant neoplasm of muscle	9.81942e-07	0.0333235	8.99886	1.00013	9	350	4	28	37
DNA	TcMar?	MER121	Mouse Phenotype	abnormal paw/hand/foot morphology	9.84697e-07	0.0332705	2.61831	12.2216	32	350	23	216	242
DNA	TcMar?	MER121	GO Biological Process	hormone transport	9.92408e-07	0.0333846	7.70735	1.29746	10	350	3	41	50
DNA	TcMar?	MER121	Disease Ontology	malignant neoplasm of abdomen	1.01374e-06	0.033954	1.99575	27.0575	54	350	36	670	971
DNA	TcMar?	MER121	Mouse Phenotype	abnormal vascular endothelial cell physiology	1.01506e-06	0.0339242	10.8185	0.739476	8	350	3	21	27
DNA	TcMar?	MER121	MGI Expression: Detected	TS19_visceral organ	1.03212e-06	0.0344197	2.01117	26.3528	53	350	35	441	549
DNA	TcMar?	MER121	MGI Expression: Detected	TS21_pancreas	1.08972e-06	0.0359516	3.25034	7.07619	23	350	13	103	122
DNA	TcMar?	MER121	MGI Expression: Detected	TS17_nasal epithelium	1.08975e-06	0.0358758	5.49196	2.3671	13	350	4	19	20
DNA	TcMar?	MER121	MGI Expression: Detected	TS19_footplate;ectoderm	1.10984e-06	0.0363816	6.70268	1.64113	11	350	4	19	19
DNA	TcMar?	MER121	Human Phenotype	Aplasia/Hypoplasia of the toes	1.10984e-06	0.0363043	6.70268	1.64113	11	350	5	26	28
DNA	TcMar?	MER121	MGI Expression: Detected	TS17_embryo;mesenchyme	1.1267e-06	0.0366228	2.35961	16.1044	38	350	27	252	294
DNA	TcMar?	MER121	GO Biological Process	positive regulation of ERK1 and ERK2 cascade	1.13217e-06	0.0366459	7.59434	1.31677	10	350	4	28	40
DNA	TcMar?	MER121	Mouse Phenotype	abnormal limb bud morphology	1.13303e-06	0.036444	3.77474	5.03346	19	350	11	62	73
DNA	TcMar?	MER121	MGI Expression: Detected	TS20_hindlimb	1.19984e-06	0.0378813	3.13267	7.6612	24	350	13	120	130
DNA	TcMar?	MER121	GO Biological Process	blood vessel development	1.21444e-06	0.0382637	2.461	14.2219	35	350	24	255	303
DNA	TcMar?	MER121	Mouse Phenotype	respiratory system phenotype	1.22513e-06	0.0385219	1.83584	35.406	65	350	49	721	885
DNA	TcMar?	MER121	Mouse Phenotype	abnormal bone mineralization	1.24523e-06	0.0390741	3.75029	5.06628	19	350	10	90	107
DNA	TcMar?	MER121	GO Biological Process	regulation of striated muscle tissue development	1.26037e-06	0.0393887	4.13181	4.11442	17	350	9	44	55
DNA	TcMar?	MER121	MGI Expression: Detected	TS22_upper jaw	1.26895e-06	0.0394965	2.1098	22.277	47	350	36	416	514
DNA	TcMar?	MER121	MGI Expression: Detected	TS21_limb	1.27301e-06	0.0395432	2.38145	15.5367	37	350	20	227	258
DNA	TcMar?	MER121	MGI Expression: Detected	TS20_reproductive system	1.2906e-06	0.0399285	2.58482	12.3799	32	350	18	185	233
DNA	TcMar?	MER121	Mouse Phenotype	growth/size phenotype	1.29529e-06	0.0399935	1.47385	83.4546	123	350	89	1968	2492
DNA	TcMar?	MER121	GO Biological Process	regulation of muscle organ development	1.33341e-06	0.0410879	4.11443	4.1318	17	350	9	46	57
DNA	TcMar?	MER121	GO Biological Process	reproductive process in a multicellular organism	1.35785e-06	0.041509	2.4487	14.2933	35	350	19	378	554
DNA	TcMar?	MER121	Disease Ontology	reproductive system cancer	1.36535e-06	0.0416556	1.91668	30.2606	58	350	39	772	1118
DNA	TcMar?	MER121	MGI Expression: Detected	TS15_1st arch	1.36943e-06	0.0416151	3.3143	6.63791	22	350	15	109	126
DNA	TcMar?	MER121	Human Phenotype	Bifid scrotum	1.37398e-06	0.0416713	7.43091	1.34573	10	350	4	10	12
DNA	TcMar?	MER121	Mouse Phenotype	abnormal joint morphology	1.3823e-06	0.0418413	3.31237	6.64177	22	350	14	110	128
DNA	TcMar?	MER121	MGI Expression: Detected	TS20_alimentary system	1.43752e-06	0.043258	2.05997	23.7868	49	350	35	375	444
DNA	TcMar?	MER121	MGI Expression: Detected	TS18_branchial arch	1.46119e-06	0.043714	3.55602	5.62427	20	350	7	63	70
DNA	TcMar?	MER121	MGI Expression: Detected	TS19_handplate	1.46558e-06	0.0437605	3.42032	6.13978	21	350	12	71	72
DNA	TcMar?	MER121	GO Biological Process	endocrine system development	1.47617e-06	0.0439063	3.7065	5.12613	19	350	9	76	83
DNA	TcMar?	MER121	Mouse Phenotype	abnormal red blood cell	1.48145e-06	0.0439786	2.72647	10.6365	29	350	15	293	404
DNA	TcMar?	MER121	MGI Expression: Detected	TS22_visceral organ	1.52549e-06	0.0451122	1.54208	68.0897	105	350	81	1490	1995
DNA	TcMar?	MER121	GO Biological Process	negative regulation of chondrocyte differentiation	1.53588e-06	0.0453322	10.2308	0.781952	8	350	3	4	6
DNA	TcMar?	MER121	Mouse Phenotype	abnormal limbs/digits/tail development	1.55131e-06	0.0455259	3.086	7.77705	24	350	16	116	137
DNA	TcMar?	MER121	MGI Expression: Detected	TS21_limb;cartilage condensation#	1.55557e-06	0.0455644	8.50622	1.05805	9	350	3	7	7
DNA	TcMar?	MER121	MGI Expression: Detected	TS20_body-wall mesenchyme	1.55557e-06	0.045478	8.50622	1.05805	9	350	3	13	15
DNA	TcMar?	MER121	MGI Expression: Detected	TS20_arm	1.58792e-06	0.046074	5.30587	2.45012	13	350	6	30	31
DNA	TcMar?	MER121	Mouse Phenotype	abnormal limb development	1.5953e-06	0.046201	3.17666	7.2403	23	350	15	106	124
DNA	TcMar?	MER121	Disease Ontology	abdominal cancer	1.59534e-06	0.0461155	1.93543	28.9342	56	350	38	708	1020
DNA	TcMar?	MER121	MGI Expression: Detected	TS17_urogenital system;gonadal component	1.60241e-06	0.0461467	8.47529	1.06191	9	350	5	24	34
DNA	TcMar?	MER121	Disease Ontology	epithelial carcinoma	1.6257e-06	0.0465563	1.89261	31.1738	59	350	39	733	1074
DNA	TcMar?	MER121	Disease Ontology	cancer by anatomical entity	1.64135e-06	0.0469173	1.61245	56.4357	91	350	65	1498	2148
DNA	TcMar?	MER121	MGI Expression: Detected	TS20_respiratory system	1.68586e-06	0.0481003	2.83483	9.52437	27	350	14	154	184
DNA	TcMar?	MER121	Disease Ontology	simple genetic disease	1.68733e-06	0.0480534	3.27148	6.72479	22	350	11	217	318
DNA	TcMar?	MER121	GO Biological Process	negative regulation of cell cycle	1.71187e-06	0.0485728	3.38625	6.20156	21	350	9	136	182
DNA	TcMar?	MER121	GO Biological Process	epithelial tube morphogenesis	1.86313e-06	0.0518148	2.89038	8.99535	26	350	15	118	142
DNA	TcMar?	MER121	Mouse Phenotype	abnormal ulna morphology	1.88475e-06	0.0522277	4.23668	3.77654	16	350	11	58	62
DNA	TcMar?	MER121	GO Biological Process	negative regulation of phosphorylation	1.92558e-06	0.0530727	5.70203	2.10451	12	350	4	43	60
DNA	TcMar?	MER121	MGI Expression: Detected	TS21_integumental system	1.95251e-06	0.0532435	3.48777	5.73432	20	350	9	80	92
DNA	TcMar?	MER121	MGI Expression: Detected	TS15_embryo	1.96356e-06	0.0534501	1.57269	61.6777	97	350	73	1174	1492
DNA	TcMar?	MER121	Mouse Phenotype	abnormal hindlimb morphology	1.97874e-06	0.0535794	2.81033	9.6074	27	350	19	181	204
DNA	TcMar?	MER121	Mouse Phenotype	abnormal palate morphology	2.02466e-06	0.0545351	2.44376	13.913	34	350	21	191	214
DNA	TcMar?	MER121	Mouse Phenotype	embryonic lethality during organogenesis	2.10485e-06	0.0558169	1.9038	29.9401	57	350	37	655	811
DNA	TcMar?	MER121	MGI Expression: Detected	TS24_forelimb;skeleton#	2.11334e-06	0.0558498	5.65019	2.12382	12	350	6	34	40
DNA	TcMar?	MER121	GO Biological Process	organ formation	2.14182e-06	0.0559308	8.17791	1.10053	9	350	3	15	18
DNA	TcMar?	MER121	Disease Ontology	female reproductive system disease	2.28305e-06	0.0584304	2.93348	8.52232	25	350	15	248	367
DNA	TcMar?	MER121	MGI Expression: Detected	TS21_vertebral axis muscle system	2.4714e-06	0.0618136	9.59138	0.834083	8	350	3	23	25
DNA	TcMar?	MER121	GO Biological Process	gland morphogenesis	2.47251e-06	0.0617412	3.57585	5.31342	19	350	9	76	88
DNA	TcMar?	MER121	Mouse Phenotype	abnormal nose morphology	2.47817e-06	0.0616825	3.30596	6.35216	21	350	13	86	102
DNA	TcMar?	MER121	Mouse Phenotype	abnormal sternum ossification	2.49236e-06	0.0619357	5.55922	2.15857	12	350	7	32	35
DNA	TcMar?	MER121	MGI Expression: Detected	TS25_integumental system	2.56052e-06	0.063323	4.1352	3.86922	16	350	7	99	112
DNA	TcMar?	MER121	Human Phenotype	Head abnormality	2.58464e-06	0.0635118	2.07517	22.1669	46	350	29	549	764
DNA	TcMar?	MER121	Mouse Phenotype	abnormal erythropoiesis	2.61795e-06	0.0638211	2.594	11.5652	30	350	16	322	444
DNA	TcMar?	MER121	GO Biological Process	regulation of transmembrane receptor protein serine/threonine kinase signaling pathway	2.65115e-06	0.0645286	3.7202	4.83845	18	350	8	82	96
DNA	TcMar?	MER121	GO Cellular Component	extracellular space	2.66523e-06	0.0647689	2.37491	14.7374	35	350	24	467	764
DNA	TcMar?	MER121	GO Biological Process	ureteric bud development	2.69296e-06	0.065237	3.41308	5.85982	20	350	11	63	65
DNA	TcMar?	MER121	GO Biological Process	regulation of cellular localization	2.70341e-06	0.0653874	2.83084	9.18456	26	350	13	261	340
DNA	TcMar?	MER121	GO Biological Process	regulation of myoblast differentiation	2.75601e-06	0.0659349	6.09335	1.80525	11	350	5	11	15
DNA	TcMar?	MER121	MGI Expression: Detected	TS17_infundibular recess of 3rd ventricle	2.81688e-06	0.0667692	15.695	0.382288	6	350	3	8	9
DNA	TcMar?	MER121	Human Phenotype	Large ears	2.83081e-06	0.0667911	7.90069	1.13914	9	350	3	18	27
DNA	TcMar?	MER121	GO Biological Process	negative regulation of phosphate metabolic process	2.87838e-06	0.0678097	5.48079	2.18947	12	350	4	47	64
DNA	TcMar?	MER121	GO Biological Process	renal system development	2.99953e-06	0.0700213	3.05684	7.52412	23	350	14	92	105
DNA	TcMar?	MER121	GO Biological Process	positive regulation of locomotion	3.00636e-06	0.0700747	3.52715	5.38678	19	350	12	111	146
DNA	TcMar?	MER121	GO Biological Process	vasculature development	3.02098e-06	0.070203	2.3613	14.8223	35	350	24	263	311
DNA	TcMar?	MER121	Mouse Phenotype	abnormal frontal bone morphology	3.20544e-06	0.0737112	3.66896	4.90603	18	350	9	61	69
DNA	TcMar?	MER121	GO Biological Process	regulation of RNA metabolic process	3.21604e-06	0.0737349	1.55517	62.3728	97	350	64	1271	1905
DNA	TcMar?	MER121	GO Biological Process	regulation of multicellular organismal process	3.33568e-06	0.0748081	1.74278	39.5919	69	350	46	878	1159
DNA	TcMar?	MER121	MGI Expression: Detected	TS22_footplate;digit#;mesenchyme#	3.37431e-06	0.0754548	7.73036	1.16424	9	350	3	9	9
DNA	TcMar?	MER121	Human Phenotype	Aplasia/Hypoplasia involving bones of the feet	3.38243e-06	0.0755267	4.94721	2.62775	13	350	6	43	52
DNA	TcMar?	MER121	MGI Expression: Detected	TS21_foregut	3.39442e-06	0.0756847	3.35994	5.95249	20	350	11	104	135
DNA	TcMar?	MER121	GO Biological Process	heart development	3.39472e-06	0.075582	2.61174	11.1037	29	350	18	207	248
DNA	TcMar?	MER121	GO Biological Process	regulation of muscle cell differentiation	3.4048e-06	0.0756972	4.04241	3.95803	16	350	10	38	44
DNA	TcMar?	MER121	GO Biological Process	ossification	3.44691e-06	0.0764128	3.49334	5.43891	19	350	11	111	134
DNA	TcMar?	MER121	GO Biological Process	cellular response to chemical stimulus	3.45193e-06	0.0764142	2.7921	9.31199	26	350	18	291	427
DNA	TcMar?	MER121	Mouse Phenotype	abnormal aorta morphology	3.46554e-06	0.0766053	2.66486	10.5071	28	350	20	185	218
DNA	TcMar?	MER121	Human Phenotype	Hypoplastic/small phalanges of the hand	3.46801e-06	0.0765501	4.28281	3.50237	15	350	8	45	52
DNA	TcMar?	MER121	Human Phenotype	Head and neck abnormality	3.50211e-06	0.0770819	2.05123	22.4256	46	350	29	565	786
DNA	TcMar?	MER121	MGI Expression: Detected	TS17_diencephalon;gland;pituitary	3.5372e-06	0.0777432	15.0855	0.397734	6	350	3	9	10
DNA	TcMar?	MER121	MGI Expression: Detected	TS23_embryo	3.53725e-06	0.0776337	1.44947	84.169	122	350	91	1899	2527
DNA	TcMar?	MER121	Mouse Phenotype	cleft palate	3.59694e-06	0.0787194	2.55224	11.7544	30	350	18	162	182
DNA	TcMar?	MER121	MGI Expression: Detected	TS22_alimentary system	3.59939e-06	0.0786611	1.59397	55.8353	89	350	69	1202	1583
DNA	TcMar?	MER121	Mouse Phenotype	abnormal looping morphogenesis	3.60625e-06	0.0786995	3.48222	5.45629	19	350	10	86	99
DNA	TcMar?	MER121	Mouse Phenotype	edema	3.66855e-06	0.0793845	2.37681	14.3049	34	350	21	243	308
DNA	TcMar?	MER121	MGI Expression: Detected	Theiler_stage_23	3.67816e-06	0.0794808	1.44837	84.2327	122	350	91	1904	2535
DNA	TcMar?	MER121	MGI Expression: Detected	TS22_embryo	3.69714e-06	0.0796674	1.35139	116.177	157	350	117	2707	3556
DNA	TcMar?	MER121	MGI Expression: Detected	TS15_arterial system	3.74756e-06	0.0805287	4.54613	3.07954	14	350	9	49	56
DNA	TcMar?	MER121	MGI Expression: Detected	TS21_pharynx	3.75238e-06	0.08052	4.01111	3.98892	16	350	8	55	67
DNA	TcMar?	MER121	GO Biological Process	regulation of transcription, DNA-dependent	3.77346e-06	0.0808596	1.55955	60.9151	95	350	63	1235	1853
DNA	TcMar?	MER121	Mouse Phenotype	normal phenotype	3.9649e-06	0.084027	1.72505	40.5785	70	350	49	1025	1354
DNA	TcMar?	MER121	GO Biological Process	protein localization in nucleus	4.02192e-06	0.0848851	4.51781	3.09885	14	350	9	75	100
DNA	TcMar?	MER121	MGI Expression: Detected	TS15_extraembryonic component;cardiovascular system	4.05882e-06	0.0854299	14.728	0.407388	6	350	3	7	9
DNA	TcMar?	MER121	GO Biological Process	regulation of programmed cell death	4.07567e-06	0.0853183	1.96619	25.4299	50	350	30	676	931
DNA	TcMar?	MER121	MGI Expression: Detected	TS17_heart	4.08569e-06	0.0854119	2.53558	11.8316	30	350	17	252	332
DNA	TcMar?	MER121	Mouse Phenotype	abnormal bone structure	4.11779e-06	0.0859665	2.48737	12.463	31	350	20	282	361
DNA	TcMar?	MER121	MGI Expression: Detected	TS21_arm	4.13118e-06	0.085781	5.83737	1.88441	11	350	4	23	26
DNA	TcMar?	MER121	Mouse Phenotype	abnormal palate development	4.13995e-06	0.0858475	3.31478	6.03358	20	350	14	81	92
DNA	TcMar?	MER121	GO Biological Process	negative regulation of cellular biosynthetic process	4.24256e-06	0.0871542	1.91586	27.6637	53	350	33	513	645
DNA	TcMar?	MER121	MGI Expression: Detected	TS17_brain	4.25164e-06	0.0871083	1.75869	37.5279	66	350	50	516	629
DNA	TcMar?	MER121	MGI Expression: Detected	Theiler_stage_22	4.25541e-06	0.0868392	1.34838	116.436	157	350	117	2715	3565
DNA	TcMar?	MER121	MGI Expression: Detected	TS20_renal/urinary system	4.29867e-06	0.0870303	2.48198	12.49	31	350	17	224	281
DNA	TcMar?	MER121	GO Biological Process	kidney development	4.44722e-06	0.0891013	3.07711	7.14956	22	350	13	89	102
DNA	TcMar?	MER121	GO Biological Process	mesodermal cell differentiation	4.46902e-06	0.0894216	10.9533	0.639077	7	350	4	7	8
DNA	TcMar?	MER121	GO Biological Process	negative regulation of biosynthetic process	4.51178e-06	0.089464	1.91173	27.7236	53	350	33	521	655
DNA	TcMar?	MER121	Human Phenotype	Toe syndactyly	4.52186e-06	0.0895487	5.24048	2.28987	12	350	5	27	29
DNA	TcMar?	MER121	GO Biological Process	cell development	4.64372e-06	0.0913746	1.8064	33.7688	61	350	41	599	718
DNA	TcMar?	MER121	GO Biological Process	regulation of cell death	4.65403e-06	0.0914607	1.95668	25.5534	50	350	30	682	939
DNA	TcMar?	MER121	Human Phenotype	Abnormality of the toes	4.65484e-06	0.0913601	3.74198	4.54305	17	350	8	93	106
DNA	TcMar?	MER121	MGI Expression: Detected	TS21_reproductive system	4.6637e-06	0.0914174	2.56842	11.291	29	350	18	192	254
DNA	TcMar?	MER121	Human Phenotype	Short scapulae	4.72161e-06	0.0922006	8.77855	0.911313	8	350	5	9	13
DNA	TcMar?	MER121	GO Biological Process	negative regulation of macromolecule biosynthetic process	4.88384e-06	0.094768	1.92142	27.0633	52	350	32	506	625
DNA	TcMar?	MER121	GO Biological Process	mesoderm morphogenesis	4.95005e-06	0.0954518	5.72591	1.92109	11	350	6	35	41
DNA	TcMar?	MER121	Mouse Phenotype	abnormal angiogenesis	4.95955e-06	0.0955153	2.38081	13.8608	33	350	21	260	299
DNA	TcMar?	MER121	GO Molecular Function	transcription activator activity	4.99836e-06	0.0961427	2.10869	19.9176	42	350	26	371	457
DNA	TcMar?	MER121	MGI Expression: Detected	TS22_pancreas	5.02902e-06	0.0966117	1.90443	27.8298	53	350	37	640	880
DNA	TcMar?	MER121	GO Biological Process	positive regulation of cell migration	5.16876e-06	0.0988035	3.5421	5.08173	18	350	11	104	137
DNA	TcMar?	MER121	Human Phenotype	Aplasia/Hypoplasia of the phalanges of the hand	5.16915e-06	0.0986886	4.14127	3.62208	15	350	8	50	58
DNA	TcMar?	MER121	Human Phenotype	Spinal canal stenosis	5.2574e-06	0.0998783	20.5529	0.243274	5	350	3	4	5
SINE?	SINE?	MER131	GO Cellular Component	nuclear lumen	3.97555e-06	0.084137	2.24215	16.056	36	194	30	922	1364
DNA	hAT-Charlie	MER20B	GO Biological Process	myeloid leukocyte activation	1.00968e-06	0.0338915	28.6179	0.174716	5	74	3	35	55
SINE	MIR	MIR3	GO Cellular Component	cytoplasm	3.1877e-08	0.00348321	1.11617	1259.67	1406	3013	1008	5185	7781
SINE	MIR	MIR3	GO Biological Process	intracellular signaling pathway	3.90921e-07	0.0177146	1.34012	213.413	286	3013	207	845	1163
SINE	MIR	MIR3	GO Molecular Function	GTPase activity	6.27703e-07	0.0245459	2.13827	23.8511	51	3013	33	147	221
SINE	MIR	MIR3	GO Biological Process	regulation of stress fiber assembly	8.15265e-07	0.0292794	3.84894	4.93643	19	3013	11	19	22
SINE	MIR	MIR3	GO Biological Process	regulation of actin filament bundle assembly	9.63392e-07	0.0329846	3.39392	6.48218	22	3013	13	21	26
SINE	MIR	MIR3	InterPro	Membrane attack complex component/perforin (MACPF) domain	1.46705e-06	0.0437194	2.88024	9.37423	27	3013	8	11	12
SINE	MIR	MIR3	GO Biological Process	positive regulation of actin filament bundle assembly	3.15911e-06	0.0728633	4.27713	3.50703	15	3013	8	14	18
SINE	MIR	MIRb	GO Molecular Function	microtubule plus-end binding	1.38717e-07	0.00883153	5.00221	3.19859	16	5042	6	8	10
SINE	MIR	MIRb	GO Molecular Function	catalytic activity	4.42878e-07	0.0192211	1.1176	1298.32	1451	5042	910	3499	5395
SINE	MIR	MIRb	Mouse Phenotype	impaired synaptic plasticity	8.13598e-07	0.0292878	2.52684	13.8513	35	5042	12	25	29
SINE	MIR	MIRb	GO Biological Process	regulated secretory pathway	1.9258e-06	0.052984	3.74082	4.81179	18	5042	6	13	20
SINE	MIR	MIRc	GO Biological Process	adaptive immune response based on somatic recombination of immune receptors built from immunoglobulin superfamily domains	6.58555e-08	0.00573244	2.99694	10.6775	32	3378	11	51	81
SINE	MIR	MIRc	GO Biological Process	cation homeostasis	8.91368e-08	0.00676522	1.80317	51.0212	92	3378	51	207	304
SINE	MIR	MIRc	GO Biological Process	adaptive immune response	1.05055e-07	0.00742473	2.93547	10.9012	32	3378	11	52	82
SINE	MIR	MIRc	GO Cellular Component	membrane	1.14217e-07	0.00768453	1.10635	1389.26	1537	3378	984	4709	7217
SINE	MIR	MIRc	GO Biological Process	cellular cation homeostasis	1.16225e-07	0.00775192	1.85588	44.7227	83	3378	47	181	267
SINE	MIR	MIRc	GO Biological Process	metal ion transport	1.51603e-07	0.00941843	1.51397	109.645	166	3378	106	355	470
SINE	MIR	MIRc	GO Biological Process	cellular di-, tri-valent inorganic cation homeostasis	3.52454e-07	0.0165054	1.86061	40.8467	76	3378	43	160	239
SINE	MIR	MIRc	GO Biological Process	cation transport	5.98641e-07	0.0237104	1.47215	115.478	170	3378	109	407	559
SINE	MIR	MIRc	GO Biological Process	di-, tri-valent inorganic cation homeostasis	7.45025e-07	0.0279286	1.81552	42.412	77	3378	44	171	256
SINE	MIR	MIRc	Mouse Phenotype	absent lymph node germinal center	1.1166e-06	0.0363713	6.48686	1.69574	11	3378	4	7	10
SINE	MIR	MIRc	GO Biological Process	calcium ion transport into cytosol	1.13215e-06	0.0367226	3.354	6.55933	22	3378	12	20	20
SINE	MIR	MIRc	GO Biological Process	cellular metal ion homeostasis	1.69619e-06	0.0482166	1.85048	36.7472	68	3378	41	146	206
SINE	MIR	MIRc	GO Biological Process	cytosolic calcium ion transport	1.98767e-06	0.0537268	3.05198	7.86374	24	3378	13	22	22
SINE	MIR	MIRc	GO Cellular Component	cytoplasm	2.0674e-06	0.0553959	1.09328	1412.27	1544	3378	1013	5185	7781
SINE	MIR	MIRc	GO Biological Process	metal ion homeostasis	2.06868e-06	0.055334	1.83036	37.6975	69	3378	42	152	217
SINE	MIR	MIRc	InterPro	Membrane attack complex component/perforin (MACPF) domain	4.07395e-06	0.0853983	2.66417	10.5098	28	3378	6	11	12
SINE	MIR	MIRc	GO Biological Process	elevation of cytosolic calcium ion concentration	4.15232e-06	0.0859882	2.14457	20.0507	43	3378	27	88	117
SINE	MIR	MIRc	GO Biological Process	ion transport	4.23599e-06	0.0871352	1.36719	154.331	211	3378	135	548	765
SINE	MIR	MIRc	GO Biological Process	cellular chemical homeostasis	4.42035e-06	0.0889096	1.50213	87.2093	131	3378	75	288	409
SINE	MIR	MIRc	GO Cellular Component	plasma membrane	5.08664e-06	0.0974756	1.13655	808.587	919	3378	571	2442	3699
DNA?	DNA?	UCON14	Human Phenotype	Abnormality of the anterior segment of the eye	3.21409e-06	0.0738	7.37138	1.22094	9	53	7	205	281
Unknown	Unknown	UCON26	MGI Expression: Detected	TS19_renal/urinary system	4.50899e-06	0.0895239	5.0541	2.37431	12	88	10	142	174
Unknown	Unknown	UCON28b	MGI Expression: Detected	TS24_thalamus	2.42876e-07	0.0125571	6.85221	1.60532	11	32	9	188	217
Unknown	Unknown	UCON28b	MGI Expression: Detected	TS24_diencephalon	3.96089e-07	0.0177401	6.52434	1.68599	11	32	9	214	254
Unknown	Unknown	UCON28b	Mouse Phenotype	corneal opacity	6.4798e-07	0.0251474	30.2936	0.165051	5	32	3	30	39
Unknown	Unknown	UCON28b	Mouse Phenotype	small lens	1.13273e-06	0.0365106	17.3327	0.346166	6	32	4	33	38
Unknown	Unknown	UCON28b	Mouse Phenotype	abnormal nervous system development	1.62089e-06	0.0465918	3.80399	3.94323	15	32	12	727	864
Unknown	Unknown	UCON28b	MGI Expression: Detected	TS22_thalamus	2.25423e-06	0.0578853	4.02031	3.48232	14	32	12	610	755
Unknown	Unknown	UCON28b	MGI Expression: Detected	TS22_cortical plate	4.19449e-06	0.0867448	5.83349	1.71424	10	32	8	279	353
Unknown	Unknown	UCON28b	MGI Expression: Detected	TS22_cerebral cortex;ventricular layer	4.61987e-06	0.0910215	5.07732	2.1665	11	32	9	361	468
